# Supplementary material for: DNA Methylation Analysis Reveals Distinct Patterns in Satellite Cell–Derived Myogenic Progenitor Cells of Subjects with Spastic Cerebral Palsy
Source: MDPI journal article supplement (doi:10.3390/jpm12121978), 2022-11-30
Supplement: s1 [file s1]

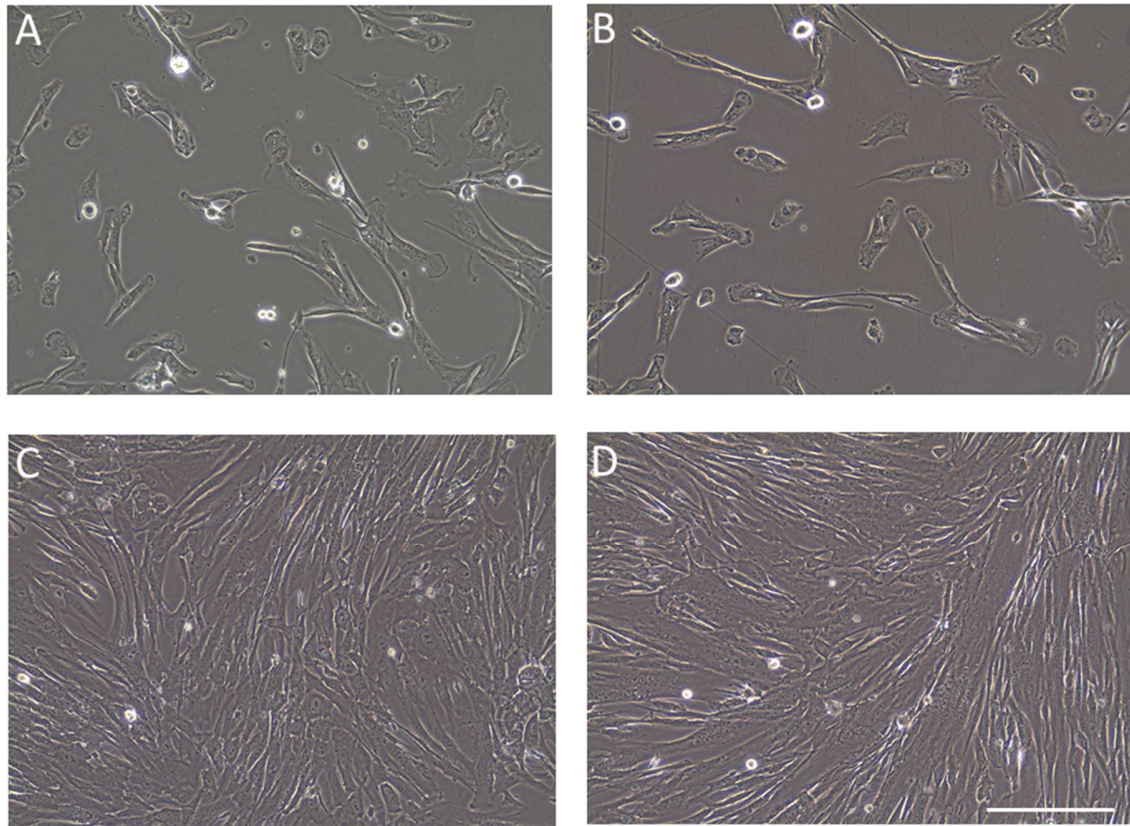

**Figure S1: Cell morphology.** Skeletal muscle biopsies underwent enzymatic digestion and subsequent double-immunomagnetic isolation to collect a population of SCs. Proliferating MBs were collected at 50% confluence. Cultures were differentiated in low-serum medium for 24 hours to initiate myoblast fusion (MTs). Representative images of control MBs after 72 hours of proliferation **(A)**, CP MBs after 72 hours of proliferation **(B)**, control MTs after 24 hours of differentiation **(C)**, and CP MTs after 24 hours of differentiation **(D)** are shown. Cells derived from subjects with CP had similar morphology to those derived from controls. Scale bar = 200  $\mu$ m.

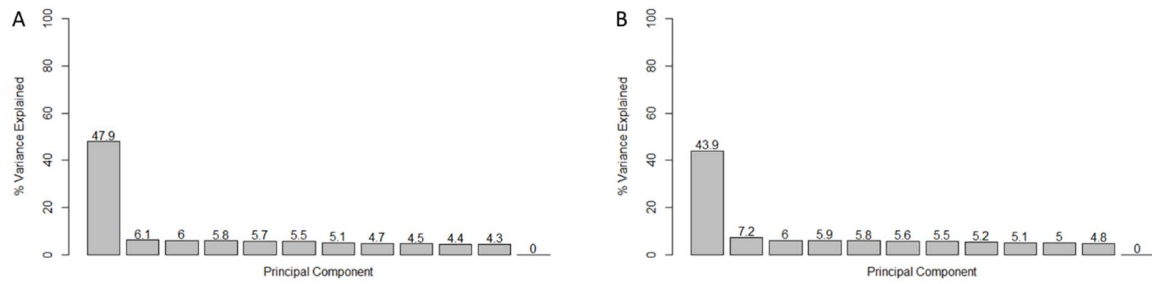

**Figure S2: Scree plots for explained variance.** Plots were generated to depict how much variation each principal component captured from the data for MBs (**A**) and MTs (**B**). The number of components are plotted on the x-axis against the percent of the variance explained on the y-axis. For both MBs and MTs, the first two principal components described more than 50% of the variance and were used for PCA.

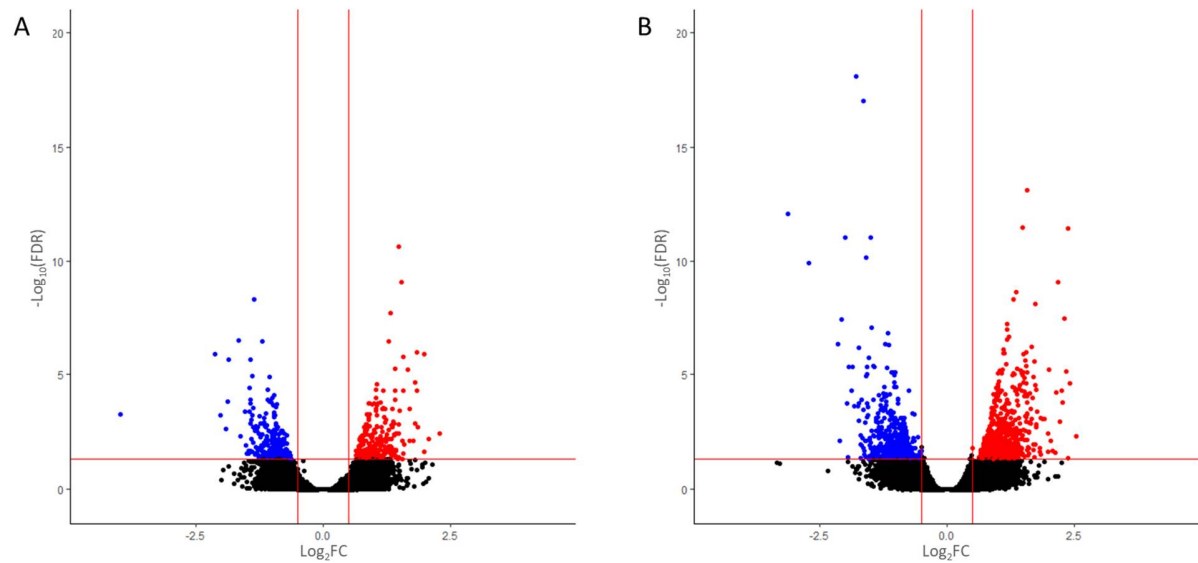

**Figure S3: Volcano plots.** The frequency profile of p-values is shown for MBs (A) and MTs (B). Data from the ~1.48 million CpG sites in common across all samples are plotted. The x-axis is the  $\log_2$  value for the fold change (ratio) of CP to non-CP CpG site methylation values and the y-axis is the negative  $\log_{10}$  FDR value. Red lines indicate LogFC greater than 0.5 or less than -0.5 and FDR < 0.05 (black = not significant, red = significantly hypermethylated in CP, blue = significantly hypomethylated in CP).

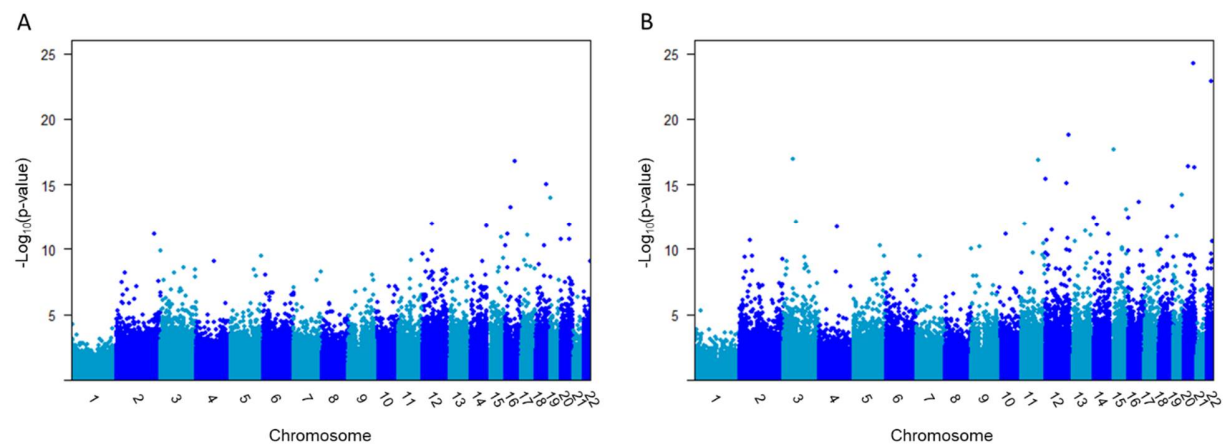

**Figure S4: Manhattan plots.** The negative logarithm of the p-value versus the chromosomal location for each of the ~1.48 million CpG sites is shown for MBs (A) and MTs (B).

**Table S1.** Cell culture information for each sample.

| <b>Sample</b>  | <b>PAX7+ %</b> | <b>Passage Number</b> | <b>Days to MB Collection</b> |
|----------------|----------------|-----------------------|------------------------------|
| CN1            | 98             | 3                     | 5                            |
| CN2            | 97             | 4                     | 2                            |
| CN3            | 99             | 4                     | 2                            |
| CN5            | 99             | 4                     | 3                            |
| CN4            | 98             | 4                     | 3                            |
| CN6            | 98             | 5                     | 3                            |
| <b>CN Mean</b> | <b>98.2</b>    | <b>4</b>              | <b>3.0</b>                   |
|                |                |                       |                              |
| CP4            | 92             | 3                     | 3                            |
| CP3            | 100            | 3                     | 2                            |
| CP2            | 100            | 5                     | 3                            |
| CP5            | 97             | 3                     | 3                            |
| CP6            | 99             | 4                     | 3                            |
| CP1            | 90             | 3                     | 4                            |
| <b>CP Mean</b> | <b>96.3</b>    | <b>3.5</b>            | <b>3.0</b>                   |

**Table S2.** Significant CpGs in MBs. LogFC = log<sub>2</sub> fold change; positive logFC = hypermethylated in CP; negative logFC = hypomethylated in CP; blank values for gene = intergenic regions. X's indicate sites within muscle genes or annotated enhancers.

| CpG site         | LogFC | FDR corrected p-value | Gene                | Muscle Gene | Enhancer Region |
|------------------|-------|-----------------------|---------------------|-------------|-----------------|
| chr16.0051277978 | -1.48 | 2.30E-11              | AC137527.2          |             |                 |
| chr18.0055106886 | -1.54 | 7.91E-10              | ONECUT2             |             |                 |
| chr19.0002867898 | 1.36  | 5.17E-09              | ZNF556              |             |                 |
| chr16.0029232332 | -1.33 | 2.05E-08              |                     |             |                 |
| chr14.0104759275 | 1.66  | 3.34E-07              |                     |             |                 |
| chr12.0053812491 | -1.29 | 3.37E-07              |                     |             |                 |
| chr20.0045674015 | 1.19  | 3.47E-07              | EYA2                |             |                 |
| chr16.0014797680 | -1.83 | 1.09E-06              | RP11-82O18.2        |             |                 |
| chr2.0207023289  | -1.97 | 1.22E-06              | NDUFS1              |             |                 |
| chr17.0034503322 | 2.13  | 1.24E-06              | CTB-91J4.1, TBC1D3B |             |                 |
| chr15.0078609028 | -1.58 | 1.66E-06              |                     |             |                 |
| chr20.0046478296 | 1.42  | 2.19E-06              |                     |             |                 |
| chr20.0000837287 | 1.85  | 2.25E-06              | FAM110A             |             |                 |
| chr16.0003062975 | -1.42 | 5.61E-06              | CLDN9               |             |                 |
| chr18.0043923940 | -1.66 | 5.84E-06              | RNF165              |             |                 |
| chr3.0001897820  | 1.39  | 1.20E-05              |                     |             |                 |
| chr12.0049484968 | 1.05  | 1.25E-05              | DHH, RP11-386G11.8  |             |                 |
| chr12.0001356415 | -1.80 | 2.10E-05              | ERC1                |             |                 |
| chr5.0171527362  | -1.05 | 2.61E-05              | STK10               |             |                 |
| chr15.0092982723 | 1.45  | 3.90E-05              | ST8SIA2             |             |                 |
| chr11.0070369682 | 1.09  | 4.71E-05              | SHANK2              |             |                 |
| chr4.0101719592  | -1.04 | 4.72E-05              | EMCN                |             |                 |
| chr22.0051206404 | -1.17 | 4.91E-05              | RPL23AP82, RABL2B   |             |                 |
| chr17.0014203257 | -1.57 | 5.05E-05              |                     |             |                 |
| chr12.0025342500 | -1.40 | 5.06E-05              | CASC1               |             | X               |
| chr14.0080449863 | -1.84 | 5.09E-05              |                     |             | X               |
| chr18.0012775069 | 0.97  | 7.79E-05              | RP11-973H7.1        |             |                 |
| chr17.0029150027 | -1.04 | 1.02E-04              | CRLF3               |             |                 |
| chr17.0049009115 | 1.00  | 1.08E-04              |                     |             |                 |
| chr16.0013247532 | 1.08  | 1.25E-04              | SHISA9              |             | X               |
| chr3.0127606140  | -1.40 | 1.26E-04              |                     |             |                 |
| chr15.0069824154 | 1.42  | 1.26E-04              | RP11-279F6.1        |             |                 |
| chr17.0070499160 | 1.04  | 1.42E-04              | LINC00511           |             |                 |
| chr5.0133179996  | 1.06  | 1.53E-04              |                     |             | X               |
| chr16.0067562199 | 1.87  | 1.54E-04              | FAM65A              |             |                 |
| chr12.0124320029 | 1.01  | 1.58E-04              | DNAH10              |             |                 |

|                  |       |          |                              |  |   |
|------------------|-------|----------|------------------------------|--|---|
| chr3.0195923929  | -1.13 | 1.58E-04 |                              |  |   |
| chr12.0114887843 | 1.42  | 1.83E-04 |                              |  |   |
| chr12.0016716975 | -0.90 | 1.85E-04 | MGST1, LMO3                  |  |   |
| chr15.0059214432 | -1.06 | 1.86E-04 | RNF111, SLTM                 |  |   |
| chr12.0109189987 | -1.00 | 1.88E-04 | SSH1                         |  |   |
| chr12.0051864464 | -0.90 | 1.89E-04 | SLC4A8                       |  |   |
| chr7.0149155842  | 0.90  | 2.00E-04 | ZNF777                       |  |   |
| chr12.0054428934 | -0.97 | 2.05E-04 | HOXC4, RP11-834C11.14, HOXC5 |  |   |
| chr2.0046167919  | -1.06 | 2.14E-04 | PRKCE                        |  |   |
| chr3.0075657744  | 0.97  | 2.18E-04 |                              |  |   |
| chr12.0131408548 | 0.92  | 2.57E-04 |                              |  |   |
| chr6.0016145414  | -1.17 | 2.93E-04 | MYLIP                        |  |   |
| chr9.0133233691  | 1.36  | 2.96E-04 | HMCN2                        |  |   |
| chr14.0100204041 | -1.35 | 3.04E-04 | EML1                         |  |   |
| chr14.0021177142 | -1.22 | 3.12E-04 |                              |  |   |
| chr12.0048360477 | -1.69 | 3.15E-04 | TMEM106C                     |  |   |
| chr5.0141817569  | -1.04 | 3.21E-04 | AC005592.2                   |  |   |
| chr18.0047177650 | -1.15 | 3.28E-04 |                              |  | X |
| chr18.0077704208 | -1.50 | 3.65E-04 | PQLC1                        |  |   |
| chr3.0195630444  | -1.04 | 3.92E-04 | TNK2                         |  |   |
| chr12.0032051620 | 1.52  | 4.01E-04 |                              |  |   |
| chr20.0048644582 | 1.44  | 4.25E-04 |                              |  |   |
| chr11.0065923292 | 0.97  | 4.58E-04 | PACS1                        |  |   |
| chr12.0119746133 | 0.97  | 4.62E-04 |                              |  |   |
| chr13.0060208310 | 1.12  | 4.92E-04 |                              |  |   |
| chr3.0017817015  | -0.90 | 5.51E-04 | TBC1D5                       |  |   |
| chr19.0048414587 | 3.97  | 5.53E-04 |                              |  |   |
| chr7.0129412947  | -0.85 | 5.66E-04 |                              |  |   |
| chr12.0101056159 | 0.97  | 5.72E-04 |                              |  |   |
| chr9.0139029439  | 1.38  | 5.78E-04 |                              |  | X |
| chr12.0056332772 | 0.96  | 5.87E-04 | DGKA                         |  |   |
| chr13.0036266089 | 0.94  | 6.00E-04 |                              |  |   |
| chr20.0060501154 | 2.02  | 6.06E-04 | CDH4                         |  |   |
| chr2.0235215325  | -1.05 | 6.11E-04 |                              |  |   |
| chr2.0029850455  | 1.24  | 6.71E-04 | ALK                          |  |   |
| chr13.0108997650 | -1.20 | 7.03E-04 |                              |  |   |
| chr20.0024608543 | 0.95  | 7.34E-04 | SYNDIG1                      |  |   |
| chr12.0127541139 | -0.89 | 7.96E-04 | RP11-575F12.1                |  |   |
| chr14.0035591938 | 1.15  | 8.20E-04 | KIAA0391                     |  |   |
| chr16.0004815786 | -0.89 | 8.91E-04 | ZNF500                       |  |   |
| chr20.0062778083 | 1.41  | 9.33E-04 |                              |  |   |

|                  |       |          |                              |   |   |
|------------------|-------|----------|------------------------------|---|---|
| chr12.0120338446 | -0.90 | 9.43E-04 |                              |   |   |
| chr20.0055369320 | -1.24 | 9.54E-04 |                              |   |   |
| chr12.0121475432 | -0.90 | 9.70E-04 | OASL                         |   |   |
| chr11.0123045794 | -1.36 | 1.12E-03 | CLMP                         |   |   |
| chr2.0110054189  | 1.16  | 1.24E-03 | SH3RF3                       |   |   |
| chr10.0081716405 | -1.20 | 1.30E-03 | SFTPD                        |   |   |
| chr14.0069029827 | 1.42  | 1.36E-03 | RAD51B                       |   |   |
| chr13.0112756716 | -1.40 | 1.37E-03 |                              |   |   |
| chr14.0105855078 | 1.24  | 1.37E-03 | PACS2                        |   |   |
| chr10.0116680012 | 0.92  | 1.38E-03 |                              |   |   |
| chr14.0073925622 | -1.79 | 1.40E-03 | NUMB                         |   |   |
| chr18.0021282448 | -0.84 | 1.46E-03 | LAMA3                        |   |   |
| chr14.0096510341 | -0.86 | 1.47E-03 | C14orf132                    |   |   |
| chr7.0002555562  | 1.16  | 1.51E-03 | LFNG                         |   |   |
| chr13.0107190658 | -1.48 | 1.52E-03 |                              |   |   |
| chr3.0112241221  | -0.87 | 1.62E-03 |                              |   |   |
| chr15.0069678825 | 1.10  | 1.66E-03 | PAQR5                        |   |   |
| chr12.0056048792 | 0.93  | 1.67E-03 | RP11-644F5.16, RP11-644F5.15 |   |   |
| chr18.0011021280 | -1.34 | 1.72E-03 | PIEZO2                       |   | X |
| chr11.0062248057 | 1.14  | 1.77E-03 | AHNAK                        |   |   |
| chr2.0056193463  | 1.32  | 1.78E-03 | RP11-481J13.1, AC011306.2    |   |   |
| chr9.0092292403  | -1.06 | 1.85E-03 |                              |   |   |
| chr14.0094883780 | -0.90 | 1.86E-03 |                              |   |   |
| chr3.0060919598  | -0.85 | 1.88E-03 | FHIT                         |   |   |
| chr10.0130653464 | 1.36  | 1.91E-03 |                              |   |   |
| chr12.0095901262 | 1.12  | 1.91E-03 | METAP2                       |   |   |
| chr17.0018941025 | -1.85 | 1.92E-03 | GRAP                         |   |   |
| chr14.0080475557 | 0.89  | 1.92E-03 |                              |   |   |
| chr20.0052825772 | -1.35 | 1.93E-03 | PFDN4                        |   |   |
| chr20.0003110156 | -0.80 | 1.94E-03 | UBOX5-AS1, UBOX5             |   |   |
| chr14.0038206052 | -1.05 | 1.98E-03 | TTC6                         |   |   |
| chr3.0119863345  | 1.28  | 2.04E-03 | GPR156                       |   |   |
| chr3.0119990864  | -1.14 | 2.04E-03 | GPR156                       |   |   |
| chr13.0027580970 | 1.91  | 2.33E-03 |                              |   |   |
| chr3.0107294807  | -0.83 | 2.35E-03 | BBX                          |   |   |
| chr15.0079214816 | 0.93  | 2.35E-03 | CTSH                         |   |   |
| chr22.0019752899 | 0.91  | 2.35E-03 | TBX1                         | X |   |
| chr9.0036492536  | -0.86 | 2.53E-03 |                              |   |   |
| chr12.0072524007 | 0.97  | 2.62E-03 | TPH2, TRHDE                  |   |   |
| chr18.0011467550 | -0.99 | 2.63E-03 | RP11-128P17.3                |   |   |
| chr6.0043541893  | -1.28 | 2.70E-03 | XPO5                         |   |   |



|                  |       |          |                                 |  |  |
|------------------|-------|----------|---------------------------------|--|--|
| chr6.0052623375  | 1.33  | 2.91E-03 | GSTA2                           |  |  |
| chr6.0170399029  | 0.82  | 2.92E-03 |                                 |  |  |
| chr14.0076248154 | -0.81 | 2.93E-03 | TTLL5                           |  |  |
| chr2.0241908694  | 1.07  | 2.94E-03 | AC104809.3                      |  |  |
| chr6.0019413218  | 0.81  | 2.94E-03 |                                 |  |  |
| chr20.0056593028 | 1.31  | 2.95E-03 |                                 |  |  |
| chr18.0033355015 | 0.99  | 3.03E-03 |                                 |  |  |
| chr20.0062083383 | -1.16 | 3.19E-03 | KCNQ2                           |  |  |
| chr17.0038462448 | 1.03  | 3.23E-03 |                                 |  |  |
| chr2.0033057636  | -0.84 | 3.39E-03 | LINC00486                       |  |  |
| chr12.0002910617 | -1.01 | 3.39E-03 | FKBP4, RP4-816N1.6, RP4-816N1.7 |  |  |
| chr11.0127179783 | 0.84  | 3.50E-03 | RP11-480C22.1                   |  |  |
| chr20.0061968208 | 1.26  | 3.62E-03 |                                 |  |  |
| chr14.0104190006 | -1.48 | 3.70E-03 | ZFYVE21                         |  |  |
| chr6.0161063597  | -2.29 | 3.71E-03 | LPA                             |  |  |
| chr6.0168745680  | 0.92  | 3.72E-03 |                                 |  |  |
| chr10.0114569149 | 0.77  | 3.72E-03 | VTI1A                           |  |  |
| chr9.0139231307  | -0.83 | 3.73E-03 | GP5M1                           |  |  |
| chr12.0018457486 | -1.42 | 3.75E-03 | RERGL, PIK3C2G                  |  |  |
| chr12.0105147522 | -0.97 | 3.84E-03 | CHST11                          |  |  |
| chr18.0030805847 | -0.82 | 4.17E-03 | CCDC178                         |  |  |
| chr15.0101632053 | -1.25 | 4.17E-03 |                                 |  |  |
| chr14.0104733862 | -0.84 | 4.25E-03 | RP11-260M19.2                   |  |  |
| chr3.0141524375  | -1.39 | 4.26E-03 | GRK7                            |  |  |
| chr12.0003241735 | 1.19  | 4.26E-03 | TSPAN9                          |  |  |
| chr12.0110324807 | -0.79 | 4.28E-03 | RP1-7G5.6                       |  |  |
| chr14.0083607338 | 0.97  | 4.29E-03 |                                 |  |  |
| chr2.0242587453  | 0.86  | 4.31E-03 | ATG4B                           |  |  |
| chr12.0016028478 | -0.94 | 4.46E-03 | EPS8                            |  |  |
| chr11.0120302298 | -0.76 | 4.47E-03 | ARHGEF12                        |  |  |
| chr21.0030689317 | -0.78 | 4.48E-03 | BACH1                           |  |  |
| chr14.0085404000 | -1.38 | 4.49E-03 |                                 |  |  |
| chr16.0028329253 | -0.90 | 4.50E-03 | SBK1                            |  |  |
| chr11.0089386768 | 0.72  | 4.50E-03 | FOLH1B                          |  |  |
| chr6.0035412073  | 1.00  | 4.69E-03 | MKRN2                           |  |  |
| chr16.0079468883 | 1.11  | 4.80E-03 |                                 |  |  |
| chr12.0083436417 | 1.62  | 4.93E-03 | TMT2                            |  |  |
| chr14.0102685905 | -1.13 | 4.96E-03 | WDR20                           |  |  |
| chr22.0018624236 | -0.79 | 4.96E-03 | TUBA8                           |  |  |
| chr18.0021082035 | 1.00  | 5.00E-03 |                                 |  |  |
| chr11.0018392462 | -0.72 | 5.23E-03 |                                 |  |  |

|                  |       |          |                       |   |   |
|------------------|-------|----------|-----------------------|---|---|
| chr3.0033354536  | -0.97 | 5.42E-03 | FBXL2                 |   |   |
| chr20.0046839598 | 1.22  | 5.59E-03 |                       |   |   |
| chr20.0003681200 | 0.95  | 5.65E-03 | SIGLEC1               |   |   |
| chr12.0007270902 | -0.94 | 5.78E-03 | C1RL-AS1              |   |   |
| chr22.0050332646 | -1.23 | 5.81E-03 |                       |   |   |
| chr13.0033220266 | -1.24 | 5.85E-03 | PDS5B                 |   |   |
| chr2.0101235133  | -0.77 | 5.88E-03 |                       |   |   |
| chr12.0003412978 | 0.77  | 6.31E-03 |                       |   |   |
| chr18.0019179732 | -2.07 | 6.32E-03 | ESCO1                 |   |   |
| chr22.0043245863 | -0.73 | 6.43E-03 | ARFGAP3, PACSIN2      |   |   |
| chr14.0023826830 | -1.12 | 6.45E-03 | EFS                   |   |   |
| chr11.0108812687 | -0.71 | 6.48E-03 |                       |   |   |
| chr16.0067003618 | 0.78  | 6.49E-03 | CES3                  |   |   |
| chr14.0070145650 | -1.06 | 6.50E-03 | KIAA0247              |   |   |
| chr13.0047191668 | -1.30 | 6.51E-03 | LRCH1                 |   |   |
| chr20.0061078379 | 1.11  | 6.52E-03 |                       |   |   |
| chr17.0017713313 | 0.96  | 6.52E-03 | RAI1                  |   |   |
| chr12.0002464403 | -1.33 | 6.55E-03 | CACNA1C               | X |   |
| chr16.0020279909 | -1.11 | 6.55E-03 |                       |   | X |
| chr18.0045207364 | 1.40  | 6.71E-03 |                       |   |   |
| chr12.0064441275 | -1.21 | 6.72E-03 | SRGAP1, RP11-196H14.2 |   |   |
| chr9.0124320846  | 0.87  | 6.75E-03 |                       |   |   |
| chr6.0036400034  | 1.02  | 7.00E-03 | PXT1                  |   |   |
| chr18.0072250823 | 1.12  | 7.08E-03 | CNDP1                 |   |   |
| chr3.0013864864  | -0.72 | 7.10E-03 | WNT7A                 |   |   |
| chr22.0047857822 | -0.96 | 7.57E-03 | LL22NC03-75H12.2      |   |   |
| chr12.0116630659 | -0.79 | 7.58E-03 | MED13L                |   |   |
| chr9.0115938896  | 0.79  | 7.60E-03 | FKBP15                |   | X |
| chr14.0056763462 | -1.14 | 7.60E-03 | PELI2                 |   |   |
| chr16.0074454096 | 0.91  | 7.61E-03 | CLEC18B               |   |   |
| chr17.0019045779 | -1.55 | 7.71E-03 | GRAPL, CTC-457L16.2   |   |   |
| chr13.0107176083 | -1.69 | 7.73E-03 | EFNB2                 |   |   |
| chr3.0046499569  | -0.84 | 7.84E-03 | LTF                   |   |   |
| chr11.0009112240 | -0.79 | 7.88E-03 | SCUBE2                |   |   |
| chr19.0045378240 | 0.87  | 8.05E-03 | PVRL2                 |   |   |
| chr11.0062533046 | -0.77 | 8.09E-03 | POLR2G                |   |   |
| chr3.0046979919  | 1.08  | 8.14E-03 | CCDC12                |   |   |
| chr12.0069834797 | 0.98  | 8.21E-03 |                       |   |   |
| chr15.0037402654 | -1.76 | 8.22E-03 |                       |   |   |
| chr2.0028466430  | -0.76 | 8.33E-03 | BRE                   |   |   |
| chr3.0197251389  | -0.77 | 8.35E-03 | BDH1                  |   |   |

|                  |       |          |                  |   |   |
|------------------|-------|----------|------------------|---|---|
| chr16.0077912976 | -1.23 | 8.46E-03 | VAT1L            |   |   |
| chr18.0056701704 | 0.98  | 8.79E-03 | OACYLP           |   |   |
| chr10.0103757273 | 0.77  | 8.81E-03 | C10orf76         |   |   |
| chr22.0050305243 | -0.78 | 8.83E-03 | ALG12            |   |   |
| chr11.0008743403 | 1.15  | 9.04E-03 | ST5              |   |   |
| chr10.0020132012 | 0.77  | 9.14E-03 | PLXDC2           |   |   |
| chr8.0041168893  | -1.07 | 9.31E-03 |                  |   |   |
| chr4.0166097490  | -0.74 | 9.33E-03 | TMEM192          |   |   |
| chr6.0154640863  | 1.37  | 9.64E-03 | IPCEF1           |   |   |
| chr22.0050620859 | -0.77 | 9.89E-03 |                  |   |   |
| chr20.0062049798 | -1.08 | 9.89E-03 |                  |   |   |
| chr2.0071864693  | -1.13 | 9.98E-03 | DYSF             | X |   |
| chr18.0019601842 | 0.99  | 1.00E-02 | RP11-595B24.1    |   |   |
| chr18.0020836978 | 0.98  | 1.00E-02 | CABLES1, TMEM241 |   |   |
| chr12.0039914797 | -0.89 | 1.00E-02 |                  |   |   |
| chr2.0035092870  | -1.09 | 1.00E-02 | AC012593.1       |   |   |
| chr5.0115935698  | 0.74  | 1.01E-02 |                  |   |   |
| chr15.0024672858 | 1.12  | 1.02E-02 |                  |   |   |
| chr17.0036416584 | 0.73  | 1.03E-02 | RP11-1407O15.2   |   |   |
| chr5.0166472226  | -1.03 | 1.03E-02 |                  |   |   |
| chr3.0038031943  | -0.79 | 1.03E-02 | VILL             |   |   |
| chr3.0126094904  | 0.79  | 1.06E-02 |                  |   | X |
| chr12.0129876695 | 0.73  | 1.08E-02 | TMEM132D         |   |   |
| chr3.0046643520  | 0.71  | 1.08E-02 | TDGF1            |   |   |
| chr3.0062838161  | 0.81  | 1.09E-02 | CADPS            |   |   |
| chr8.0038241237  | -0.77 | 1.09E-02 |                  |   |   |
| chr20.0025442435 | 0.91  | 1.13E-02 | NINL             |   |   |
| chr13.0071457891 | 0.84  | 1.14E-02 |                  |   |   |
| chr20.0033883939 | -1.58 | 1.17E-02 |                  |   |   |
| chr6.0122837153  | -0.78 | 1.17E-02 | PKIB             |   |   |
| chr14.0023701059 | 0.79  | 1.17E-02 | C14orf164        |   |   |
| chr17.0002235852 | -0.73 | 1.17E-02 | TSR1             |   |   |
| chr7.0016768868  | -0.75 | 1.18E-02 |                  |   |   |
| chr8.0041168336  | 1.09  | 1.18E-02 |                  |   |   |
| chr20.0059528314 | -1.06 | 1.18E-02 |                  |   |   |
| chr20.0043335999 | 1.21  | 1.20E-02 | RP11-445H22.4    |   |   |
| chr15.0061267563 | 0.98  | 1.20E-02 | RORA             |   |   |
| chr14.0028616430 | 0.90  | 1.20E-02 |                  |   |   |
| chr22.0045949021 | -1.04 | 1.20E-02 | FBLN1            |   |   |
| chr16.0084205031 | -0.93 | 1.21E-02 | DNAAF1           |   |   |
| chr9.0038111399  | 0.88  | 1.21E-02 |                  |   |   |

|                  |       |          |                     |   |   |
|------------------|-------|----------|---------------------|---|---|
| chr18.0007824130 | -1.16 | 1.21E-02 | PTPRM               |   |   |
| chr11.0067273409 | 1.09  | 1.22E-02 | PITPNM1             |   |   |
| chr13.0027424109 | 1.51  | 1.22E-02 |                     |   | X |
| chr6.0007447123  | -1.02 | 1.29E-02 |                     |   |   |
| chr15.0038006605 | 0.89  | 1.30E-02 |                     |   |   |
| chr12.0027821943 | -0.99 | 1.30E-02 | PPFIBP1             |   |   |
| chr20.0003441625 | -1.28 | 1.31E-02 |                     |   |   |
| chr19.0004634744 | 0.98  | 1.32E-02 |                     |   |   |
| chr12.0039929800 | -1.20 | 1.35E-02 |                     |   |   |
| chr20.0037481710 | -0.90 | 1.37E-02 | PPP1R16B            |   |   |
| chr11.0134296018 | 1.17  | 1.37E-02 |                     |   |   |
| chr9.0101561563  | -0.72 | 1.38E-02 |                     |   |   |
| chr12.0111017742 | -0.70 | 1.38E-02 | PPTC7               |   |   |
| chr14.0067989640 | -1.12 | 1.39E-02 | TMEM229B            |   |   |
| chr16.0011016948 | -0.96 | 1.40E-02 | CIITA               |   |   |
| chr12.0118509696 | -0.73 | 1.41E-02 | VSIG10              |   |   |
| chr12.0116068191 | -1.32 | 1.41E-02 | RP11-1028N23.4      |   |   |
| chr17.0028803808 | -1.20 | 1.47E-02 |                     |   |   |
| chr14.0025947530 | 0.91  | 1.48E-02 |                     |   |   |
| chr22.0020613685 | 0.86  | 1.48E-02 | AC011718.1          |   |   |
| chr12.0009243798 | 0.88  | 1.48E-02 | A2M                 |   |   |
| chr11.0047489314 | 0.98  | 1.49E-02 | CELF1               |   |   |
| chr11.0090180873 | 1.32  | 1.49E-02 | DISC1FP1            |   |   |
| chr12.0109848872 | -0.97 | 1.51E-02 | MYO1H               |   |   |
| chr3.0189791239  | -1.34 | 1.55E-02 | LEPREL1             |   |   |
| chr18.0075332957 | 1.22  | 1.55E-02 |                     |   |   |
| chr15.0021241379 | 0.84  | 1.56E-02 |                     |   |   |
| chr3.0053784559  | 0.91  | 1.57E-02 | CACNA1D             | X |   |
| chr14.0061385863 | -1.02 | 1.58E-02 | MNAT1, RP11-193F5.1 |   |   |
| chr11.0129565594 | 1.28  | 1.59E-02 |                     |   |   |
| chr11.0016936211 | 0.88  | 1.59E-02 | PLEKHA7             |   |   |
| chr20.0043953416 | 1.02  | 1.59E-02 |                     |   |   |
| chr7.0044621160  | 0.91  | 1.71E-02 | TMED4               |   |   |
| chr3.0176960084  | -0.69 | 1.71E-02 |                     |   |   |
| chr15.0046178808 | -0.97 | 1.71E-02 | RP11-718O11.1       |   |   |
| chr11.0131850680 | 0.88  | 1.74E-02 | NTM                 |   |   |
| chr3.0194597824  | -1.29 | 1.74E-02 |                     |   |   |
| chr9.0123508761  | -0.85 | 1.74E-02 |                     |   |   |
| chr20.0001916618 | -1.25 | 1.78E-02 | SIRPA               |   |   |
| chr9.0019169503  | 0.73  | 1.79E-02 |                     |   |   |
| chr14.0075694331 | -0.89 | 1.83E-02 |                     |   |   |

|                  |       |          |                        |   |   |
|------------------|-------|----------|------------------------|---|---|
| chr18.0033652604 | 0.97  | 1.84E-02 |                        |   |   |
| chr11.0127193165 | 0.72  | 1.90E-02 |                        |   |   |
| chr13.0024636355 | -1.10 | 1.93E-02 | RP11-307N16.6, SPATA13 |   |   |
| chr12.0123727933 | -1.03 | 1.93E-02 | MPHOSPH9, C12orf65     |   |   |
| chr20.0004374415 | -1.43 | 1.94E-02 |                        |   |   |
| chr18.0047230566 | -1.39 | 1.98E-02 |                        |   | X |
| chr3.0013175389  | -1.04 | 1.99E-02 |                        |   |   |
| chr19.0041126191 | -0.80 | 1.99E-02 | LTBP4                  |   |   |
| chr18.0053360011 | 1.01  | 2.00E-02 |                        |   |   |
| chr5.0155939097  | -0.86 | 2.03E-02 | SGCD                   | X |   |
| chr11.0046403972 | 1.06  | 2.03E-02 | MDK                    |   |   |
| chr6.0167402538  | -0.72 | 2.07E-02 | RP1-167A14.2           |   |   |
| chr16.0069786693 | 0.75  | 2.07E-02 | NOB1                   |   |   |
| chr12.0056095087 | -1.17 | 2.13E-02 | ITGA7                  | X |   |
| chr12.0114047563 | -1.42 | 2.18E-02 |                        |   |   |
| chr12.0131689822 | 1.29  | 2.18E-02 | RP11-638F5.1           |   |   |
| chr3.0124562223  | 0.98  | 2.19E-02 | ITGB5                  | X |   |
| chr15.0090525709 | 1.46  | 2.19E-02 |                        |   |   |
| chr22.0050349213 | 1.20  | 2.19E-02 |                        |   |   |
| chr3.0009739416  | -0.89 | 2.20E-02 | MTMR14                 |   |   |
| chr20.0039452845 | -0.95 | 2.21E-02 |                        |   |   |
| chr3.0197237955  | -0.81 | 2.21E-02 |                        |   |   |
| chr14.0021316565 | -1.29 | 2.22E-02 |                        |   |   |
| chr20.0059724480 | 1.42  | 2.22E-02 |                        |   |   |
| chr17.0072850038 | 0.81  | 2.22E-02 | GRIN2C                 |   |   |
| chr11.0131635593 | -0.82 | 2.22E-02 |                        |   |   |
| chr22.0023191105 | 0.74  | 2.22E-02 |                        |   |   |
| chr11.0070808370 | -0.64 | 2.24E-02 |                        |   |   |
| chr14.0023876911 | -1.08 | 2.25E-02 | MYH6                   | X |   |
| chr12.0008027124 | 0.85  | 2.26E-02 | SLC2A14                |   |   |
| chr13.0020794750 | 0.98  | 2.26E-02 |                        |   |   |
| chr6.0008948266  | 1.16  | 2.27E-02 |                        |   |   |
| chr9.0131024026  | -0.69 | 2.27E-02 | GOLGA2                 |   |   |
| chr12.0117047937 | -0.69 | 2.28E-02 |                        |   |   |
| chr18.0021435392 | 0.93  | 2.28E-02 |                        |   |   |
| chr6.0031008851  | 0.96  | 2.29E-02 | RASSF3                 |   |   |
| chr12.0065005764 | -1.34 | 2.29E-02 |                        |   |   |
| chr11.0000821322 | 1.38  | 2.29E-02 | PNPLA2                 |   |   |
| chr3.0034906342  | -0.85 | 2.29E-02 |                        |   | X |
| chr5.0100843674  | 0.73  | 2.29E-02 |                        |   |   |
| chr7.0016504755  | 0.80  | 2.29E-02 | SOSTDC1                |   |   |

|                  |       |          |                    |  |  |
|------------------|-------|----------|--------------------|--|--|
| chr19.0049703565 | -0.73 | 2.29E-02 | TRPM4              |  |  |
| chr14.0104119867 | -1.98 | 2.29E-02 | KLC1, RP11-73M18.2 |  |  |
| chr20.0031210733 | 1.20  | 2.29E-02 |                    |  |  |
| chr2.0003882321  | 0.88  | 2.29E-02 |                    |  |  |
| chr15.0055228849 | 1.03  | 2.29E-02 |                    |  |  |
| chr20.0013130466 | 1.04  | 2.30E-02 | SPTLC3             |  |  |
| chr6.0010385427  | -1.35 | 2.31E-02 |                    |  |  |
| chr3.0134320672  | -0.92 | 2.37E-02 | EPHB1              |  |  |
| chr13.0044928237 | -0.87 | 2.39E-02 |                    |  |  |
| chr3.0148627752  | 0.89  | 2.40E-02 | RP11-680B3.2       |  |  |
| chr10.0003512410 | -0.97 | 2.43E-02 |                    |  |  |
| chr3.0103216920  | 0.78  | 2.46E-02 |                    |  |  |
| chr20.0031015233 | -0.83 | 2.47E-02 | ASXL1              |  |  |
| chr5.0011534641  | 0.90  | 2.48E-02 | CTNND2             |  |  |
| chr20.0020806502 | -0.90 | 2.48E-02 |                    |  |  |
| chr9.0137156003  | 0.90  | 2.48E-02 |                    |  |  |
| chr18.0057103282 | 0.93  | 2.48E-02 | CCBE1              |  |  |
| chr15.0069901941 | 0.91  | 2.48E-02 | RP11-279F6.3       |  |  |
| chr14.0105384756 | 1.30  | 2.49E-02 |                    |  |  |
| chr8.0042348640  | -1.02 | 2.50E-02 | SLC20A2            |  |  |
| chr10.0011491536 | 0.71  | 2.50E-02 |                    |  |  |
| chr5.0164483805  | -0.92 | 2.50E-02 | CTC-340A15.2       |  |  |
| chr22.0025365026 | 0.83  | 2.52E-02 | KIAA1671           |  |  |
| chr10.0024327589 | -0.87 | 2.52E-02 | KIAA1217           |  |  |
| chr12.0117143952 | -0.82 | 2.53E-02 |                    |  |  |
| chr14.0036939568 | 1.00  | 2.58E-02 |                    |  |  |
| chr20.0049033760 | -1.31 | 2.61E-02 |                    |  |  |
| chr12.0085683529 | 0.95  | 2.62E-02 | ALX1               |  |  |
| chr22.0029706927 | -1.24 | 2.62E-02 | GAS2L1             |  |  |
| chr20.0062149183 | -1.00 | 2.62E-02 |                    |  |  |
| chr12.0130994695 | -0.95 | 2.63E-02 | RIMBP2             |  |  |
| chr17.0070895822 | -0.68 | 2.66E-02 | SLC39A11           |  |  |
| chr11.0066622735 | 0.65  | 2.66E-02 | PC                 |  |  |
| chr6.0002286209  | 0.95  | 2.70E-02 | GMDS-AS1           |  |  |
| chr15.0027477685 | -1.00 | 2.71E-02 | GABRG3             |  |  |
| chr3.0048310078  | 1.02  | 2.71E-02 | ZNF589             |  |  |
| chr13.0023270862 | 0.77  | 2.71E-02 |                    |  |  |
| chr18.0045011716 | 1.10  | 2.72E-02 | CTD-2130O13.1      |  |  |
| chr18.0059531531 | -0.78 | 2.72E-02 | RNF152             |  |  |
| chr9.0109806856  | -0.92 | 2.73E-02 | RP11-508N12.2      |  |  |
| chr8.0058130120  | -0.70 | 2.73E-02 | RP11-513O17.2      |  |  |

|                  |       |          |                             |  |   |
|------------------|-------|----------|-----------------------------|--|---|
| chr12.0124936839 | -1.05 | 2.76E-02 | NCOR2                       |  |   |
| chr16.0079745969 | 0.88  | 2.79E-02 | RP11-345M22.1               |  |   |
| chr3.0033102830  | -0.84 | 2.79E-02 | GLB1                        |  |   |
| chr17.0010478124 | 0.73  | 2.80E-02 | CTC-297N7.11                |  |   |
| chr13.0033684630 | 1.46  | 2.84E-02 | STARD13                     |  |   |
| chr10.0015273527 | -0.70 | 2.85E-02 | FAM171A1                    |  |   |
| chr15.0097407473 | -0.82 | 2.89E-02 |                             |  |   |
| chr20.0060186448 | -1.56 | 2.93E-02 |                             |  |   |
| chr17.0061612901 | 0.79  | 2.93E-02 | KCNH6                       |  |   |
| chr15.0053264991 | -0.91 | 2.93E-02 |                             |  |   |
| chr2.0242102221  | -0.94 | 2.94E-02 | PPP1R7                      |  |   |
| chr13.0093896533 | 1.50  | 2.95E-02 | GPC6                        |  |   |
| chr18.0070751712 | -0.97 | 2.96E-02 |                             |  |   |
| chr3.0158464604  | 0.67  | 2.99E-02 | MFSD1, RP11-379F4.4         |  |   |
| chr15.0045111673 | -1.20 | 3.00E-02 |                             |  |   |
| chr15.0090574827 | 1.15  | 3.02E-02 | ZNF710                      |  |   |
| chr5.0072485778  | 1.10  | 3.02E-02 |                             |  |   |
| chr15.0057858330 | 0.90  | 3.03E-02 |                             |  |   |
| chr17.0077808736 | 0.93  | 3.03E-02 | CBX4                        |  |   |
| chr12.0096032685 | 1.34  | 3.04E-02 |                             |  |   |
| chr2.0230915720  | 0.85  | 3.04E-02 | SLC16A14                    |  |   |
| chr12.0094153261 | 1.13  | 3.06E-02 | CRADD                       |  |   |
| chr12.0110028502 | -0.87 | 3.06E-02 | MVK                         |  |   |
| chr22.0049023822 | 0.74  | 3.10E-02 | FAM19A5                     |  | X |
| chr9.0095057658  | -0.90 | 3.10E-02 |                             |  |   |
| chr8.0027800853  | 0.67  | 3.11E-02 | SCARA5                      |  |   |
| chr14.0073426628 | -0.98 | 3.18E-02 |                             |  |   |
| chr6.0123159641  | 0.88  | 3.20E-02 |                             |  |   |
| chr12.0117440300 | -0.90 | 3.21E-02 | FBXW8                       |  |   |
| chr2.0241639679  | 1.27  | 3.23E-02 |                             |  |   |
| chr12.0128167651 | 1.13  | 3.27E-02 |                             |  |   |
| chr11.0065933711 | 0.79  | 3.27E-02 |                             |  |   |
| chr19.0042929177 | 0.70  | 3.27E-02 | LIPE-AS1, LIPE, CTB-50E14.4 |  |   |
| chr20.0042729620 | -1.11 | 3.27E-02 |                             |  |   |
| chr15.0068286485 | -0.85 | 3.28E-02 |                             |  |   |
| chr17.0074566299 | 0.87  | 3.28E-02 | ST6GALNAC2, RP11-666A8.9    |  |   |
| chr16.0010390919 | 0.91  | 3.28E-02 |                             |  |   |
| chr12.0056333039 | 0.90  | 3.28E-02 |                             |  |   |
| chr7.0147581299  | -0.68 | 3.29E-02 | CNTNAP2                     |  |   |
| chr6.0025139941  | -1.02 | 3.32E-02 | CMAHP                       |  |   |
| chr12.0050500877 | 0.83  | 3.32E-02 | GPD1                        |  |   |

|                  |       |          |                            |  |   |
|------------------|-------|----------|----------------------------|--|---|
| chr15.0093801101 | 0.74  | 3.32E-02 | RP11-326A13.1              |  |   |
| chr6.0037514594  | 0.84  | 3.32E-02 | RP1-153P14.5, RP1-153P14.3 |  |   |
| chr18.0048375821 | -1.04 | 3.33E-02 |                            |  |   |
| chr3.0055881684  | -0.88 | 3.33E-02 | ERC2                       |  |   |
| chr9.0068235180  | 0.63  | 3.33E-02 |                            |  |   |
| chr14.0075405758 | -0.91 | 3.37E-02 |                            |  |   |
| chr12.0056755177 | -1.17 | 3.38E-02 | APOF                       |  |   |
| chr14.0029181235 | 0.79  | 3.39E-02 |                            |  |   |
| chr20.0052351842 | -1.01 | 3.42E-02 |                            |  |   |
| chr22.0037334249 | -0.76 | 3.47E-02 | CSF2RB                     |  |   |
| chr5.0116309052  | 0.81  | 3.50E-02 |                            |  |   |
| chr9.0121931878  | -1.35 | 3.50E-02 | BRINP1                     |  |   |
| chr14.0060810689 | 0.98  | 3.51E-02 |                            |  |   |
| chr17.0052639919 | -1.12 | 3.51E-02 |                            |  |   |
| chr11.0017832522 | -0.95 | 3.51E-02 | SERGEF                     |  |   |
| chr20.0057144398 | -1.05 | 3.52E-02 | APCDD1L-AS1                |  |   |
| chr17.0037449771 | -0.64 | 3.53E-02 | FBXL20                     |  |   |
| chr3.0196595774  | -1.37 | 3.53E-02 | SENP5                      |  |   |
| chr13.0099687193 | 1.01  | 3.53E-02 | DOCK9                      |  |   |
| chr14.0102174978 | -1.41 | 3.55E-02 | RP11-1029J19.5             |  |   |
| chr3.0168473460  | -0.88 | 3.55E-02 | EGFEM1P                    |  |   |
| chr18.0002417135 | -0.87 | 3.55E-02 |                            |  |   |
| chr18.0060803911 | -1.13 | 3.55E-02 | BCL2                       |  |   |
| chr17.0035398896 | -0.69 | 3.57E-02 | AATF, CTC-268N12.3         |  |   |
| chr14.0101254911 | -0.75 | 3.58E-02 | MEG3                       |  |   |
| chr4.0068334446  | 0.66  | 3.59E-02 |                            |  | X |
| chr8.0099957010  | -1.09 | 3.64E-02 | OSR2                       |  |   |
| chr6.0083334853  | 0.66  | 3.65E-02 |                            |  |   |
| chr15.0039742794 | -0.76 | 3.65E-02 |                            |  |   |
| chr6.0134589430  | -1.04 | 3.73E-02 | SGK1                       |  |   |
| chr15.0093177616 | 1.01  | 3.75E-02 | FAM174B                    |  |   |
| chr12.0124895363 | 0.97  | 3.76E-02 |                            |  |   |
| chr20.0062550242 | -0.78 | 3.80E-02 | DNAJC5                     |  | X |
| chr18.0022623623 | -0.91 | 3.81E-02 |                            |  |   |
| chr3.0182124231  | -1.14 | 3.81E-02 |                            |  | X |
| chr20.0041428080 | 0.87  | 3.81E-02 | PTPRT                      |  |   |
| chr12.0120727765 | -1.34 | 3.82E-02 |                            |  |   |
| chr2.0148097446  | 0.70  | 3.83E-02 |                            |  |   |
| chr17.0039250188 | 0.80  | 3.83E-02 |                            |  |   |
| chr2.0009912902  | -0.70 | 3.83E-02 |                            |  |   |
| chr2.0217502199  | 0.87  | 3.87E-02 | IGFBP2                     |  |   |



|                  |       |          |                             |   |   |
|------------------|-------|----------|-----------------------------|---|---|
| chr2.0232111330  | 0.69  | 3.87E-02 | ARMC9                       |   |   |
| chr5.0039219698  | 1.22  | 3.90E-02 | FYB                         |   |   |
| chr20.0013332818 | 0.88  | 3.90E-02 | TASP1                       |   |   |
| chr6.0148815687  | 0.99  | 3.92E-02 | SASH1                       |   |   |
| chr17.0015366928 | 1.10  | 3.92E-02 | CDRT4, TVP23C-CDRT4, TVP23C |   |   |
| chr5.0108133030  | -0.71 | 3.96E-02 | FER                         |   |   |
| chr12.0085862864 | -1.18 | 3.98E-02 |                             |   |   |
| chr15.0069686871 | 1.17  | 3.98E-02 |                             |   |   |
| chr17.0017096165 | -1.00 | 3.99E-02 | MPRIP                       |   |   |
| chr13.0109856377 | -1.48 | 3.99E-02 | MYO16                       |   | X |
| chr22.0043582319 | 1.08  | 3.99E-02 | TTLL12                      |   |   |
| chr20.0030641297 | 0.99  | 4.00E-02 | HCK                         |   |   |
| chr3.0050412109  | -0.83 | 4.01E-02 | CACNA2D2                    |   |   |
| chr14.0094511641 | -0.90 | 4.03E-02 | OTUB2                       |   |   |
| chr16.0084618353 | 0.93  | 4.03E-02 | COTL1                       |   |   |
| chr9.0003201208  | -0.79 | 4.07E-02 |                             |   |   |
| chr2.0223166989  | 0.87  | 4.07E-02 | CCDC140                     |   |   |
| chr12.0104998453 | 1.26  | 4.21E-02 |                             |   |   |
| chr20.0058031564 | 0.93  | 4.22E-02 |                             |   |   |
| chr3.0112947928  | -1.11 | 4.23E-02 | BOC                         |   |   |
| chr6.0037113416  | -0.73 | 4.24E-02 |                             |   |   |
| chr14.0073118040 | -1.42 | 4.26E-02 | DPF3                        |   |   |
| chr11.0122086249 | 1.23  | 4.29E-02 | RP11-820L6.1                |   |   |
| chr19.0013700380 | 1.10  | 4.31E-02 | CACNA1A                     |   |   |
| chr10.0125233252 | 0.82  | 4.34E-02 | RP11-282I1.1                |   |   |
| chr12.0055783991 | 1.19  | 4.34E-02 |                             |   |   |
| chr8.0142865287  | 0.64  | 4.34E-02 |                             |   |   |
| chr2.0225889464  | -1.00 | 4.35E-02 | DOCK10                      |   |   |
| chr20.0030177138 | -0.93 | 4.35E-02 |                             |   |   |
| chr22.0033790923 | 0.66  | 4.36E-02 | LARGE1                      | X |   |
| chr15.0051979269 | 0.92  | 4.43E-02 | SCG3                        |   |   |
| chr8.0145165331  | -0.68 | 4.45E-02 | KIAA1875                    |   |   |
| chr11.0125226340 | 0.78  | 4.50E-02 | PKNOX2                      |   |   |
| chr19.0005142189 | -0.80 | 4.50E-02 | KDM4B                       |   |   |
| chr17.0040253756 | 1.14  | 4.52E-02 | DHX58                       |   |   |
| chr13.0031926541 | -1.14 | 4.53E-02 |                             |   |   |
| chr7.0137873425  | 0.67  | 4.55E-02 |                             |   |   |
| chr20.0009574232 | -0.91 | 4.58E-02 | PAK7                        |   |   |
| chr11.0064061447 | 0.69  | 4.58E-02 | KCNK4, RP11-783K16.10       |   |   |
| chr12.0057404060 | 0.83  | 4.58E-02 | TAC3                        |   |   |
| chr2.0016179024  | 0.94  | 4.59E-02 | AC010145.4                  |   |   |

|                  |       |          |                      |   |   |
|------------------|-------|----------|----------------------|---|---|
| chr15.0057660329 | 0.97  | 4.62E-02 |                      |   |   |
| chr15.0028821466 | -1.10 | 4.62E-02 | RP11-665A22.1        |   |   |
| chr6.0017105598  | 0.86  | 4.62E-02 | STMND1               |   |   |
| chr10.0104366434 | -0.69 | 4.62E-02 | SUFU                 |   |   |
| chr12.0022379973 | -0.99 | 4.63E-02 | ST8SIA1              |   |   |
| chr22.0039679677 | 0.76  | 4.63E-02 |                      |   |   |
| chr6.0168744278  | -0.73 | 4.65E-02 |                      |   |   |
| chr20.0045382067 | -0.86 | 4.65E-02 |                      |   |   |
| chr12.0133655015 | 0.83  | 4.65E-02 |                      |   |   |
| chr18.0045856283 | -0.83 | 4.65E-02 | ZBTB7C               |   |   |
| chr12.0026672531 | 1.00  | 4.65E-02 | ITPR2                |   |   |
| chr12.0050232608 | 0.94  | 4.66E-02 | BCDIN3D-AS1, BCDIN3D |   |   |
| chr5.0071798672  | -0.89 | 4.66E-02 | ZNF366               |   |   |
| chr2.0238314153  | 0.90  | 4.69E-02 | COL6A3               | X |   |
| chr6.0148174138  | -0.88 | 4.76E-02 | RP11-307P5.1         |   |   |
| chr16.0000331917 | 0.83  | 4.76E-02 | ARHGDIG              |   |   |
| chr14.0070317146 | -1.21 | 4.77E-02 |                      |   |   |
| chr11.0067345684 | -1.16 | 4.77E-02 |                      |   |   |
| chr12.0063894317 | 1.02  | 4.80E-02 |                      |   |   |
| chr21.0044609126 | 0.86  | 4.81E-02 |                      |   |   |
| chr6.0147770007  | 0.62  | 4.82E-02 |                      |   |   |
| chr6.0036011510  | -0.89 | 4.82E-02 | MAPK14               | X |   |
| chr20.0058218260 | 0.93  | 4.86E-02 | PHACTR3              |   |   |
| chr10.0093474401 | -0.65 | 4.86E-02 |                      |   |   |
| chr11.0011584859 | -0.85 | 4.86E-02 | GALNT18              |   | X |
| chr12.0049982264 | -0.90 | 4.86E-02 | PRPF40B, FAM186B     |   |   |
| chr13.0021286449 | -1.10 | 4.86E-02 | IL17D                |   |   |
| chr17.0059573051 | 0.97  | 4.86E-02 |                      |   |   |
| chr11.0031811526 | 0.64  | 4.87E-02 | PAX6                 |   |   |
| chr3.0010978002  | 0.74  | 4.87E-02 | SLC6A11              |   | X |
| chr18.0013924980 | -1.46 | 4.88E-02 |                      |   |   |
| chr12.0054366343 | 0.87  | 4.92E-02 | HOTAIR               |   |   |
| chr18.0043684277 | 0.99  | 4.94E-02 | ATP5A1               |   |   |
| chr2.0014931410  | 0.65  | 4.95E-02 |                      |   |   |
| chr18.0047812935 | -0.87 | 4.95E-02 | CXXC1                |   |   |
| chr3.0049314217  | -1.55 | 4.99E-02 | C3orf62              |   |   |
| chr3.0076990952  | -0.93 | 4.99E-02 | ROBO2                |   | X |
| chr15.0092571606 | 0.83  | 5.00E-02 | SLCO3A1              |   |   |

**Table S3.** Significant CpGs in MTs. LogFC = log<sub>2</sub> fold change; positive logFC = hypermethylated in CP; negative logFC = hypomethylated in CP; blank values for gene = intergenic regions. X's indicate sites within muscle genes or annotated enhancers.

| CpG site         | LogFC | FDR corrected p-value | Gene                                  | Muscle Gene | Enhancer Region |
|------------------|-------|-----------------------|---------------------------------------|-------------|-----------------|
| chr20.0054764055 | -1.77 | 7.99E-19              |                                       |             |                 |
| chr22.0041683914 | -1.64 | 9.61E-18              |                                       |             |                 |
| chr12.0128167651 | 1.57  | 7.53E-14              |                                       |             |                 |
| chr15.0022731573 | -3.11 | 8.31E-13              |                                       |             |                 |
| chr11.0093971657 | 1.48  | 3.24E-12              | RP11-680H20.2                         |             |                 |
| chr3.0051997994  | 2.37  | 3.48E-12              | PCBP4, RP11-155D18.14, RP11-155D18.12 |             |                 |
| chr20.0022553062 | -2.00 | 8.86E-12              | LINC00261                             |             |                 |
| chr20.0060375363 | -1.50 | 8.88E-12              | CDH4                                  |             |                 |
| chr12.0001742005 | -1.59 | 6.83E-11              | WNT5B                                 |             |                 |
| chr12.0114885652 | -2.71 | 1.19E-10              |                                       |             |                 |
| chr19.0048673525 | 2.17  | 8.48E-10              | LIG1                                  |             |                 |
| chr16.0058069921 | 1.35  | 2.56E-09              | MMP15                                 |             |                 |
| chr18.0071801714 | 1.29  | 5.18E-09              | FBXO15                                |             |                 |
| chr15.0092982723 | 1.73  | 7.98E-09              | ST8SIA2                               |             |                 |
| chr16.0002176197 | 2.29  | 3.62E-08              | PKD1                                  |             |                 |
| chr14.0019735451 | -2.07 | 3.75E-08              |                                       |             |                 |
| chr3.0073186712  | 1.17  | 6.27E-08              |                                       |             |                 |
| chr11.0017593831 | -1.48 | 8.49E-08              | OTOG                                  |             |                 |
| chr14.0035358595 | 1.17  | 1.09E-07              |                                       |             |                 |
| chr4.0101719592  | -1.15 | 1.50E-07              | EMCN                                  |             |                 |
| chr12.0031371137 | 1.21  | 2.28E-07              |                                       |             | X               |
| chr13.0089105339 | 1.17  | 2.85E-07              |                                       |             |                 |
| chr14.0101270192 | -2.14 | 4.57E-07              | MEG3                                  |             |                 |
| chr10.0047273588 | -1.21 | 4.65E-07              |                                       |             |                 |
| chr13.0113650227 | -1.14 | 5.29E-07              | MCF2L                                 |             |                 |
| chr19.0019007351 | 1.65  | 6.17E-07              | CERS1                                 |             |                 |
| chr18.0043923940 | -1.73 | 6.64E-07              | RNF165                                |             |                 |
| chr12.0119584195 | 1.10  | 8.08E-07              | SRRM4                                 |             |                 |
| chr2.0056193463  | 1.55  | 1.07E-06              | RP11-481J13.1, AC011306.2             |             |                 |
| chr12.0002513357 | 1.11  | 1.13E-06              | CACNA1C                               | X           |                 |
| chr13.0028891055 | 1.13  | 1.21E-06              | FLT1                                  |             |                 |
| chr22.0046279322 | 1.50  | 1.23E-06              | WI2-85898F10.1                        |             |                 |
| chr11.0123045794 | -1.54 | 1.82E-06              | CLMP                                  |             |                 |
| chr5.0145724640  | 1.54  | 2.32E-06              | CTC-359M8.1                           |             |                 |
| chr9.0043084487  | 1.71  | 2.70E-06              | ANKRD20A3                             |             |                 |

|                  |       |          |                                     |   |   |
|------------------|-------|----------|-------------------------------------|---|---|
| chr15.0067989241 | 1.16  | 3.44E-06 | MAP2K5                              |   |   |
| chr9.0000109396  | -1.44 | 4.07E-06 |                                     |   |   |
| chr15.0069824154 | 1.55  | 4.20E-06 | RP11-279F6.1                        |   |   |
| chr12.0116068191 | -1.58 | 4.42E-06 | RP11-1028N23.4                      |   |   |
| chr12.0133301799 | -1.93 | 4.50E-06 |                                     |   |   |
| chr18.0011747918 | -1.85 | 4.52E-06 | GNAL                                |   |   |
| chr16.0073089847 | -1.42 | 4.72E-06 | ZFHX3                               | X |   |
| chr16.0000680326 | -1.17 | 4.84E-06 | WFIKK1                              |   |   |
| chr17.0075149309 | 1.38  | 5.78E-06 | SEC14L1                             |   |   |
| chr11.0067044849 | 1.99  | 6.16E-06 | ADRBK1                              |   |   |
| chr14.0034393486 | 1.09  | 6.26E-06 | EGLN3                               |   |   |
| chr12.0001609391 | 1.45  | 6.57E-06 |                                     |   |   |
| chr22.0040113559 | 1.04  | 6.88E-06 |                                     |   | X |
| chr14.0104820848 | 2.33  | 7.61E-06 |                                     |   |   |
| chr20.0007787573 | -1.03 | 7.76E-06 |                                     |   |   |
| chr15.0090964193 | 1.56  | 7.81E-06 | IQGAP1                              |   |   |
| chr20.0048793087 | -1.09 | 7.84E-06 | RP11-112L6.4                        |   |   |
| chr12.0011513104 | -1.02 | 8.25E-06 | PRB1                                |   |   |
| chr11.0116578644 | 1.50  | 8.36E-06 |                                     |   |   |
| chr17.0078426681 | 1.30  | 8.42E-06 |                                     |   |   |
| chr2.0067681880  | -1.03 | 8.71E-06 |                                     |   |   |
| chr5.0172124187  | 1.46  | 8.81E-06 | CTB-79E8.2                          |   |   |
| chr7.0016768868  | -1.03 | 8.88E-06 |                                     |   |   |
| chr20.0019221684 | 1.06  | 8.90E-06 | SLC24A3                             |   |   |
| chr20.0019447811 | 1.06  | 8.91E-06 | SLC24A3                             |   |   |
| chr20.0035217888 | 0.99  | 8.95E-06 | RP5-977B1.11, TGIF2, TGIF2-C20orf24 |   |   |
| chr2.0029850455  | 1.32  | 9.56E-06 | ALK                                 |   |   |
| chr18.0077209053 | -1.56 | 9.74E-06 | NFATC1                              |   |   |
| chr3.0119863345  | 1.48  | 1.03E-05 |                                     |   |   |
| chr20.0060893697 | -1.03 | 1.04E-05 | LAMA5                               | X |   |
| chr11.0126004170 | 1.28  | 1.08E-05 |                                     |   |   |
| chr13.0113705362 | -1.58 | 1.13E-05 |                                     |   |   |
| chr2.0239051141  | 1.69  | 1.24E-05 | KLHL30                              |   |   |
| chr22.0044736662 | 1.52  | 1.45E-05 |                                     |   |   |
| chr3.0017180369  | 1.02  | 1.96E-05 |                                     |   |   |
| chr14.0105643016 | 1.49  | 2.15E-05 | RP11-44N21.4, NUDT14                |   |   |
| chr22.0040899482 | -1.03 | 2.22E-05 | MKL1                                |   |   |
| chr13.0093896533 | 2.41  | 2.50E-05 | GPC6                                |   |   |
| chr14.0104781790 | 1.55  | 2.51E-05 |                                     |   |   |
| chr14.0065204158 | 1.00  | 2.53E-05 | PLEKHG3                             |   |   |
| chr3.0122711856  | 1.43  | 2.94E-05 | SEMA5B                              |   |   |

|                  |       |          |                         |   |   |
|------------------|-------|----------|-------------------------|---|---|
| chr18.0044547036 | 1.72  | 2.97E-05 | KATNAL2                 |   |   |
| chr16.0066879958 | 1.00  | 3.34E-05 | NAE1, RP11-61A14.1, CA7 |   | X |
| chr16.0079468883 | 1.28  | 3.34E-05 |                         |   |   |
| chr20.0035872503 | -1.23 | 3.37E-05 |                         |   |   |
| chr11.0129750009 | -1.00 | 3.39E-05 | NFRKB                   |   |   |
| chr12.0016644803 | -1.03 | 3.43E-05 | MGST1                   |   |   |
| chr3.0130802181  | 1.32  | 3.81E-05 | NEK11                   |   |   |
| chr19.0011533307 | 0.96  | 3.82E-05 | CCDC151                 |   |   |
| chr18.0045011716 | 1.41  | 4.02E-05 | CTD-2130013.1           |   |   |
| chr18.0023390824 | 0.99  | 4.44E-05 |                         |   |   |
| chr12.0131689822 | 1.74  | 4.47E-05 | RP11-638F5.1            |   |   |
| chr16.0002004921 | 1.33  | 4.90E-05 | RPL3L                   |   |   |
| chr3.0117631830  | 1.07  | 4.91E-05 | LSAMP, RP11-384F7.2     |   |   |
| chr3.0016939628  | -0.76 | 4.97E-05 | PLCL2                   |   |   |
| chr22.0038022735 | 1.46  | 4.98E-05 | GGA1                    |   |   |
| chr12.0057608666 | 2.24  | 5.16E-05 |                         |   |   |
| chr13.0085360140 | 1.03  | 5.19E-05 | SCARF2                  |   |   |
| chr22.0020779274 | 1.36  | 5.19E-05 |                         |   |   |
| chr12.0129065948 | -1.87 | 5.22E-05 | TMEM132C                |   |   |
| chr12.0010243158 | 1.52  | 5.34E-05 | CLEC1A                  |   |   |
| chr12.0083436417 | 2.14  | 5.88E-05 | TMTC2                   |   |   |
| chr15.0101588506 | 1.04  | 6.02E-05 | LRRK1, RP11-505E24.3    |   |   |
| chr18.0006284010 | 0.98  | 6.44E-05 | L3MBTL4                 |   |   |
| chr14.0021177142 | -1.24 | 6.51E-05 |                         |   |   |
| chr2.0071533997  | 1.62  | 6.62E-05 | ZNF638                  |   | X |
| chr14.0093019588 | 1.53  | 6.67E-05 | RIN3                    |   |   |
| chr4.0095555981  | 0.90  | 7.15E-05 | PDLIM5                  | X |   |
| chr3.0138666240  | -1.23 | 7.17E-05 | C3orf72                 |   |   |
| chr16.0084054247 | -1.12 | 7.23E-05 | SLC38A8                 |   |   |
| chr20.0061411239 | 1.36  | 7.28E-05 |                         |   |   |
| chr2.0035092870  | -1.19 | 7.35E-05 | AC012593.1              |   |   |
| chr15.0098537476 | 1.15  | 7.59E-05 |                         |   |   |
| chr20.0025001878 | -1.34 | 8.18E-05 | ACSS1                   |   |   |
| chr16.0003238806 | 1.52  | 8.36E-05 | AJ003147.9              |   |   |
| chr6.0016145414  | -1.24 | 8.39E-05 | MYLIP                   |   |   |
| chr12.0101447687 | 1.57  | 8.98E-05 | ANO4                    |   |   |
| chr20.0056608905 | 1.00  | 8.98E-05 |                         |   |   |
| chr10.0133837347 | -1.19 | 9.10E-05 |                         |   |   |
| chr14.0045546460 | 0.95  | 9.25E-05 |                         |   |   |
| chr5.0177181499  | -1.23 | 9.62E-05 | FAM153A                 |   |   |
| chr11.0129565594 | 1.68  | 1.09E-04 |                         |   |   |

|                  |       |          |                          |  |   |
|------------------|-------|----------|--------------------------|--|---|
| chr15.0067076049 | -0.95 | 1.13E-04 |                          |  |   |
| chr20.0061921394 | 0.99  | 1.16E-04 |                          |  |   |
| chr14.0069861077 | -0.96 | 1.20E-04 | ERH                      |  |   |
| chr14.0096653669 | -1.43 | 1.20E-04 |                          |  | X |
| chr3.0013245073  | 0.96  | 1.21E-04 |                          |  |   |
| chr19.0002863955 | 1.17  | 1.22E-04 |                          |  |   |
| chr12.0103344694 | -1.28 | 1.22E-04 | PAH                      |  |   |
| chr20.0055369320 | -1.68 | 1.23E-04 |                          |  |   |
| chr9.0008638390  | 0.93  | 1.39E-04 | PTPRD                    |  |   |
| chr6.0159600100  | 1.37  | 1.40E-04 | FNDC1                    |  | X |
| chr13.0044362688 | 1.04  | 1.42E-04 |                          |  |   |
| chr9.0026632294  | 0.92  | 1.45E-04 |                          |  |   |
| chr19.0007038916 | -1.20 | 1.51E-04 | MBD3L4                   |  |   |
| chr17.0036292033 | 2.25  | 1.66E-04 | TBC1D3F                  |  |   |
| chr15.0069452943 | 1.57  | 1.66E-04 | GLCE                     |  |   |
| chr17.0073069667 | 0.92  | 1.66E-04 |                          |  |   |
| chr5.0177219938  | -0.97 | 1.75E-04 | RP11-1026M7.2            |  |   |
| chr19.0008750022 | 1.20  | 1.82E-04 |                          |  |   |
| chr14.0080449863 | -1.74 | 1.82E-04 |                          |  | X |
| chr2.0023747265  | 1.15  | 1.82E-04 | KLHL29                   |  |   |
| chr14.0021316565 | -1.56 | 1.82E-04 |                          |  |   |
| chr17.0018941025 | -1.96 | 1.85E-04 | GRAP                     |  |   |
| chr14.0053155967 | -0.96 | 1.86E-04 | ERO1L                    |  |   |
| chr5.0164550214  | -1.19 | 2.14E-04 | CTC-340A15.2             |  |   |
| chr5.0122422526  | 1.39  | 2.21E-04 |                          |  |   |
| chr17.0038475164 | -1.29 | 2.26E-04 | RARA                     |  |   |
| chr18.0029197908 | 1.13  | 2.30E-04 |                          |  |   |
| chr14.0104190006 | -1.75 | 2.35E-04 | ZFYVE21                  |  |   |
| chr12.0130645000 | -1.81 | 2.38E-04 | FZD10-AS1                |  |   |
| chr20.0059927068 | 0.96  | 2.48E-04 |                          |  |   |
| chr5.0106482812  | -1.22 | 2.57E-04 |                          |  |   |
| chr6.0164766175  | -1.55 | 2.58E-04 |                          |  |   |
| chr14.0101909600 | 1.07  | 2.75E-04 | RP11-168L7.3             |  | X |
| chr18.0076123813 | -1.22 | 2.79E-04 |                          |  |   |
| chr17.0079292270 | 0.91  | 2.87E-04 | TMEM105                  |  |   |
| chr14.0104465222 | 0.88  | 2.88E-04 | TDRD9                    |  |   |
| chr19.0016830739 | 1.11  | 3.11E-04 |                          |  |   |
| chr15.0069516868 | 1.65  | 3.22E-04 |                          |  |   |
| chr17.0074566299 | 1.14  | 3.38E-04 | ST6GALNAC2, RP11-666A8.9 |  |   |
| chr12.0006104973 | -1.64 | 3.48E-04 | VWF                      |  |   |
| chr3.0189596966  | -1.29 | 3.62E-04 | TP63                     |  |   |

|                  |       |          |                              |   |   |
|------------------|-------|----------|------------------------------|---|---|
| chr2.0218771815  | -1.20 | 3.62E-04 | TNS1                         |   |   |
| chr15.0058213431 | 1.26  | 3.68E-04 |                              |   | X |
| chr15.0057921004 | 0.93  | 3.75E-04 | GCOM1, MYZAP, POLR2M         |   |   |
| chr14.0069738172 | -1.25 | 3.87E-04 | GALNT16                      |   | X |
| chr15.0045573050 | -1.11 | 3.95E-04 |                              |   |   |
| chr19.0004596412 | 1.20  | 4.13E-04 |                              |   |   |
| chr17.0053343752 | 1.76  | 4.27E-04 | HLF                          | X |   |
| chr2.0238831642  | 1.32  | 4.33E-04 |                              |   |   |
| chr5.0166472226  | -1.16 | 4.40E-04 |                              |   |   |
| chr12.0085129789 | 1.31  | 4.59E-04 |                              |   |   |
| chr9.0035610018  | 0.86  | 4.59E-04 | TESK1, CD72                  |   |   |
| chr17.0002701265 | 1.19  | 4.64E-04 | RAP1GAP2                     |   |   |
| chr15.0055457141 | 1.19  | 4.75E-04 |                              |   |   |
| chr5.0131564700  | -1.05 | 4.76E-04 | P4HA2                        |   |   |
| chr2.0107178887  | 1.28  | 4.77E-04 |                              |   |   |
| chr12.0101846506 | 1.04  | 4.81E-04 |                              |   |   |
| chr9.0120247630  | -1.36 | 4.81E-04 |                              |   | X |
| chr13.0027424109 | 1.56  | 4.94E-04 |                              |   | X |
| chr6.0151563368  | -0.67 | 5.08E-04 | AKAP12                       |   |   |
| chr22.0022129567 | 1.57  | 5.35E-04 | MAPK1                        |   |   |
| chr2.0060196436  | 0.91  | 5.36E-04 | RP11-444A22.1                |   |   |
| chr2.0129148635  | 0.93  | 5.37E-04 |                              |   |   |
| chr20.0048993491 | -0.65 | 5.39E-04 |                              |   |   |
| chr14.0061281110 | 0.88  | 5.55E-04 | MNAT1                        |   |   |
| chr3.0149299399  | 1.18  | 5.63E-04 | WWTR1                        |   |   |
| chr2.0235215325  | -1.08 | 5.88E-04 |                              |   |   |
| chr9.0044359093  | -1.56 | 5.99E-04 |                              |   |   |
| chr13.0042220397 | -1.10 | 6.05E-04 | VWA8                         |   |   |
| chr4.0174264841  | 0.88  | 6.07E-04 |                              |   |   |
| chr12.0114238657 | 0.89  | 6.08E-04 |                              |   |   |
| chr19.0039524206 | -1.08 | 6.25E-04 |                              |   |   |
| chr10.0010604528 | 0.99  | 6.32E-04 |                              |   |   |
| chr15.0068639973 | 1.53  | 6.66E-04 | ITGA11                       | X |   |
| chr19.0045735345 | -1.09 | 6.74E-04 | MARK4, EXOC3L2               |   |   |
| chr2.0113399982  | 0.98  | 6.75E-04 | AC079922.3                   |   |   |
| chr16.0002478353 | -1.36 | 7.18E-04 |                              |   |   |
| chr17.0077893455 | 1.55  | 7.25E-04 | RP11-353N14.5, RP11-353N14.4 |   |   |
| chr17.0019045779 | -1.56 | 7.25E-04 | GRAPL, CTC-457L16.2          |   |   |
| chr13.0052817715 | -1.01 | 7.59E-04 | RP11-248G5.8, TPTE2P2        |   |   |
| chr20.0059339955 | 1.00  | 7.92E-04 |                              |   |   |
| chr11.0046135102 | 0.86  | 7.96E-04 | PHF21A                       |   |   |

|                  |       |          |                 |   |   |
|------------------|-------|----------|-----------------|---|---|
| chr20.0060885977 | -0.90 | 7.98E-04 |                 |   |   |
| chr10.0096151033 | -0.84 | 7.99E-04 |                 |   |   |
| chr15.0078689511 | 1.84  | 8.13E-04 |                 |   | X |
| chr3.0053784559  | 1.14  | 8.13E-04 | CACNA1D         | X |   |
| chr15.0043244495 | -0.88 | 8.15E-04 | UBR1            |   |   |
| chr22.0029463592 | -1.23 | 8.18E-04 |                 |   |   |
| chr13.0102572261 | -1.39 | 8.21E-04 | FGF14           |   |   |
| chr22.0042875005 | 1.41  | 8.23E-04 |                 |   | X |
| chr16.0088038262 | 1.25  | 8.24E-04 | BANP            |   |   |
| chr14.0104977792 | 1.66  | 8.42E-04 | TMEM179         |   |   |
| chr19.0010249278 | 1.07  | 8.45E-04 | DNMT1           |   |   |
| chr21.0044484874 | 1.12  | 8.48E-04 | CBS             |   |   |
| chr20.0060501154 | 1.87  | 8.50E-04 |                 |   |   |
| chr17.0026101385 | 0.88  | 8.55E-04 | NOS2            |   |   |
| chr16.0016763207 | -1.39 | 8.57E-04 |                 |   |   |
| chr17.0030126050 | -1.04 | 8.63E-04 |                 |   |   |
| chr12.0052817612 | 1.90  | 8.70E-04 | RP11-1020M18.10 |   |   |
| chr14.0096628985 | 1.05  | 9.38E-04 |                 |   |   |
| chr15.0034647112 | -0.86 | 9.41E-04 | NUTM1           |   |   |
| chr6.0030746896  | 1.34  | 9.42E-04 | HCG20           |   |   |
| chr5.0164483805  | -1.11 | 9.49E-04 |                 |   |   |
| chr15.0098986819 | 1.07  | 9.59E-04 | FAM169B         |   | X |
| chr12.0033043614 | 0.91  | 1.00E-03 | PKP2            | X |   |
| chr10.0105420300 | -1.73 | 1.03E-03 | SH3PXD2A        |   |   |
| chr21.0030689317 | -0.86 | 1.05E-03 | BACH1           |   |   |
| chr14.0043795919 | -1.01 | 1.06E-03 |                 |   |   |
| chr11.0068950670 | 1.04  | 1.07E-03 |                 |   |   |
| chr6.0117187287  | -0.97 | 1.08E-03 |                 |   |   |
| chr14.0093530974 | 1.55  | 1.12E-03 | ITPK1           |   |   |
| chr14.0105065084 | 2.21  | 1.12E-03 |                 |   | X |
| chr14.0100040905 | -1.28 | 1.16E-03 | CCDC85C         |   |   |
| chr14.0055966140 | 1.12  | 1.17E-03 | KTN1-AS1        |   | X |
| chr17.0019046425 | -1.38 | 1.19E-03 |                 |   |   |
| chr22.0050332646 | -1.35 | 1.20E-03 |                 |   |   |
| chr14.0075517195 | 1.29  | 1.21E-03 | MLH3            |   |   |
| chr15.0088659150 | 1.60  | 1.21E-03 | NTRK3           |   | X |
| chr2.0046561399  | -1.02 | 1.22E-03 | EPAS1           |   |   |
| chr20.0037906145 | 1.06  | 1.23E-03 |                 |   |   |
| chr18.0072843785 | -1.61 | 1.26E-03 |                 |   |   |
| chr12.0052981404 | 1.00  | 1.26E-03 | KRT72           |   |   |
| chr22.0030084328 | 0.88  | 1.28E-03 | NF2             |   |   |



|                  |       |          |                   |   |   |
|------------------|-------|----------|-------------------|---|---|
| chr13.0099764013 | 0.87  | 1.28E-03 |                   |   |   |
| chr22.0050341737 | -0.96 | 1.31E-03 |                   |   |   |
| chr15.0033445994 | 0.87  | 1.32E-03 | FMN1              |   |   |
| chr11.0042088046 | 0.89  | 1.33E-03 | RP11-148I19.1     |   |   |
| chr12.0013354616 | 1.14  | 1.34E-03 | EMP1              |   |   |
| chr17.0070499160 | 1.06  | 1.34E-03 | LINC00511         |   |   |
| chr15.0080573863 | 0.88  | 1.35E-03 | LINC00927         |   |   |
| chr10.0104354945 | -0.83 | 1.35E-03 | SUFU              |   |   |
| chr9.0018605667  | -1.06 | 1.36E-03 | ADAMTSL1          |   |   |
| chr14.0105040488 | 1.64  | 1.36E-03 |                   |   |   |
| chr15.0101482307 | -0.86 | 1.36E-03 |                   |   |   |
| chr20.0060272050 | 0.98  | 1.36E-03 |                   |   |   |
| chr10.0004224715 | -1.04 | 1.36E-03 |                   |   |   |
| chr6.0001385426  | 1.02  | 1.37E-03 |                   |   |   |
| chr12.0010242982 | 1.25  | 1.38E-03 |                   |   |   |
| chr11.0070369651 | 1.18  | 1.39E-03 | SHANK2            |   |   |
| chr13.0077121220 | 1.42  | 1.40E-03 |                   |   |   |
| chr12.0046149812 | -0.98 | 1.44E-03 | ARID2             |   |   |
| chr18.0046461592 | 1.01  | 1.44E-03 | SMAD7             | X |   |
| chr13.0028302652 | 1.74  | 1.44E-03 |                   |   | X |
| chr13.0047916427 | -0.93 | 1.44E-03 |                   |   |   |
| chr22.0038010164 | 1.17  | 1.45E-03 |                   |   |   |
| chr2.0237117273  | -1.03 | 1.45E-03 | AC079135.1, ASB18 |   |   |
| chr18.0038139510 | 1.29  | 1.45E-03 |                   |   |   |
| chr3.0060920593  | 0.96  | 1.50E-03 | FHIT              |   |   |
| chr17.0065622780 | -0.86 | 1.53E-03 | PITPNC1           |   |   |
| chr8.0042999184  | -0.83 | 1.55E-03 | HGSNAT            |   |   |
| chr14.0021179750 | -1.08 | 1.56E-03 |                   |   |   |
| chr9.0116266123  | 0.90  | 1.56E-03 | RGS3              |   |   |
| chr5.0137549862  | 1.24  | 1.63E-03 |                   |   |   |
| chr12.0122395466 | -0.85 | 1.63E-03 | WDR66             |   |   |
| chr12.0120463149 | -0.88 | 1.63E-03 | CCDC64            |   |   |
| chr18.0071529044 | 1.14  | 1.64E-03 |                   |   |   |
| chr13.0045890247 | 1.04  | 1.70E-03 |                   |   |   |
| chr9.0138653925  | 0.83  | 1.84E-03 | KCNT1             |   |   |
| chr16.0000555577 | -0.82 | 1.91E-03 | RAB11FIP3         |   |   |
| chr13.0113678380 | -1.34 | 1.92E-03 |                   |   |   |
| chr12.0063544384 | -1.06 | 1.94E-03 | AVPR1A            |   |   |
| chr3.0077077670  | 0.84  | 1.95E-03 | ROBO2             |   |   |
| chr22.0020244288 | -1.28 | 1.97E-03 | RTN4R             |   |   |
| chr13.0033220266 | -1.31 | 1.97E-03 | PDS5B             |   |   |

|                  |       |          |                                      |  |   |
|------------------|-------|----------|--------------------------------------|--|---|
| chr6.0021679242  | 1.01  | 2.00E-03 | CASC15                               |  |   |
| chr16.0077912976 | -1.28 | 2.00E-03 | VAT1L                                |  |   |
| chr20.0048859896 | 1.74  | 2.05E-03 |                                      |  |   |
| chr17.0008238137 | -1.14 | 2.05E-03 |                                      |  |   |
| chr12.0053189775 | 1.06  | 2.05E-03 | KRT3                                 |  |   |
| chr14.0096729260 | 1.15  | 2.08E-03 | RP11-404P21.8, BDKRB1, RP11-404P21.3 |  |   |
| chr2.0047454097  | -0.94 | 2.22E-03 | AC073283.4, AC106869.2               |  |   |
| chr3.0111469507  | -1.01 | 2.23E-03 | PLCXD2, PHLDB2                       |  |   |
| chr12.0066791524 | 1.02  | 2.23E-03 | GRIP1                                |  |   |
| chr18.0020972062 | -0.89 | 2.25E-03 | TMEM241                              |  |   |
| chr13.0074262821 | -0.94 | 2.25E-03 | KLF12                                |  |   |
| chr15.0088174247 | 1.02  | 2.26E-03 | RP11-648K4.2                         |  |   |
| chr22.0049403377 | 1.35  | 2.27E-03 |                                      |  |   |
| chr6.0008948266  | 1.24  | 2.27E-03 |                                      |  |   |
| chr5.0159719484  | 0.82  | 2.28E-03 | CCNJL                                |  |   |
| chr14.0075019216 | -1.30 | 2.28E-03 | LTBP2, CTD-2207P18.1                 |  |   |
| chr8.0001828441  | 1.25  | 2.29E-03 | ARHGEF10                             |  |   |
| chr12.0106248941 | 1.04  | 2.30E-03 |                                      |  |   |
| chr3.0167620956  | -0.90 | 2.31E-03 | RP11-298O21.5                        |  |   |
| chr10.0126136854 | 1.31  | 2.32E-03 | NKX1-2, RP13-238F13.3                |  |   |
| chr19.0029574847 | -1.29 | 2.35E-03 |                                      |  |   |
| chr22.0019946864 | 1.15  | 2.38E-03 | COMT                                 |  |   |
| chr2.0111241804  | 1.04  | 2.44E-03 |                                      |  |   |
| chr11.0001418756 | 1.15  | 2.51E-03 | BRSK2                                |  |   |
| chr17.0031110221 | -1.32 | 2.51E-03 | MYO1D                                |  |   |
| chr16.0001339089 | 1.38  | 2.66E-03 |                                      |  |   |
| chr20.0036515329 | 1.07  | 2.67E-03 |                                      |  | X |
| chr14.0050108699 | 1.49  | 2.69E-03 |                                      |  |   |
| chr16.0083715823 | 1.18  | 2.80E-03 | CDH13                                |  | X |
| chr14.0085404000 | -1.38 | 2.81E-03 |                                      |  |   |
| chr15.0101984558 | 1.12  | 2.82E-03 | PCSK6                                |  |   |
| chr11.0062211039 | 1.01  | 2.84E-03 | AHNAK                                |  |   |
| chr10.0068984115 | 0.79  | 2.85E-03 | CTNNA3                               |  |   |
| chr15.0029644298 | 0.97  | 2.85E-03 | FAM189A1                             |  |   |
| chr14.0094578378 | 1.16  | 2.85E-03 | IFI27                                |  |   |
| chr6.0044243576  | 1.12  | 2.86E-03 | TMEM151B, RP11-444E17.6              |  |   |
| chr20.0052825772 | -1.31 | 2.86E-03 | PFDN4                                |  |   |
| chr17.0000112167 | 0.83  | 2.86E-03 | RPH3AL                               |  |   |
| chr17.0026875323 | 1.24  | 2.86E-03 | RP11-192H23.4, UNC119                |  |   |
| chr3.0016419520  | 1.28  | 2.88E-03 | RFTN1                                |  |   |
| chr11.0065261151 | 1.54  | 2.90E-03 |                                      |  |   |

|                  |       |          |                       |   |   |
|------------------|-------|----------|-----------------------|---|---|
| chr22.0033976935 | 0.98  | 2.91E-03 | LARGE1                | X |   |
| chr22.0031890427 | -1.19 | 2.92E-03 | DRG1, EIF4ENIF1, SFI1 |   |   |
| chr5.0003819923  | 0.82  | 2.94E-03 |                       |   |   |
| chr22.0029704946 | 1.44  | 2.95E-03 | GAS2L1                |   |   |
| chr18.0009870097 | -1.48 | 2.95E-03 |                       |   |   |
| chr18.0075321554 | 1.22  | 2.95E-03 |                       |   |   |
| chr12.0113977822 | 0.87  | 2.96E-03 |                       |   |   |
| chr2.0239196855  | -1.12 | 2.96E-03 | PER2                  |   |   |
| chr22.0046472984 | -1.35 | 2.96E-03 | FLJ27365              |   |   |
| chr12.0123780584 | -0.81 | 2.97E-03 | SBNO1                 |   |   |
| chr12.0005898164 | 1.03  | 2.98E-03 | ANO2                  |   |   |
| chr2.0086148506  | 1.07  | 2.98E-03 |                       |   |   |
| chr5.0087955859  | -1.35 | 3.03E-03 | LINC00461             |   |   |
| chr14.0089771498 | 1.60  | 3.17E-03 | FOXN3                 |   |   |
| chr22.0033739403 | 0.82  | 3.17E-03 |                       |   |   |
| chr18.0047230566 | -1.30 | 3.20E-03 |                       |   | X |
| chr5.0092767677  | -0.87 | 3.21E-03 | NR2F1-AS1             |   |   |
| chr3.0123171493  | -0.89 | 3.27E-03 |                       |   |   |
| chr18.0011426911 | -1.01 | 3.28E-03 |                       |   |   |
| chr5.0176220557  | 1.23  | 3.29E-03 |                       |   | X |
| chr2.0182549408  | -1.34 | 3.30E-03 | AC013733.3            |   |   |
| chr11.0122674083 | 1.16  | 3.31E-03 | UBASH3B               |   |   |
| chr6.0154640863  | 1.34  | 3.35E-03 | IPCEF1                |   |   |
| chr3.0045798106  | 0.81  | 3.38E-03 | SLC6A20               |   |   |
| chr12.0131588481 | 1.10  | 3.43E-03 | GPR133                |   |   |
| chr12.0057602992 | 1.61  | 3.48E-03 | LRP1                  |   |   |
| chr2.0020252403  | -1.22 | 3.48E-03 | RP11-644K8.1          |   |   |
| chr3.0054664460  | 0.95  | 3.53E-03 | CACNA2D3              |   |   |
| chr16.0031091597 | -0.81 | 3.53E-03 | ZNF646                |   |   |
| chr2.0114025250  | 0.90  | 3.59E-03 | PAX8, PAX8-AS1        |   |   |
| chr19.0009956949 | -0.82 | 3.62E-03 | PIN1                  |   |   |
| chr13.0036668831 | 1.14  | 3.63E-03 | DCLK1                 |   |   |
| chr20.0015883372 | 0.83  | 3.63E-03 | MACROD2               |   |   |
| chr12.0081306216 | 0.93  | 3.64E-03 | LIN7A                 |   |   |
| chr13.0020646254 | 0.93  | 3.64E-03 | ZMYM2, KRR1P1         |   |   |
| chr3.0160006045  | 0.95  | 3.65E-03 | RP11-432B6.3, IFT80   |   |   |
| chr11.0002408146 | 1.41  | 3.65E-03 | CD81                  |   |   |
| chr17.0043201589 | 1.33  | 3.66E-03 | PLCD3                 |   |   |
| chr18.0011979862 | -0.85 | 3.71E-03 |                       |   |   |
| chr17.0047518498 | 0.87  | 3.73E-03 | RP11-81K2.1           |   |   |
| chr19.0046730089 | 1.06  | 3.77E-03 |                       |   | X |

|                  |       |          |                                 |   |   |
|------------------|-------|----------|---------------------------------|---|---|
| chr16.0087893023 | -1.32 | 3.79E-03 | SLC7A5                          |   |   |
| chr11.0000766885 | -1.25 | 3.79E-03 |                                 |   | X |
| chr12.0117176320 | 1.99  | 3.83E-03 | RNFT2                           |   |   |
| chr15.0057680681 | -1.25 | 3.87E-03 | CGNL1                           |   |   |
| chr15.0081187412 | 0.97  | 3.92E-03 | KIAA1199                        |   |   |
| chr11.0047295306 | 0.95  | 3.98E-03 | MADD                            |   |   |
| chr14.0038781301 | 1.00  | 3.99E-03 |                                 |   |   |
| chr2.0221113349  | 0.84  | 4.07E-03 | AC114765.1                      |   |   |
| chr16.0007479261 | -1.05 | 4.11E-03 | RBFOX1                          |   |   |
| chr11.0017601401 | -0.95 | 4.14E-03 |                                 |   |   |
| chr12.0039057639 | 0.92  | 4.16E-03 | CPNE8                           |   |   |
| chr14.0073050565 | 1.25  | 4.17E-03 | RP3-514A23.2                    |   |   |
| chr11.0116705996 | 1.27  | 4.31E-03 |                                 |   |   |
| chr20.0030285535 | -0.97 | 4.36E-03 | BCL2L1, RP11-243J16.7           |   |   |
| chr20.0031275087 | -0.85 | 4.36E-03 |                                 |   |   |
| chr17.0028803808 | -1.24 | 4.38E-03 |                                 |   |   |
| chr11.0002800586 | 1.27  | 4.39E-03 | KCNQ1                           | X |   |
| chr20.0031490465 | -1.45 | 4.40E-03 | EFCAB8                          |   | X |
| chr11.0070397632 | 1.18  | 4.40E-03 |                                 |   | X |
| chr2.0064955687  | 0.78  | 4.41E-03 | SERTAD2                         |   |   |
| chr19.0052801607 | -0.93 | 4.41E-03 | ZNF480                          |   |   |
| chr22.0033791071 | 0.84  | 4.42E-03 |                                 |   |   |
| chr12.0105913687 | 1.02  | 4.48E-03 |                                 |   |   |
| chr19.0041126191 | -0.92 | 4.48E-03 | LTBP4                           |   |   |
| chr11.0032197363 | 0.80  | 4.49E-03 | RP1-65P5.1                      |   |   |
| chr15.0088159831 | 0.98  | 4.49E-03 |                                 |   |   |
| chr16.0070746421 | -0.92 | 4.50E-03 | VAC14                           |   |   |
| chr10.0017068488 | 0.79  | 4.51E-03 | CUBN                            |   |   |
| chr18.0053091201 | -1.11 | 4.53E-03 | TCF4                            |   |   |
| chr17.0079501119 | 1.48  | 4.53E-03 | FSCN2                           |   | X |
| chr17.0076513353 | -0.80 | 4.54E-03 | DNAH17                          |   |   |
| chr20.0057966327 | -1.33 | 4.56E-03 |                                 |   |   |
| chr12.0104187430 | 0.94  | 4.68E-03 | NT5DC3                          |   |   |
| chr22.0018433398 | -1.70 | 4.71E-03 | MICAL3                          |   |   |
| chr5.0011535023  | 1.19  | 4.71E-03 | CTNND2                          |   |   |
| chr9.0000947870  | 0.83  | 4.71E-03 | DMRT1                           |   |   |
| chr6.0007765009  | 0.83  | 4.72E-03 | BMP6                            |   |   |
| chr13.0115035743 | -0.80 | 4.72E-03 | CDC16                           |   |   |
| chr17.0046667531 | 0.93  | 4.73E-03 | HOXB-AS3, HOXB3                 |   |   |
| chr3.0182124231  | -1.15 | 4.74E-03 |                                 |   | X |
| chr15.0083088304 | 0.83  | 4.74E-03 | RPL9P8, UBE2Q2P3, RP11-152F13.8 |   |   |

|                  |       |          |                        |  |   |
|------------------|-------|----------|------------------------|--|---|
| chr15.0031423000 | -1.23 | 4.75E-03 | TRPM1                  |  |   |
| chr5.0174109443  | -0.81 | 4.75E-03 |                        |  |   |
| chr18.0030519743 | -1.02 | 4.76E-03 | CCDC178                |  | X |
| chr12.0066354814 | 0.99  | 4.77E-03 | HMGA2                  |  |   |
| chr20.0043344103 | 1.32  | 4.77E-03 | RP11-445H22.4, WISP2   |  |   |
| chr2.0111791669  | 0.81  | 4.83E-03 | ACOXL                  |  |   |
| chr6.0170373616  | -0.91 | 4.90E-03 |                        |  |   |
| chr14.0077057981 | -1.15 | 4.94E-03 | RP11-187O7.3           |  |   |
| chr2.0185490688  | 0.78  | 4.95E-03 | ZNF804A                |  |   |
| chr16.0062003103 | -1.29 | 4.96E-03 | CDH8                   |  |   |
| chr7.0001278669  | -1.17 | 5.00E-03 |                        |  |   |
| chr5.0111578627  | 0.83  | 5.02E-03 | EPB41L4A, RP11-526F3.1 |  |   |
| chr14.0074764684 | -0.90 | 5.05E-03 | ABCD4                  |  |   |
| chr16.0048419832 | -1.42 | 5.06E-03 | SIAH1                  |  |   |
| chr16.0090008697 | -0.87 | 5.06E-03 |                        |  |   |
| chr6.0001768121  | 1.29  | 5.07E-03 | GMDS                   |  |   |
| chr5.0075360503  | -1.03 | 5.13E-03 |                        |  |   |
| chr12.0132130323 | 2.53  | 5.14E-03 |                        |  | X |
| chr12.0000566229 | 0.92  | 5.14E-03 |                        |  |   |
| chr12.0086359099 | 0.96  | 5.15E-03 |                        |  |   |
| chr6.0011824090  | 0.80  | 5.18E-03 |                        |  |   |
| chr3.0005182629  | -0.87 | 5.19E-03 | ARL8B                  |  |   |
| chr16.0071043770 | -1.00 | 5.22E-03 | HYDIN                  |  |   |
| chr14.0099456733 | 0.82  | 5.23E-03 |                        |  |   |
| chr14.0105668565 | -1.17 | 5.23E-03 |                        |  |   |
| chr6.0075912800  | 1.03  | 5.24E-03 | COL12A1                |  |   |
| chr15.0061121482 | 0.96  | 5.33E-03 | RORA                   |  |   |
| chr9.0084208113  | 0.92  | 5.35E-03 | TLE1                   |  |   |
| chr15.0051977900 | 0.84  | 5.38E-03 | SCG3                   |  |   |
| chr6.0004100037  | 0.92  | 5.38E-03 | C6orf201               |  |   |
| chr15.0082092159 | 1.04  | 5.39E-03 | RP11-499F3.2           |  |   |
| chr15.0051280672 | -0.87 | 5.40E-03 | AP4E1                  |  |   |
| chr15.0043969272 | 0.87  | 5.50E-03 | STRC, AC011330.5       |  |   |
| chr14.0105285074 | 0.99  | 5.50E-03 |                        |  |   |
| chr15.0071044501 | 0.99  | 5.53E-03 | UACA, RP11-138H8.2     |  |   |
| chr12.0001241667 | -0.57 | 5.65E-03 | ERC1                   |  |   |
| chr14.0050108792 | 1.35  | 5.68E-03 |                        |  |   |
| chr13.0109856377 | -1.52 | 5.71E-03 | MYO16                  |  | X |
| chr12.0132249669 | 0.81  | 5.73E-03 | SFSWAP                 |  |   |
| chr3.0109036950  | 0.90  | 5.73E-03 |                        |  |   |
| chr15.0052549111 | 1.07  | 5.80E-03 | MYO5C                  |  |   |

|                  |       |          |                       |  |   |
|------------------|-------|----------|-----------------------|--|---|
| chr9.0000286627  | 0.89  | 5.80E-03 | DOCK8                 |  |   |
| chr22.0038696824 | -0.77 | 5.80E-03 | CSNK1E                |  |   |
| chr8.0001112153  | 0.74  | 5.82E-03 | CTD-2281E23.2         |  |   |
| chr20.0048363935 | -0.66 | 5.83E-03 |                       |  |   |
| chr5.0011632009  | 0.92  | 5.83E-03 |                       |  |   |
| chr18.0074616984 | 1.08  | 5.83E-03 | ZNF236                |  |   |
| chr2.0015301469  | 0.93  | 5.84E-03 |                       |  |   |
| chr13.0047191668 | -1.34 | 5.86E-03 | LRCH1                 |  |   |
| chr6.0071209322  | 0.89  | 5.87E-03 | FAM135A               |  |   |
| chr3.0127606140  | -1.12 | 5.88E-03 |                       |  |   |
| chr18.0007170034 | -1.66 | 5.89E-03 |                       |  |   |
| chr6.0052861066  | 1.30  | 5.89E-03 |                       |  |   |
| chr15.0078008856 | 1.04  | 5.90E-03 | LINGO1                |  |   |
| chr20.0018295860 | 0.86  | 5.97E-03 | ZNF133                |  |   |
| chr12.0003242436 | 1.10  | 5.99E-03 | TSPAN9                |  |   |
| chr14.0094215266 | 1.00  | 5.99E-03 | PRIMA1                |  |   |
| chr14.0034616607 | -1.10 | 6.00E-03 |                       |  |   |
| chr3.0009152200  | -1.21 | 6.03E-03 | SRGAP3                |  |   |
| chr12.0128790228 | -1.16 | 6.04E-03 |                       |  |   |
| chr5.0149438902  | 0.76  | 6.10E-03 | CSF1R                 |  |   |
| chr12.0023768031 | -0.90 | 6.13E-03 | SOX5                  |  |   |
| chr14.0047624779 | 0.90  | 6.17E-03 | MDGA2                 |  |   |
| chr10.0036627478 | -0.79 | 6.24E-03 |                       |  |   |
| chr18.0024443615 | -1.22 | 6.29E-03 | AQP4-AS1, AQP4        |  |   |
| chr2.0010545065  | -1.17 | 6.35E-03 | HPCAL1                |  |   |
| chr18.0042403544 | 1.01  | 6.36E-03 | SETBP1                |  | X |
| chr17.0011390406 | 1.32  | 6.37E-03 | SHISA6                |  | X |
| chr20.0006327945 | 0.95  | 6.43E-03 |                       |  |   |
| chr12.0126468360 | -1.52 | 6.46E-03 | RP5-916L7.2           |  |   |
| chr11.0092261532 | 1.02  | 6.47E-03 | FAT3                  |  |   |
| chr14.0106416958 | 1.44  | 6.58E-03 |                       |  |   |
| chr11.0002911200 | 0.93  | 6.58E-03 | SLC22A18AS            |  |   |
| chr15.0039617456 | 0.97  | 6.59E-03 | RP11-624L4.1          |  |   |
| chr14.0025947530 | 1.05  | 6.61E-03 |                       |  |   |
| chr2.0038389310  | 1.15  | 6.61E-03 | CYP1B1-AS1            |  |   |
| chr22.0039605885 | 0.86  | 6.63E-03 |                       |  |   |
| chr6.0044242577  | 0.87  | 6.66E-03 |                       |  |   |
| chr12.0000313066 | 1.52  | 6.88E-03 | SLC6A12, RP11-283I3.2 |  |   |
| chr21.0046032860 | 0.97  | 6.91E-03 | TSPEAR, KRTAP10-8     |  |   |
| chr16.0082973314 | 0.79  | 6.93E-03 |                       |  |   |
| chr15.0060047878 | 1.04  | 6.96E-03 |                       |  |   |

|                  |       |          |                              |   |   |
|------------------|-------|----------|------------------------------|---|---|
| chr12.0067447796 | 0.98  | 7.08E-03 | RP11-123O10.4, RP11-123O10.3 |   |   |
| chr12.0052969844 | 0.91  | 7.12E-03 |                              |   |   |
| chr5.0011534641  | 1.05  | 7.25E-03 |                              |   |   |
| chr3.0152680039  | 1.12  | 7.26E-03 |                              |   |   |
| chr20.0045860407 | 0.99  | 7.36E-03 | ZMYND8                       |   |   |
| chr22.0019036590 | -0.94 | 7.37E-03 | DGCR2                        |   |   |
| chr16.0081443989 | 0.78  | 7.37E-03 |                              |   |   |
| chr13.0100228957 | -0.89 | 7.38E-03 |                              |   |   |
| chr18.0018606618 | -0.91 | 7.40E-03 | ROCK1                        | X |   |
| chr12.0053958599 | 0.98  | 7.41E-03 | RP11-793H13.10, ATF7         |   |   |
| chr3.0109858228  | 1.23  | 7.41E-03 |                              |   |   |
| chr2.0242709430  | 1.03  | 7.42E-03 |                              |   |   |
| chr15.0042067504 | 1.56  | 7.45E-03 | MAPKBP1                      |   |   |
| chr12.0098384560 | 0.94  | 7.49E-03 |                              |   |   |
| chr2.0023747257  | 0.84  | 7.50E-03 |                              |   |   |
| chr7.0056844460  | 0.84  | 7.58E-03 |                              |   |   |
| chr9.0042897524  | 1.11  | 7.65E-03 |                              |   |   |
| chr12.0095551716 | -0.89 | 7.77E-03 | FGD6                         |   |   |
| chr6.0051247041  | 0.80  | 7.77E-03 |                              |   |   |
| chr14.0078559726 | 0.96  | 7.81E-03 |                              |   |   |
| chr20.0019488775 | 1.08  | 7.81E-03 |                              |   |   |
| chr20.0019419638 | -1.61 | 7.82E-03 |                              |   |   |
| chr20.0060375820 | -1.58 | 7.85E-03 |                              |   |   |
| chr11.0009068783 | 1.08  | 7.89E-03 | RP11-467K18.2, SCUBE2        |   |   |
| chr18.0047177650 | -0.64 | 7.90E-03 |                              |   | X |
| chr7.0140039833  | 0.72  | 7.94E-03 | SLC37A3                      |   |   |
| chr20.0025513653 | 1.09  | 7.95E-03 | NINL                         |   |   |
| chr5.0071385502  | -0.78 | 8.04E-03 |                              |   |   |
| chr16.0070734806 | 1.35  | 8.06E-03 |                              |   |   |
| chr15.0079070483 | -1.15 | 8.06E-03 | ADAMTS7                      |   |   |
| chr15.0028343785 | -2.11 | 8.07E-03 | OCA2                         |   |   |
| chr3.0023957967  | 2.03  | 8.12E-03 | NKIRAS1                      |   |   |
| chr2.0005679673  | 0.99  | 8.14E-03 |                              |   |   |
| chr12.0110563292 | -1.13 | 8.16E-03 | IFT81                        |   |   |
| chr12.0005678978 | 1.08  | 8.20E-03 |                              |   |   |
| chr3.0071153921  | 0.89  | 8.21E-03 | FOXP1                        |   |   |
| chr12.0005275433 | 0.95  | 8.21E-03 |                              |   |   |
| chr7.0075004051  | -1.06 | 8.21E-03 | STAG3L1, AC006014.1          |   |   |
| chr14.0051538766 | 1.36  | 8.22E-03 | TRIM9                        |   |   |
| chr17.0073837683 | 0.73  | 8.26E-03 | UNC13D                       |   |   |
| chr18.0040318937 | -0.99 | 8.27E-03 |                              |   |   |

|                  |       |          |                   |   |   |
|------------------|-------|----------|-------------------|---|---|
| chr7.0074333014  | -0.82 | 8.28E-03 | PMS2P5            |   |   |
| chr16.0016734442 | -0.92 | 8.36E-03 |                   |   |   |
| chr14.0095999996 | -0.98 | 8.36E-03 | SNHG10, GLRX5     |   |   |
| chr6.0027950800  | 0.81  | 8.39E-03 |                   |   |   |
| chr13.0082065577 | -0.88 | 8.41E-03 |                   |   |   |
| chr20.0036854808 | 0.88  | 8.42E-03 | KIAA1755          |   |   |
| chr11.0067049045 | -0.78 | 8.42E-03 |                   |   |   |
| chr15.0032004823 | -0.89 | 8.43E-03 | OTUD7A            |   |   |
| chr5.0050585672  | 0.78  | 8.43E-03 |                   |   |   |
| chr12.0131392155 | -0.95 | 8.56E-03 |                   |   |   |
| chr17.0042636770 | 0.89  | 8.56E-03 | FZD2              | X |   |
| chr20.0017403368 | -1.05 | 8.58E-03 | PCSK2             |   |   |
| chr16.0004815786 | -0.92 | 8.61E-03 | ZNF500            |   |   |
| chr12.0000650002 | 0.80  | 8.61E-03 | B4GALNT3          |   |   |
| chr16.0001334537 | 0.98  | 8.66E-03 |                   |   |   |
| chr13.0026651855 | 0.91  | 8.66E-03 |                   |   |   |
| chr17.0064774558 | 0.74  | 8.75E-03 | PRKCA             |   |   |
| chr2.0119616334  | 0.85  | 8.76E-03 |                   |   |   |
| chr8.0135941900  | 0.92  | 8.77E-03 |                   |   |   |
| chr5.0083244775  | 0.77  | 8.77E-03 | EDIL3             |   |   |
| chr22.0025563508 | 0.98  | 8.79E-03 | KIAA1671          |   | X |
| chr17.0034406350 | -0.90 | 8.80E-03 | AC069363.1        |   |   |
| chr17.0046524375 | 0.92  | 8.85E-03 |                   |   |   |
| chr6.0074643904  | -0.86 | 8.86E-03 |                   |   |   |
| chr18.0046475320 | -1.11 | 8.87E-03 |                   |   |   |
| chr20.0047278938 | 1.01  | 8.94E-03 | PREX1             |   | X |
| chr11.0035250260 | 0.88  | 8.96E-03 | CD44              |   |   |
| chr12.0002398915 | -0.68 | 8.97E-03 |                   |   |   |
| chr2.0020378233  | -1.01 | 8.98E-03 |                   |   |   |
| chr14.0053315566 | 1.08  | 9.10E-03 |                   |   |   |
| chr3.0035240556  | 0.91  | 9.11E-03 |                   |   |   |
| chr15.0069894932 | 0.89  | 9.14E-03 | RP11-279F6.3      |   |   |
| chr3.0139013512  | 0.77  | 9.22E-03 | MRPS22            |   |   |
| chr13.0095256511 | -1.49 | 9.26E-03 | GPR180            |   |   |
| chr20.0044107407 | 0.90  | 9.27E-03 | AL031663.1, WFDC2 |   |   |
| chr17.0049983647 | 0.86  | 9.27E-03 | CA10              |   |   |
| chr13.0030932893 | 1.02  | 9.29E-03 | LINC00426         |   |   |
| chr11.0120972213 | 0.86  | 9.30E-03 | TECTA             |   | X |
| chr12.0019243112 | 0.92  | 9.50E-03 |                   |   |   |
| chr12.0066742963 | 0.91  | 9.53E-03 |                   |   |   |
| chr20.0021535931 | 1.19  | 9.62E-03 |                   |   | X |



|                  |       |          |                       |   |   |
|------------------|-------|----------|-----------------------|---|---|
| chr19.0050184400 | -0.89 | 9.62E-03 | PRMT1                 |   |   |
| chr6.0111244762  | 0.79  | 9.65E-03 |                       |   |   |
| chr2.0001598523  | -1.06 | 9.74E-03 | AC144450.1            |   |   |
| chr14.0057436305 | 0.87  | 9.75E-03 | OTX2-AS1              |   |   |
| chr3.0026305995  | 0.86  | 9.77E-03 |                       |   |   |
| chr17.0078441727 | 0.86  | 9.79E-03 | NPTX1                 |   |   |
| chr3.0132565636  | 0.80  | 9.82E-03 | NPHP3-AS1             |   |   |
| chr16.0088184978 | 1.18  | 9.82E-03 |                       |   |   |
| chr12.0039484618 | -0.88 | 9.83E-03 | RP11-554L12.1         |   | X |
| chr2.0207422413  | 0.81  | 9.87E-03 | ADAM23                |   |   |
| chr11.0112152163 | -0.94 | 9.88E-03 | RP11-356J5.12         |   |   |
| chr12.0095411841 | -0.93 | 9.91E-03 |                       |   |   |
| chr22.0038573766 | 1.39  | 9.96E-03 | PLA2G6                | X |   |
| chr12.0102034085 | 0.71  | 9.97E-03 | MYBPC1                | X |   |
| chr2.0075449181  | -1.09 | 1.00E-02 |                       |   | X |
| chr14.0089833851 | 1.32  | 1.01E-02 |                       |   |   |
| chr10.0091818139 | -0.91 | 1.01E-02 |                       |   |   |
| chr12.0103102106 | 1.00  | 1.02E-02 |                       |   |   |
| chr5.0128430539  | 1.21  | 1.03E-02 | ISOC1                 |   |   |
| chr3.0053806824  | 1.12  | 1.04E-02 |                       |   |   |
| chr12.0120234027 | 0.94  | 1.04E-02 | CIT                   |   |   |
| chr13.0111606387 | -0.88 | 1.04E-02 |                       |   |   |
| chr18.0021691205 | -0.87 | 1.05E-02 | TTC39C                |   |   |
| chr3.0083809794  | 0.82  | 1.05E-02 |                       |   |   |
| chr13.0114825688 | -1.31 | 1.05E-02 | RASA3                 |   |   |
| chr20.0040847575 | 1.27  | 1.05E-02 | PTPRT                 |   |   |
| chr18.0043301302 | 0.93  | 1.06E-02 | RP11-116O18.3         |   |   |
| chr12.0122768292 | -0.94 | 1.06E-02 | CLIP1                 |   |   |
| chr3.0047630484  | 0.84  | 1.06E-02 | SMARCC1               |   |   |
| chr13.0047010408 | -0.86 | 1.06E-02 | PPP1R2P4, KIAA0226L   |   |   |
| chr13.0019443315 | -1.11 | 1.06E-02 | ANKRD20A9P            |   |   |
| chr11.0116340736 | 0.84  | 1.06E-02 |                       |   |   |
| chr17.0031370105 | 0.86  | 1.06E-02 | ASIC2                 |   |   |
| chr8.0086566777  | 0.97  | 1.06E-02 |                       |   |   |
| chr11.0076392234 | 1.23  | 1.06E-02 | RP11-672A2.3          |   |   |
| chr5.0106822941  | -1.17 | 1.06E-02 | EFNA5                 |   |   |
| chr20.0056321421 | 0.85  | 1.06E-02 |                       |   |   |
| chr12.0085198936 | -0.84 | 1.06E-02 |                       |   |   |
| chr15.0089869670 | -0.89 | 1.06E-02 | POLG                  |   |   |
| chr16.0078800215 | 0.93  | 1.07E-02 | WWOX                  |   |   |
| chr20.0062445219 | -0.90 | 1.07E-02 | ZBTB46, RP4-583P15.11 |   |   |

|                  |       |          |               |  |   |
|------------------|-------|----------|---------------|--|---|
| chr7.0042657968  | -1.04 | 1.11E-02 |               |  |   |
| chr12.0112591200 | -0.75 | 1.11E-02 | TRAFD1        |  |   |
| chr4.0041302228  | 0.74  | 1.11E-02 |               |  |   |
| chr16.0057821860 | 0.81  | 1.11E-02 | KIFC3         |  |   |
| chr11.0099244166 | 0.71  | 1.11E-02 | CNTN5         |  |   |
| chr2.0223550141  | -1.08 | 1.11E-02 | MOGAT1        |  |   |
| chr22.0018376899 | 0.75  | 1.11E-02 |               |  |   |
| chr10.0080833721 | -1.11 | 1.13E-02 | ZMIZ1         |  |   |
| chr3.0108773581  | -0.77 | 1.13E-02 | MORC1         |  |   |
| chr12.0008403064 | -0.99 | 1.13E-02 |               |  |   |
| chr20.0036843383 | 0.98  | 1.13E-02 |               |  |   |
| chr6.0006687652  | 1.08  | 1.14E-02 |               |  |   |
| chr6.0000281849  | 0.84  | 1.14E-02 |               |  |   |
| chr12.0054043247 | -1.13 | 1.14E-02 | ATP5G2        |  |   |
| chr20.0001412499 | -0.84 | 1.15E-02 |               |  |   |
| chr20.0048603774 | 0.90  | 1.15E-02 | SNAI1         |  |   |
| chr19.0047299878 | 0.91  | 1.16E-02 |               |  |   |
| chr5.0174825487  | 1.19  | 1.17E-02 |               |  |   |
| chr15.0068885184 | 0.88  | 1.17E-02 | CORO2B        |  | X |
| chr9.0138974172  | -0.90 | 1.17E-02 | NACC2         |  |   |
| chr20.0043391328 | 1.32  | 1.17E-02 | RIMS4         |  |   |
| chr12.0025101805 | 1.72  | 1.17E-02 | BCAT1         |  |   |
| chr14.0020089147 | -1.69 | 1.17E-02 | RP11-597A11.1 |  |   |
| chr1.0032307779  | -0.83 | 1.18E-02 | RP11-84A19.2  |  |   |
| chr17.0034580968 | 1.69  | 1.19E-02 | TBC1D3C       |  |   |
| chr6.0140996256  | 0.82  | 1.19E-02 |               |  |   |
| chr14.0059509566 | -1.00 | 1.19E-02 |               |  |   |
| chr13.0037937255 | -0.92 | 1.19E-02 |               |  |   |
| chr15.0079292108 | 0.85  | 1.20E-02 | RASGRF1       |  | X |
| chr13.0107176083 | -1.68 | 1.20E-02 | EFNB2         |  |   |
| chr15.0070210541 | 0.99  | 1.20E-02 |               |  |   |
| chr2.0010200647  | 1.30  | 1.21E-02 | CYS1          |  |   |
| chr7.0025548858  | 0.75  | 1.22E-02 |               |  |   |
| chr20.0052298155 | -0.85 | 1.22E-02 |               |  |   |
| chr20.0060928261 | -0.97 | 1.23E-02 | RP11-157P1.5  |  |   |
| chr6.0166756539  | -1.15 | 1.23E-02 |               |  |   |
| chr20.0036859462 | 0.89  | 1.23E-02 |               |  |   |
| chr13.0021819967 | 1.03  | 1.24E-02 |               |  |   |
| chr2.0209313215  | -0.83 | 1.24E-02 | PTH2R         |  |   |
| chr12.0114887143 | 0.96  | 1.25E-02 |               |  |   |
| chr15.0050873417 | 0.87  | 1.25E-02 | TRPM7         |  |   |

|                  |       |          |                       |  |   |
|------------------|-------|----------|-----------------------|--|---|
| chr6.0008223055  | 0.86  | 1.26E-02 |                       |  |   |
| chr16.0011058849 | -0.82 | 1.26E-02 | CLEC16A               |  |   |
| chr7.0044807421  | 1.17  | 1.26E-02 | ZMIZ2                 |  |   |
| chr15.0066557418 | -1.14 | 1.27E-02 |                       |  |   |
| chr14.0061919248 | -0.88 | 1.28E-02 | PRKCH                 |  |   |
| chr6.0015748745  | 0.85  | 1.28E-02 |                       |  |   |
| chr12.0130090963 | 0.92  | 1.28E-02 | TMEM132D              |  |   |
| chr15.0078076885 | 0.71  | 1.28E-02 |                       |  |   |
| chr13.0100623759 | 1.33  | 1.28E-02 | ZIC5                  |  |   |
| chr12.0124860589 | 0.99  | 1.29E-02 | NCOR2                 |  |   |
| chr2.0062702536  | 1.09  | 1.29E-02 |                       |  |   |
| chr14.0094629010 | 0.86  | 1.29E-02 | PPP4R4                |  |   |
| chr10.0097051250 | 0.90  | 1.29E-02 |                       |  |   |
| chr13.0099413484 | -0.83 | 1.29E-02 |                       |  |   |
| chr13.0033765016 | -1.51 | 1.30E-02 | STARD13               |  |   |
| chr16.0089069833 | 1.03  | 1.30E-02 |                       |  | X |
| chr11.0063901203 | 0.83  | 1.30E-02 | MACROD1               |  |   |
| chr11.0000597676 | -0.74 | 1.30E-02 | PHRF1                 |  |   |
| chr9.0079793512  | 1.19  | 1.31E-02 | VPS13A                |  |   |
| chr20.0038382953 | -0.98 | 1.32E-02 |                       |  |   |
| chr13.0104109509 | 0.87  | 1.33E-02 |                       |  |   |
| chr15.0040545511 | 1.20  | 1.33E-02 | RP11-133K1.2, PAK6    |  |   |
| chr3.0178199704  | 0.83  | 1.33E-02 | KCNMB2                |  |   |
| chr16.0029168316 | 1.09  | 1.33E-02 | RP11-426C22.5         |  |   |
| chr6.0127687678  | 1.38  | 1.33E-02 |                       |  |   |
| chr11.0070384416 | 1.39  | 1.34E-02 |                       |  |   |
| chr3.0099514929  | -0.84 | 1.34E-02 | COL8A1                |  |   |
| chr3.0196595774  | -1.33 | 1.34E-02 | SENP5                 |  |   |
| chr6.0073290272  | 1.30  | 1.34E-02 |                       |  |   |
| chr19.0009468870 | 0.74  | 1.36E-02 | ZNF559-ZNF177, ZNF177 |  |   |
| chr2.0204746463  | -1.07 | 1.37E-02 |                       |  |   |
| chr14.0039235379 | 1.02  | 1.37E-02 | LINC00639             |  |   |
| chr3.0125867487  | 0.78  | 1.37E-02 | ALDH1L1               |  |   |
| chr15.0051183110 | 1.16  | 1.38E-02 |                       |  |   |
| chr11.0115343899 | 0.82  | 1.38E-02 | CADM1                 |  |   |
| chr3.0056912875  | 0.84  | 1.38E-02 | ARHGEF3               |  |   |
| chr12.0056810802 | -0.86 | 1.38E-02 |                       |  |   |
| chr11.0046483909 | 0.74  | 1.39E-02 | AMBRA1                |  | X |
| chr5.0143251840  | -0.96 | 1.39E-02 |                       |  |   |
| chr17.0080152801 | -0.75 | 1.39E-02 | CCDC57                |  |   |
| chr3.0075160661  | 0.82  | 1.39E-02 |                       |  |   |

|                  |       |          |               |  |   |
|------------------|-------|----------|---------------|--|---|
| chr20.0024775451 | 1.04  | 1.39E-02 |               |  |   |
| chr14.0096856226 | -0.83 | 1.39E-02 |               |  |   |
| chr12.0109897832 | 0.79  | 1.42E-02 | KCTD10        |  |   |
| chr18.0077608332 | 1.01  | 1.42E-02 |               |  |   |
| chr18.0023185698 | -1.22 | 1.43E-02 |               |  | X |
| chr14.0049874442 | -0.87 | 1.43E-02 |               |  |   |
| chr14.0105753103 | -1.05 | 1.43E-02 | BRF1          |  |   |
| chr2.0069171202  | 1.37  | 1.43E-02 |               |  |   |
| chr17.0011356330 | -1.04 | 1.44E-02 |               |  |   |
| chr3.0037374195  | 0.73  | 1.44E-02 | GOLGA4        |  |   |
| chr12.0113335076 | -1.19 | 1.44E-02 | RPH3A         |  |   |
| chr3.0059224627  | 0.74  | 1.44E-02 |               |  |   |
| chr8.0001251943  | 0.71  | 1.44E-02 |               |  |   |
| chr3.0180905890  | -0.73 | 1.44E-02 | SOX2-OT       |  |   |
| chr6.0031008851  | 1.01  | 1.45E-02 |               |  |   |
| chr12.0084953248 | -0.83 | 1.45E-02 |               |  |   |
| chr20.0035201174 | 1.15  | 1.46E-02 | RP5-977B1.7   |  |   |
| chr22.0049199174 | 1.15  | 1.46E-02 | FAM19A5       |  |   |
| chr22.0028173173 | 0.98  | 1.48E-02 | MN1           |  |   |
| chr12.0095457527 | -1.05 | 1.48E-02 | NR2C1         |  |   |
| chr6.0032026797  | 0.92  | 1.48E-02 | TNXB          |  |   |
| chr2.0102423165  | 1.08  | 1.48E-02 | MAP4K4        |  |   |
| chr18.0045776354 | -0.50 | 1.48E-02 | ZBTB7C        |  |   |
| chr20.0055621592 | -1.35 | 1.48E-02 |               |  |   |
| chr14.0081456317 | 0.92  | 1.48E-02 | TSHR          |  |   |
| chr8.0140921136  | 0.73  | 1.48E-02 | TRAPPC9       |  |   |
| chr20.0058775716 | 1.03  | 1.48E-02 | RP5-1043L13.1 |  |   |
| chr13.0036606864 | 1.01  | 1.50E-02 |               |  |   |
| chr5.0032690664  | 0.95  | 1.50E-02 | NPR3          |  |   |
| chr13.0096130928 | -1.29 | 1.50E-02 | CLDN10        |  |   |
| chr2.0235873378  | 0.97  | 1.50E-02 | SH3BP4        |  |   |
| chr20.0003316125 | -0.87 | 1.50E-02 | C20orf194     |  |   |
| chr11.0031087495 | 0.90  | 1.50E-02 | DCDC1         |  |   |
| chr15.0031451635 | 1.32  | 1.50E-02 |               |  |   |
| chr13.0079040535 | 0.93  | 1.50E-02 | RNF219-AS1    |  |   |
| chr20.0055728952 | -1.07 | 1.51E-02 |               |  |   |
| chr15.0039110124 | -1.22 | 1.51E-02 |               |  |   |
| chr20.0038724310 | 1.58  | 1.51E-02 |               |  |   |
| chr20.0060933723 | 1.35  | 1.51E-02 |               |  |   |
| chr5.0057845264  | 0.72  | 1.51E-02 | CTD-2117L12.1 |  |   |
| chr15.0066646204 | 1.05  | 1.51E-02 | TIPIN         |  |   |

|                  |       |          |                       |  |   |
|------------------|-------|----------|-----------------------|--|---|
| chr7.0005517660  | 1.20  | 1.52E-02 | FBXL18, AC092171.4    |  |   |
| chr12.0123942691 | 1.43  | 1.52E-02 | SNRNP35               |  |   |
| chr14.0100588329 | 1.29  | 1.52E-02 | EVL                   |  |   |
| chr17.0077908058 | 1.10  | 1.53E-02 | TBC1D16               |  |   |
| chr13.0063769342 | 0.90  | 1.53E-02 | LINC00376             |  |   |
| chr3.0148729673  | 1.21  | 1.53E-02 | GYG1                  |  |   |
| chr20.0034214499 | -0.92 | 1.53E-02 | CPNE1                 |  | X |
| chr11.0094428046 | 1.13  | 1.53E-02 | RP11-867G2.8          |  | X |
| chr19.0014089299 | -1.25 | 1.53E-02 | RFX1                  |  |   |
| chr9.0136600382  | 0.85  | 1.53E-02 | SARDH                 |  |   |
| chr14.0052593986 | -0.81 | 1.54E-02 | RP11-1033H12.1        |  |   |
| chr17.0008219019 | 1.36  | 1.54E-02 | ARHGEF15              |  |   |
| chr12.0122984696 | -1.30 | 1.55E-02 | ZCCHC8                |  |   |
| chr11.0132617559 | 0.82  | 1.55E-02 | OPCML                 |  |   |
| chr12.0026672531 | 1.28  | 1.56E-02 | ITPR2                 |  |   |
| chr20.0001813479 | -1.42 | 1.56E-02 |                       |  |   |
| chr3.0004241375  | 0.85  | 1.57E-02 | SUMF1                 |  |   |
| chr15.0041023492 | 1.01  | 1.58E-02 | RAD51                 |  | X |
| chr12.0049484577 | -1.38 | 1.58E-02 | DHH, RP11-386G11.8    |  |   |
| chr11.0020344257 | 0.84  | 1.58E-02 |                       |  |   |
| chr9.0066955241  | 0.83  | 1.58E-02 |                       |  |   |
| chr15.0065043833 | 0.81  | 1.58E-02 | RBPM52                |  |   |
| chr20.0062589386 | -1.64 | 1.58E-02 | ZNF512B, CTD-3184A7.4 |  |   |
| chr18.0068629472 | 0.92  | 1.58E-02 |                       |  |   |
| chr6.0019413218  | 0.86  | 1.58E-02 |                       |  |   |
| chr20.0062259792 | 1.46  | 1.59E-02 |                       |  |   |
| chr15.0034108303 | 0.90  | 1.59E-02 | RYR3                  |  |   |
| chr19.0002867898 | 1.12  | 1.59E-02 | ZNF556                |  |   |
| chr2.0129166371  | -1.03 | 1.60E-02 |                       |  |   |
| chr12.0106148484 | 0.83  | 1.60E-02 |                       |  |   |
| chr13.0041752980 | -1.01 | 1.60E-02 |                       |  |   |
| chr20.0062522605 | -1.21 | 1.60E-02 | TPD52L2               |  |   |
| chr12.0107831478 | -0.72 | 1.61E-02 | BTBD11                |  |   |
| chr20.0061284334 | 1.30  | 1.62E-02 | SLCO4A1               |  |   |
| chr6.0168843099  | 1.25  | 1.62E-02 | SMOC2                 |  |   |
| chr5.0171756702  | -0.83 | 1.62E-02 | SH3PXD2B              |  |   |
| chr20.0023859143 | -0.97 | 1.62E-02 | CST5                  |  | X |
| chr6.0166347327  | 0.86  | 1.62E-02 | PDE10A, LINC00473     |  |   |
| chr12.0031882241 | 1.81  | 1.62E-02 |                       |  |   |
| chr5.0058092517  | 0.83  | 1.62E-02 | RAB3C, RP11-479O16.1  |  |   |
| chr20.0062786731 | 1.17  | 1.62E-02 | MYT1                  |  |   |

|                  |       |          |                |   |  |
|------------------|-------|----------|----------------|---|--|
| chr6.0099135339  | 0.89  | 1.63E-02 |                |   |  |
| chr22.0044562387 | 0.98  | 1.63E-02 | PARVB          |   |  |
| chr18.0018706758 | -0.92 | 1.63E-02 |                |   |  |
| chr19.0015108434 | -0.92 | 1.63E-02 | SLC1A6         |   |  |
| chr9.0139395217  | 0.80  | 1.63E-02 | NOTCH1         | X |  |
| chr14.0103649648 | 0.84  | 1.64E-02 |                |   |  |
| chr15.0069854566 | 1.02  | 1.64E-02 |                |   |  |
| chr15.0068872137 | 1.16  | 1.64E-02 |                |   |  |
| chr3.0120314864  | 0.88  | 1.64E-02 |                |   |  |
| chr15.0025955428 | 0.50  | 1.64E-02 | ATP10A         |   |  |
| chr15.0027786719 | 0.94  | 1.64E-02 | RP11-100M12.3  |   |  |
| chr3.0055523173  | -0.95 | 1.64E-02 | WNT5A          |   |  |
| chr15.0079601574 | 1.12  | 1.64E-02 |                |   |  |
| chr6.0168625864  | 0.78  | 1.64E-02 |                |   |  |
| chr3.0182987901  | -0.82 | 1.65E-02 | MCF2L2, B3GNT5 |   |  |
| chr15.0041080358 | 1.40  | 1.65E-02 | DNAJC17        |   |  |
| chr12.0001858063 | 0.85  | 1.65E-02 | ADIPOR2        |   |  |
| chr2.0237073838  | -1.07 | 1.65E-02 |                |   |  |
| chr15.0101866025 | -1.19 | 1.65E-02 |                |   |  |
| chr3.0012923687  | 0.81  | 1.66E-02 | RP11-767C1.1   |   |  |
| chr15.0028716221 | -0.86 | 1.66E-02 |                |   |  |
| chr11.0065358078 | 1.30  | 1.66E-02 | EHBP1L1        |   |  |
| chr22.0047242843 | 0.86  | 1.66E-02 | TBC1D22A       |   |  |
| chr20.0044458275 | -0.95 | 1.66E-02 | TNNC2          |   |  |
| chr20.0057986154 | -0.63 | 1.67E-02 |                |   |  |
| chr19.0001367607 | 0.84  | 1.67E-02 | MUM1           |   |  |
| chr16.0058824222 | 0.74  | 1.67E-02 | RP11-410D17.2  |   |  |
| chr5.0176295797  | 0.81  | 1.67E-02 | UNC5A          |   |  |
| chr12.0058003396 | 1.61  | 1.67E-02 | DTX3           |   |  |
| chr12.0091564554 | 0.97  | 1.68E-02 | DCN            | X |  |
| chr7.0003271465  | -0.82 | 1.68E-02 |                |   |  |
| chr18.0056046635 | -0.66 | 1.68E-02 | NEDD4L         | X |  |
| chr20.0062149203 | -1.49 | 1.68E-02 |                |   |  |
| chr13.0034225558 | -1.10 | 1.68E-02 | RP11-141M1.3   |   |  |
| chr17.0035165969 | 1.07  | 1.69E-02 |                |   |  |
| chr22.0025600824 | 1.10  | 1.70E-02 | CRYBB3         |   |  |
| chr15.0068583382 | 0.98  | 1.70E-02 | FEM1B          |   |  |
| chr16.0058757515 | 0.88  | 1.70E-02 | GOT2           |   |  |
| chr16.0004604746 | 0.77  | 1.71E-02 |                |   |  |
| chr22.0019865215 | -0.85 | 1.71E-02 | TXNRD2         |   |  |
| chr6.0151404627  | -0.84 | 1.71E-02 | MTHFD1L        |   |  |

|                  |       |          |                      |   |   |
|------------------|-------|----------|----------------------|---|---|
| chr15.0091398741 | 1.06  | 1.71E-02 |                      |   |   |
| chr15.0051203970 | 1.12  | 1.72E-02 |                      |   |   |
| chr17.0073633572 | -0.75 | 1.72E-02 | RECQL5, SMIM5        |   |   |
| chr12.0029430585 | -0.88 | 1.73E-02 | FAR2                 |   |   |
| chr13.0099129570 | -1.16 | 1.73E-02 | STK24                |   |   |
| chr2.0092014991  | 1.15  | 1.73E-02 |                      |   |   |
| chr12.0120832604 | 1.40  | 1.73E-02 | RP1-166H1.2          |   |   |
| chr6.0027780652  | 1.16  | 1.73E-02 |                      |   |   |
| chr14.0024851275 | 1.46  | 1.74E-02 |                      |   | X |
| chr19.0004099560 | 1.04  | 1.74E-02 | MAP2K2               |   |   |
| chr15.0064816687 | -0.75 | 1.74E-02 | ZNF609               | X |   |
| chr5.0035853643  | -1.07 | 1.75E-02 | IL7R                 |   |   |
| chr14.0020835244 | -0.88 | 1.75E-02 | TEP1                 |   |   |
| chr20.0035325831 | 0.81  | 1.76E-02 | NDRG3                |   |   |
| chr11.0044343296 | 0.93  | 1.76E-02 |                      |   |   |
| chr11.0114042360 | 1.09  | 1.76E-02 | ZBTB16               |   |   |
| chr15.0079071423 | -1.02 | 1.77E-02 |                      |   |   |
| chr2.0226496814  | 0.82  | 1.77E-02 | NYAP2                |   |   |
| chr19.0046196188 | -1.15 | 1.77E-02 | QPCTL                |   |   |
| chr3.0182830735  | -0.82 | 1.78E-02 | MCCC1                |   |   |
| chr22.0032743558 | 0.81  | 1.79E-02 |                      |   |   |
| chr15.0082273478 | 0.84  | 1.80E-02 | RP11-276M12.1        |   |   |
| chr12.0049603111 | -0.71 | 1.81E-02 | TUBA1C               |   |   |
| chr2.0033057636  | -0.85 | 1.81E-02 | LINC00486            |   |   |
| chr22.0048252957 | 0.90  | 1.82E-02 |                      |   |   |
| chr20.0056026012 | -0.67 | 1.83E-02 |                      |   |   |
| chr12.0129310781 | -1.27 | 1.83E-02 |                      |   |   |
| chr17.0042857648 | 0.91  | 1.83E-02 | ADAM11               |   |   |
| chr12.0008857266 | 0.81  | 1.84E-02 | RIMKLB               |   |   |
| chr6.0036799126  | -0.94 | 1.84E-02 | CPNE5                |   |   |
| chr14.0031513408 | 1.04  | 1.84E-02 | AP4S1                |   |   |
| chr15.0084324496 | 0.95  | 1.84E-02 | ADAMTSL3             |   |   |
| chr2.0020377557  | -0.98 | 1.84E-02 |                      |   |   |
| chr15.0067062701 | 0.73  | 1.84E-02 | SMAD6                |   |   |
| chr17.0017415526 | 1.11  | 1.84E-02 | PEMT                 |   |   |
| chr9.0139001670  | -0.83 | 1.84E-02 |                      |   |   |
| chr9.0094949218  | 0.97  | 1.85E-02 |                      |   |   |
| chr14.0099849307 | 1.10  | 1.85E-02 |                      |   | X |
| chr3.0151630654  | -0.77 | 1.85E-02 | RP11-454C18.2        |   |   |
| chr15.0063197466 | 0.93  | 1.85E-02 |                      |   |   |
| chr15.0064227585 | -0.86 | 1.85E-02 | DAPK2, RP11-111E14.1 |   |   |

|                  |       |          |                      |   |   |
|------------------|-------|----------|----------------------|---|---|
| chr16.0025617907 | 0.79  | 1.85E-02 |                      |   |   |
| chr18.0068364888 | 1.23  | 1.85E-02 |                      |   |   |
| chr5.0178715673  | -1.21 | 1.85E-02 | ADAMTS2              |   |   |
| chr11.0061341207 | 0.88  | 1.86E-02 | SYT7                 |   |   |
| chr18.0046834838 | -0.90 | 1.86E-02 | DYM                  |   |   |
| chr13.0051396659 | 1.42  | 1.86E-02 | DLEU7, DLEU7-AS1     |   |   |
| chr14.0024778911 | 0.90  | 1.86E-02 | CIDEB, LTB4R2        |   |   |
| chr10.0025246705 | 1.02  | 1.86E-02 |                      |   |   |
| chr3.0108046904  | -0.82 | 1.87E-02 | HHLA2                |   |   |
| chr11.0123445488 | 0.80  | 1.87E-02 | GRAMD1B              |   |   |
| chr12.0054131365 | 0.90  | 1.88E-02 |                      |   |   |
| chr2.0005433241  | -0.95 | 1.88E-02 |                      |   |   |
| chr8.0126981483  | -1.01 | 1.88E-02 |                      |   |   |
| chr22.0033886653 | 0.85  | 1.88E-02 | LARGE1               | X | X |
| chr20.0058035543 | 0.89  | 1.88E-02 |                      |   |   |
| chr18.0045862942 | -1.36 | 1.88E-02 |                      |   |   |
| chr15.0071754544 | -0.74 | 1.89E-02 | THSD4                |   |   |
| chr5.0007824030  | 1.10  | 1.89E-02 | ADCY2                |   |   |
| chr9.0038621990  | 1.68  | 1.89E-02 | FAM201A              |   |   |
| chr13.0042614083 | -0.82 | 1.89E-02 |                      |   |   |
| chr12.0000662536 | 1.56  | 1.89E-02 |                      |   |   |
| chr13.0115001386 | 1.06  | 1.90E-02 |                      |   |   |
| chr18.0072175316 | 0.89  | 1.90E-02 | CNDP2                |   |   |
| chr22.0039967081 | 0.85  | 1.90E-02 | CACNA1I              |   |   |
| chr2.0099422979  | 1.14  | 1.92E-02 | KIAA1211L            |   |   |
| chr11.0011613810 | 0.90  | 1.94E-02 | GALNT18              |   |   |
| chr3.0037333531  | 0.95  | 1.95E-02 |                      |   |   |
| chr12.0092402155 | 0.95  | 1.96E-02 | C12orf79             |   |   |
| chr12.0001087688 | 0.73  | 1.96E-02 | RAD52, RP11-359B12.2 |   |   |
| chr19.0052992415 | 0.72  | 1.97E-02 | ZNF578               |   |   |
| chr12.0055783991 | 1.29  | 1.97E-02 |                      |   |   |
| chr2.0098487920  | 0.84  | 1.97E-02 | TMEM131              |   |   |
| chr2.0116280845  | -0.88 | 1.98E-02 | DPP10                |   |   |
| chr16.0000583839 | 1.15  | 1.98E-02 | CAPN15               |   |   |
| chr18.0047250077 | -1.10 | 1.98E-02 |                      |   |   |
| chr14.0105048321 | 1.18  | 1.98E-02 | C14orf180            |   |   |
| chr11.0017693024 | 0.97  | 1.98E-02 |                      |   |   |
| chr11.0001037098 | -1.11 | 2.00E-02 |                      |   |   |
| chr6.0046368470  | 0.79  | 2.01E-02 | RCAN2                |   |   |
| chr15.0088721801 | 0.99  | 2.01E-02 |                      |   |   |
| chr13.0041995963 | -0.74 | 2.01E-02 |                      |   | X |



|                  |       |          |                              |   |   |
|------------------|-------|----------|------------------------------|---|---|
| chr12.0023350005 | 0.83  | 2.01E-02 | RP11-153K16.2                |   |   |
| chr16.0022205553 | 0.85  | 2.02E-02 |                              |   |   |
| chr11.0071150631 | -0.84 | 2.03E-02 | DHCR7                        |   |   |
| chr15.0084912101 | -1.35 | 2.05E-02 | GOLGA6L4                     |   |   |
| chr16.0078140608 | -0.83 | 2.05E-02 | WVOX                         |   |   |
| chr9.0075217586  | -1.13 | 2.05E-02 | TMC1                         |   |   |
| chr4.0112728255  | 0.66  | 2.05E-02 | RP11-269F21.1, RP11-269F21.2 |   |   |
| chr10.0108520582 | -0.76 | 2.06E-02 | SORCS1                       |   |   |
| chr12.0110438723 | 1.19  | 2.06E-02 | ANKRD13A                     |   |   |
| chr14.0096552963 | -0.90 | 2.06E-02 | C14orf132                    |   |   |
| chr12.0131418766 | -0.94 | 2.07E-02 |                              |   |   |
| chr11.0031121358 | -0.76 | 2.07E-02 | DCDC1                        |   |   |
| chr19.0033896553 | -1.31 | 2.07E-02 | PEPD                         |   |   |
| chr18.0057470391 | -0.82 | 2.07E-02 |                              |   |   |
| chr13.0021286449 | -1.33 | 2.07E-02 | IL17D                        |   |   |
| chr5.0001640848  | -1.11 | 2.07E-02 |                              |   |   |
| chr15.0093906869 | 0.84  | 2.08E-02 | RP11-266O8.1                 |   |   |
| chr11.0003440420 | -0.80 | 2.08E-02 | FAM86GP                      |   |   |
| chr14.0100427761 | -0.93 | 2.08E-02 |                              |   |   |
| chr3.0027929607  | 0.83  | 2.08E-02 | AC098973.2                   |   |   |
| chr17.0034501886 | 1.43  | 2.09E-02 | CTB-91J4.1, TBC1D3B          |   |   |
| chr18.0045057574 | -1.46 | 2.10E-02 | CTD-2130O13.1, RP11-157P23.2 |   |   |
| chr22.0039006789 | 0.79  | 2.10E-02 | FAM227A                      |   |   |
| chr5.0039219698  | 1.37  | 2.10E-02 | FYB                          |   |   |
| chr20.0024958641 | -0.50 | 2.10E-02 | APMAP                        |   |   |
| chr9.0092333879  | 0.89  | 2.10E-02 | RP11-316P17.2                |   |   |
| chr13.0089273198 | 0.87  | 2.10E-02 |                              |   |   |
| chr14.0024785859 | -1.21 | 2.10E-02 | LTB4R                        | X |   |
| chr12.0088429374 | 0.69  | 2.10E-02 | C12orf29                     |   |   |
| chr11.0134746717 | 0.97  | 2.10E-02 |                              |   |   |
| chr6.0075912320  | 1.13  | 2.10E-02 | COL12A1                      |   |   |
| chr20.0049342667 | 0.93  | 2.10E-02 |                              |   |   |
| chr10.0065475234 | -0.71 | 2.11E-02 | RP11-170M17.1                |   |   |
| chr12.0024898838 | 0.93  | 2.12E-02 | RP11-625L16.1                |   |   |
| chr14.0102059428 | 0.88  | 2.13E-02 |                              |   |   |
| chr3.0007060708  | 0.79  | 2.14E-02 | GRM7                         |   |   |
| chr8.0133070210  | 1.02  | 2.15E-02 | OC90                         |   | X |
| chr13.0094140396 | 0.79  | 2.15E-02 | GPC6                         |   |   |
| chr17.0059750714 | -0.82 | 2.15E-02 |                              |   |   |
| chr18.0045686939 | -0.69 | 2.15E-02 | ZBTB7C                       |   |   |
| chr18.0071611180 | -0.99 | 2.15E-02 | RP11-25L3.3                  |   |   |

|                  |       |          |                        |   |   |
|------------------|-------|----------|------------------------|---|---|
| chr20.0015588271 | 0.85  | 2.16E-02 | MACROD2                |   |   |
| chr6.0161063597  | -1.62 | 2.16E-02 | LPA                    |   |   |
| chr20.0042887008 | 0.97  | 2.16E-02 | GDAP1L1                |   |   |
| chr4.0112764777  | 0.65  | 2.17E-02 | RP11-269F21.3          |   |   |
| chr16.0079166247 | 0.85  | 2.17E-02 | RP11-679B19.2          |   |   |
| chr16.0079250798 | 0.76  | 2.17E-02 | RP11-679B19.2          |   |   |
| chr3.0141163289  | -0.83 | 2.17E-02 | ZBTB38                 |   |   |
| chr12.0115161241 | -0.82 | 2.17E-02 | RP4-601P9.2            |   |   |
| chr17.0062777136 | -1.17 | 2.18E-02 | hsa-mir-6080, PLEKHM1P |   |   |
| chr16.0089778878 | -1.08 | 2.18E-02 | VPS9D1, VPS9D1-AS1     |   |   |
| chr12.0033048797 | 2.07  | 2.18E-02 | PKP2                   | X |   |
| chr15.0066311980 | 1.36  | 2.18E-02 | MEGF11                 |   | X |
| chr11.0132475539 | 0.85  | 2.18E-02 | OPCML                  |   |   |
| chr22.0050508487 | -0.80 | 2.18E-02 | MLC1                   |   |   |
| chr11.0066315845 | 1.15  | 2.18E-02 | ACTN3                  | X |   |
| chr13.0096687076 | -0.81 | 2.19E-02 | UGGT2                  |   |   |
| chr12.0057856280 | 1.43  | 2.19E-02 | GLI1                   |   |   |
| chr18.0038321088 | 0.86  | 2.20E-02 |                        |   |   |
| chr5.0019575004  | -0.75 | 2.20E-02 | CDH18                  |   |   |
| chr11.0120447543 | 0.78  | 2.20E-02 | GRIK4                  |   |   |
| chr13.0026538260 | 1.26  | 2.21E-02 | ATP8A2                 | X | X |
| chr22.0024547472 | 0.78  | 2.21E-02 | CABIN1                 |   |   |
| chr20.0001821959 | -1.35 | 2.21E-02 |                        |   |   |
| chr14.0023070923 | -1.29 | 2.21E-02 | ABHD4                  |   |   |
| chr6.0164042394  | -0.87 | 2.22E-02 |                        |   |   |
| chr16.0070207297 | -1.02 | 2.22E-02 | RP11-296I10.3, CLEC18C |   |   |
| chr12.0113690924 | -0.84 | 2.22E-02 | TPCN1                  |   |   |
| chr10.0068355194 | -0.77 | 2.23E-02 | CTNNA3                 |   |   |
| chr22.0040358235 | 0.92  | 2.23E-02 | GRAP2, RP3-370M22.8    |   |   |
| chr2.0003882321  | 0.90  | 2.24E-02 |                        |   |   |
| chr19.0006913486 | 1.03  | 2.24E-02 | EMR1                   |   |   |
| chr20.0061767784 | 0.95  | 2.27E-02 |                        |   |   |
| chr22.0037302861 | 0.99  | 2.27E-02 |                        |   |   |
| chr17.0019035897 | -0.95 | 2.27E-02 | GRAPL                  |   |   |
| chr18.0074151887 | -0.54 | 2.27E-02 | ZNF516                 |   |   |
| chr11.0033420794 | -0.76 | 2.27E-02 |                        |   |   |
| chr17.0040439892 | 1.08  | 2.27E-02 | STAT5A                 |   |   |
| chr12.0113684022 | 1.97  | 2.27E-02 |                        |   |   |
| chr20.0062257281 | -0.72 | 2.27E-02 | GMEB2                  |   |   |
| chr6.0151652742  | 0.85  | 2.27E-02 | AKAP12                 |   |   |
| chr12.0085672242 | 0.89  | 2.27E-02 |                        |   |   |

|                  |       |          |                      |  |  |
|------------------|-------|----------|----------------------|--|--|
| chr2.0233983675  | 1.05  | 2.27E-02 | INPP5D               |  |  |
| chr12.0005562121 | 0.79  | 2.29E-02 | NTF3                 |  |  |
| chr12.0125131378 | 1.10  | 2.30E-02 |                      |  |  |
| chr22.0042606263 | -0.80 | 2.31E-02 | TCF20                |  |  |
| chr12.0131691177 | -1.19 | 2.31E-02 | RP11-638F5.1         |  |  |
| chr3.0018656789  | 0.75  | 2.32E-02 | AC144521.1           |  |  |
| chr6.0003438536  | 0.78  | 2.32E-02 | SLC22A23             |  |  |
| chr12.0110224997 | 1.05  | 2.34E-02 | TRPV4                |  |  |
| chr16.0057334568 | -1.47 | 2.34E-02 |                      |  |  |
| chr12.0009931166 | 0.78  | 2.35E-02 |                      |  |  |
| chr12.0027574674 | 0.92  | 2.35E-02 | ARNTL2, RP11-165P7.1 |  |  |
| chr22.0037997972 | -1.02 | 2.35E-02 |                      |  |  |
| chr15.0085245022 | -0.81 | 2.35E-02 | SEC11A               |  |  |
| chr3.0169444964  | -0.83 | 2.35E-02 |                      |  |  |
| chr2.0222301426  | 0.76  | 2.36E-02 | EPHA4                |  |  |
| chr10.0071267921 | -0.84 | 2.36E-02 |                      |  |  |
| chr10.0117820694 | 0.84  | 2.36E-02 | GFRA1                |  |  |
| chr16.0011595555 | -1.04 | 2.37E-02 | CTD-3088G3.8         |  |  |
| chr12.0024994558 | 1.02  | 2.37E-02 | BCAT1                |  |  |
| chr16.0084857412 | -1.06 | 2.37E-02 | CRISPLD2             |  |  |
| chr6.0013510456  | 0.86  | 2.37E-02 |                      |  |  |
| chr12.0115255939 | -1.45 | 2.37E-02 |                      |  |  |
| chr13.0053624408 | 0.80  | 2.37E-02 | OLFM4                |  |  |
| chr2.0211575755  | 0.94  | 2.38E-02 |                      |  |  |
| chr8.0145046909  | 1.10  | 2.39E-02 | PLEC                 |  |  |
| chr6.0053524907  | 0.84  | 2.39E-02 | KLHL31               |  |  |
| chr12.0025937825 | 1.36  | 2.39E-02 | RP11-443N24.2        |  |  |
| chr11.0125773076 | -1.02 | 2.39E-02 | PUS3                 |  |  |
| chr18.0010315725 | 0.88  | 2.40E-02 |                      |  |  |
| chr14.0024827522 | -0.87 | 2.40E-02 |                      |  |  |
| chr15.0080588199 | -0.81 | 2.40E-02 | LINC00927            |  |  |
| chr2.0086023752  | -1.17 | 2.40E-02 |                      |  |  |
| chr2.0006950261  | 1.00  | 2.40E-02 |                      |  |  |
| chr2.0103747925  | -0.71 | 2.40E-02 | AC073987.1           |  |  |
| chr14.0097571434 | 0.93  | 2.40E-02 |                      |  |  |
| chr19.0000608811 | 0.97  | 2.40E-02 | HCN2                 |  |  |
| chr15.0079233994 | 0.79  | 2.41E-02 | CTSH                 |  |  |
| chr18.0072250823 | 1.05  | 2.41E-02 | CNDP1                |  |  |
| chr3.0119813692  | 1.83  | 2.41E-02 |                      |  |  |
| chr19.0000751159 | 0.86  | 2.42E-02 | MISP                 |  |  |
| chr16.0085744228 | 1.23  | 2.43E-02 | C16orf74             |  |  |

|                  |       |          |                             |  |   |
|------------------|-------|----------|-----------------------------|--|---|
| chr6.0116464670  | -1.06 | 2.44E-02 | NT5DC1, COL10A1             |  |   |
| chr15.0065563447 | 1.20  | 2.44E-02 | PARP16                      |  |   |
| chr15.0052550022 | 1.03  | 2.44E-02 | MYO5C                       |  |   |
| chr6.0022021274  | 0.83  | 2.45E-02 | CASC15                      |  |   |
| chr16.0082451812 | 0.86  | 2.45E-02 |                             |  |   |
| chr11.0134548961 | 0.98  | 2.47E-02 |                             |  |   |
| chr2.0227661381  | 0.88  | 2.48E-02 | IRS1                        |  |   |
| chr12.0057634891 | -1.27 | 2.48E-02 |                             |  |   |
| chr16.0083174768 | 0.72  | 2.48E-02 | CDH13                       |  |   |
| chr19.0038215633 | -0.69 | 2.48E-02 |                             |  |   |
| chr17.0015380552 | 0.78  | 2.48E-02 | TVP23C-CDRT4, TVP23C, CDRT4 |  |   |
| chr12.0018568899 | -0.79 | 2.48E-02 | PIK3C2G                     |  |   |
| chr11.0062357965 | -0.84 | 2.49E-02 | MIR3654, TUT1               |  |   |
| chr20.0007521120 | 0.81  | 2.49E-02 |                             |  |   |
| chr3.0151160316  | -0.79 | 2.49E-02 | IGSF10                      |  |   |
| chr20.0037174617 | 0.91  | 2.49E-02 | RALGAPB                     |  |   |
| chr6.0064193431  | -0.99 | 2.49E-02 |                             |  |   |
| chr2.0039419989  | -0.78 | 2.49E-02 | CDKL4                       |  |   |
| chr16.0005263031 | -0.91 | 2.49E-02 |                             |  |   |
| chr20.0031210733 | 1.36  | 2.50E-02 |                             |  |   |
| chr15.0101536131 | 0.82  | 2.50E-02 | LRRK1                       |  |   |
| chr5.0179114073  | 0.76  | 2.50E-02 | CANX, HMGB3P22              |  |   |
| chr11.0134214876 | 0.96  | 2.50E-02 | GLB1L2                      |  |   |
| chr3.0151203613  | -0.77 | 2.51E-02 |                             |  |   |
| chr9.0095906540  | 1.14  | 2.51E-02 |                             |  |   |
| chr2.0217964246  | 0.74  | 2.51E-02 |                             |  | X |
| chr9.0112810447  | 0.92  | 2.51E-02 | PALM2-AKAP2, AKAP2          |  |   |
| chr12.0049409447 | 0.89  | 2.51E-02 | RP11-386G11.5, PRKAG1       |  |   |
| chr17.0012769886 | 0.92  | 2.51E-02 | ARHGAP44                    |  |   |
| chr3.0046503548  | -1.14 | 2.51E-02 | LTF                         |  |   |
| chr7.0100812136  | 0.94  | 2.51E-02 |                             |  |   |
| chr6.0016993940  | 0.81  | 2.52E-02 |                             |  |   |
| chr11.0061310165 | 0.86  | 2.52E-02 | SYT7                        |  |   |
| chr20.0007889631 | 0.75  | 2.52E-02 | HAO1                        |  |   |
| chr17.0012479544 | 0.81  | 2.53E-02 | LINC00670                   |  |   |
| chr10.0049211544 | -1.00 | 2.53E-02 |                             |  |   |
| chr4.0137501021  | 0.71  | 2.53E-02 |                             |  |   |
| chr13.0026590625 | 0.87  | 2.53E-02 |                             |  |   |
| chr3.0025114359  | 0.78  | 2.53E-02 | AC133680.1                  |  |   |
| chr11.0043605047 | 1.24  | 2.54E-02 | HSD17B12                    |  |   |
| chr14.0092901413 | 0.92  | 2.54E-02 | SLC24A4                     |  |   |

|                  |       |          |                              |   |  |
|------------------|-------|----------|------------------------------|---|--|
| chr6.0032038784  | -1.12 | 2.55E-02 | TNXB                         |   |  |
| chr3.0052345311  | 1.17  | 2.55E-02 |                              |   |  |
| chr18.0010485679 | 0.82  | 2.55E-02 | APCDD1                       |   |  |
| chr16.0068174112 | 0.73  | 2.55E-02 | NFATC3                       |   |  |
| chr5.0172106425  | -0.80 | 2.56E-02 | NEURL1B                      |   |  |
| chr8.0133928368  | -0.69 | 2.56E-02 | TG                           |   |  |
| chr19.0048669578 | 0.70  | 2.57E-02 | LIG1                         |   |  |
| chr9.0127203900  | 0.76  | 2.57E-02 |                              |   |  |
| chr12.0116797924 | 1.11  | 2.57E-02 |                              |   |  |
| chr18.0057193836 | -1.06 | 2.57E-02 | CCBE1                        |   |  |
| chr12.0131863915 | -0.80 | 2.57E-02 |                              |   |  |
| chr14.0080484300 | 1.32  | 2.57E-02 |                              |   |  |
| chr17.0015394553 | 1.18  | 2.58E-02 |                              |   |  |
| chr10.0098457342 | 0.66  | 2.58E-02 | PIK3AP1                      |   |  |
| chr10.0028726670 | 0.83  | 2.58E-02 | RP11-351M16.3                |   |  |
| chr3.0055518374  | 0.96  | 2.59E-02 | WNT5A                        | X |  |
| chr14.0073686279 | -0.82 | 2.59E-02 | PSEN1                        |   |  |
| chr20.0059215410 | 0.90  | 2.60E-02 |                              |   |  |
| chr19.0039622344 | 1.24  | 2.61E-02 | PAK4                         |   |  |
| chr10.0135088481 | -0.99 | 2.61E-02 | ADAM8                        |   |  |
| chr18.0020959985 | -1.40 | 2.61E-02 | TMEM241                      |   |  |
| chr16.0029187478 | 0.79  | 2.62E-02 | RP11-426C22.5                |   |  |
| chr12.0130600247 | 0.95  | 2.62E-02 |                              |   |  |
| chr9.0130395772  | 0.86  | 2.62E-02 | STXBP1                       |   |  |
| chr13.0099295245 | -0.79 | 2.63E-02 |                              |   |  |
| chr16.0058789143 | 0.98  | 2.63E-02 | RP11-410D17.2                |   |  |
| chr20.0051420595 | -0.85 | 2.64E-02 |                              |   |  |
| chr18.0013140322 | -0.84 | 2.64E-02 | RP11-807E13.3                |   |  |
| chr17.0007260381 | -1.16 | 2.64E-02 | TMEM95                       |   |  |
| chr8.0143193665  | -0.90 | 2.64E-02 |                              |   |  |
| chr20.0003661537 | -0.70 | 2.64E-02 | ADAM33                       |   |  |
| chr15.0088583056 | 0.93  | 2.64E-02 | NTRK3                        |   |  |
| chr11.0074247056 | -1.13 | 2.66E-02 | POLD3                        |   |  |
| chr12.0062584454 | 2.13  | 2.67E-02 | FAM19A2                      |   |  |
| chr15.0068126938 | 0.92  | 2.67E-02 | RP11-34F13.3, RP11-34F13.2   |   |  |
| chr18.0054716316 | -0.74 | 2.67E-02 |                              |   |  |
| chr12.0005069874 | 0.77  | 2.67E-02 |                              |   |  |
| chr2.0052278383  | -0.89 | 2.67E-02 | AC007682.1                   |   |  |
| chr12.0004810242 | 1.06  | 2.68E-02 | RP11-234B24.6, RP11-234B24.2 |   |  |
| chr12.0003126663 | 0.82  | 2.68E-02 | TEAD4                        | X |  |
| chr9.0140239835  | 0.71  | 2.68E-02 | EXD3                         |   |  |

|                  |       |          |              |  |   |
|------------------|-------|----------|--------------|--|---|
| chr20.0017899412 | 0.79  | 2.69E-02 |              |  |   |
| chr9.0079448403  | 0.77  | 2.70E-02 | PRUNE2       |  |   |
| chr5.0105341037  | -0.80 | 2.70E-02 |              |  |   |
| chr15.0051604337 | 0.66  | 2.72E-02 | CYP19A1      |  |   |
| chr3.0020088712  | -1.20 | 2.74E-02 | KAT2B        |  |   |
| chr3.0174382932  | 0.84  | 2.74E-02 | NAALADL2     |  |   |
| chr15.0069794562 | 0.86  | 2.75E-02 | RP11-279F6.1 |  |   |
| chr15.0050280046 | -1.14 | 2.75E-02 | ATP8B4       |  |   |
| chr9.0140352405  | -0.84 | 2.75E-02 | NSMF         |  |   |
| chr22.0016645749 | -1.03 | 2.75E-02 | ZNF72P       |  |   |
| chr15.0070105816 | 0.92  | 2.75E-02 |              |  |   |
| chr12.0099615042 | 0.85  | 2.75E-02 | ANKS1B       |  |   |
| chr22.0048641448 | -0.84 | 2.78E-02 |              |  | X |
| chr22.0038507208 | 0.82  | 2.79E-02 |              |  |   |
| chr3.0046490317  | -0.88 | 2.79E-02 |              |  |   |
| chr21.0046301789 | -0.77 | 2.79E-02 |              |  |   |
| chr19.0007069967 | 0.95  | 2.79E-02 | ZNF557       |  |   |
| chr12.0130962583 | 0.84  | 2.79E-02 | RIMBP2       |  |   |
| chr2.0240905174  | 0.91  | 2.80E-02 | NDUFA10      |  |   |
| chr14.0064598744 | 0.76  | 2.80E-02 | SYNE2, ESR2  |  |   |
| chr13.0103185856 | -0.91 | 2.80E-02 |              |  |   |
| chr8.0005458906  | 0.75  | 2.80E-02 |              |  |   |
| chr20.0061428843 | -1.18 | 2.80E-02 | MRGBP        |  |   |
| chr13.0028550394 | -1.35 | 2.80E-02 |              |  |   |
| chr18.0044478678 | 0.80  | 2.80E-02 | PIAS2        |  |   |
| chr14.0101841897 | 0.85  | 2.80E-02 |              |  |   |
| chr20.0011633534 | 0.86  | 2.83E-02 |              |  |   |
| chr7.0129996892  | 0.96  | 2.83E-02 | CPA5         |  |   |
| chr6.0015896174  | 0.91  | 2.83E-02 |              |  |   |
| chr18.0019067987 | -0.72 | 2.83E-02 | GREB1L       |  |   |
| chr12.0125017105 | 0.91  | 2.83E-02 | NCOR2        |  |   |
| chr17.0055520767 | 0.99  | 2.84E-02 | MSI2         |  |   |
| chr14.0103740089 | 1.33  | 2.84E-02 |              |  |   |
| chr12.0101787956 | 0.89  | 2.84E-02 | ARL1         |  |   |
| chr2.0216879665  | 0.75  | 2.86E-02 | MREG, PECR   |  |   |
| chr6.0146505684  | 0.81  | 2.86E-02 | GRM1         |  |   |
| chr8.0010191232  | 0.92  | 2.86E-02 | MSRA         |  |   |
| chr18.0008264490 | -0.88 | 2.86E-02 | PTPRM        |  | X |
| chr15.0069952346 | 0.84  | 2.86E-02 | RP11-279F6.3 |  |   |
| chr6.0064254064  | -1.13 | 2.87E-02 | PTP4A1       |  | X |
| chr20.0062134308 | -1.16 | 2.87E-02 | RP4-697K14.3 |  |   |

|                  |       |          |               |  |   |
|------------------|-------|----------|---------------|--|---|
| chr20.0045845539 | 0.97  | 2.87E-02 | ZMYND8        |  |   |
| chr6.0090109650  | 0.80  | 2.87E-02 | RRAGD         |  |   |
| chr14.0102047819 | 0.81  | 2.88E-02 |               |  |   |
| chr20.0051361280 | 0.70  | 2.88E-02 |               |  |   |
| chr13.0114802848 | -1.14 | 2.89E-02 | RASA3         |  |   |
| chr14.0039262070 | 0.95  | 2.90E-02 | LINC00639     |  |   |
| chr3.0060919598  | -0.86 | 2.90E-02 | FHIT          |  |   |
| chr14.0100142498 | 1.27  | 2.90E-02 | HHIPL1        |  | X |
| chr13.0057743067 | 1.49  | 2.90E-02 | PRR20E        |  |   |
| chr20.0019192507 | 1.60  | 2.91E-02 |               |  |   |
| chr12.0105820659 | 0.92  | 2.92E-02 |               |  |   |
| chr15.0041696379 | -0.89 | 2.92E-02 |               |  |   |
| chr13.0041773854 | 0.91  | 2.92E-02 |               |  | X |
| chr5.0011248947  | 0.82  | 2.92E-02 | CTNND2        |  |   |
| chr5.0109607702  | 0.70  | 2.93E-02 |               |  |   |
| chr3.0153560971  | 0.81  | 2.95E-02 | RP11-23D24.2  |  |   |
| chr6.0064215203  | -0.91 | 2.95E-02 |               |  |   |
| chr18.0025139835 | 0.87  | 2.95E-02 | RP11-739N10.1 |  |   |
| chr22.0027286206 | 0.84  | 2.95E-02 |               |  |   |
| chr3.0017562733  | 0.85  | 2.95E-02 | TBC1D5        |  |   |
| chr11.0069688120 | -1.00 | 2.95E-02 |               |  |   |
| chr19.0043892591 | -0.95 | 2.96E-02 |               |  | X |
| chr9.0006183267  | 0.77  | 2.96E-02 |               |  |   |
| chr6.0026856434  | -1.45 | 2.97E-02 | GUSBP2        |  |   |
| chr20.0047137619 | 0.92  | 2.98E-02 |               |  |   |
| chr20.0006101929 | -0.89 | 2.98E-02 | FERMT1        |  |   |
| chr14.0101661156 | 0.82  | 2.98E-02 |               |  |   |
| chr2.0024165918  | -0.76 | 2.98E-02 | UBXN2A        |  |   |
| chr4.0153641626  | 0.88  | 2.98E-02 |               |  | X |
| chr3.0068791660  | 0.99  | 2.98E-02 | FAM19A4       |  |   |
| chr11.0066364146 | 0.74  | 2.98E-02 | CCS           |  |   |
| chr5.0053421823  | -0.75 | 2.99E-02 | ARL15         |  |   |
| chr5.0141659848  | -1.25 | 2.99E-02 |               |  |   |
| chr8.0031067834  | -0.90 | 2.99E-02 |               |  |   |
| chr14.0019604345 | -1.62 | 3.00E-02 |               |  |   |
| chr12.0066049238 | 1.02  | 3.00E-02 | RP11-221N13.4 |  |   |
| chr17.0003462368 | 1.01  | 3.00E-02 |               |  |   |
| chr12.0001400446 | 0.95  | 3.00E-02 | ERC1          |  |   |
| chr3.0194674177  | 1.15  | 3.00E-02 |               |  |   |
| chr12.0053678199 | 0.86  | 3.00E-02 | ESPL1         |  |   |
| chr15.0096647029 | -1.11 | 3.00E-02 |               |  |   |

|                  |       |          |                   |   |   |
|------------------|-------|----------|-------------------|---|---|
| chr16.0069662747 | -0.74 | 3.01E-02 | NFAT5             |   |   |
| chr12.0111902693 | 0.87  | 3.01E-02 | ATXN2             |   |   |
| chr14.0089721594 | -1.01 | 3.01E-02 | FOXN3             |   |   |
| chr20.0060645662 | -0.51 | 3.01E-02 |                   |   |   |
| chr9.0137475754  | 0.76  | 3.02E-02 |                   |   |   |
| chr9.0030518167  | 0.79  | 3.03E-02 |                   |   |   |
| chr3.0123550508  | 0.84  | 3.04E-02 | MYLK              | X |   |
| chr5.0022752463  | 0.79  | 3.04E-02 | CDH12             |   |   |
| chr17.0046221813 | 0.89  | 3.04E-02 | SKAP1             |   |   |
| chr11.0003144685 | 1.45  | 3.04E-02 | OSBPL5            |   |   |
| chr7.0147581299  | -0.83 | 3.04E-02 | CNTNAP2           |   |   |
| chr12.0003241735 | 1.04  | 3.05E-02 | TSPAN9            |   |   |
| chr10.0133276830 | -1.03 | 3.05E-02 |                   |   |   |
| chr2.0120041552  | 1.08  | 3.05E-02 |                   |   |   |
| chr6.0102097023  | 0.79  | 3.05E-02 | GRIK2             |   |   |
| chr20.0025725007 | -0.78 | 3.05E-02 |                   |   |   |
| chr17.0043356139 | -0.97 | 3.05E-02 | MAP3K14           |   |   |
| chr9.0139651444  | 0.79  | 3.05E-02 | LCN8              |   |   |
| chr8.0008003698  | 0.78  | 3.05E-02 |                   |   |   |
| chr16.0083606272 | 0.86  | 3.06E-02 |                   |   |   |
| chr15.0039802950 | 1.00  | 3.06E-02 |                   |   | X |
| chr9.0117623760  | 0.87  | 3.06E-02 |                   |   |   |
| chr19.0035611941 | 0.88  | 3.06E-02 | FXD3              |   |   |
| chr14.0104178670 | 1.04  | 3.06E-02 | XRCC3, AL049840.1 |   |   |
| chr14.0077398971 | 1.00  | 3.07E-02 |                   |   |   |
| chr14.0078123724 | 0.97  | 3.07E-02 |                   |   |   |
| chr15.0057403882 | -0.99 | 3.08E-02 | TCF12             | X |   |
| chr15.0063368030 | 1.15  | 3.08E-02 |                   |   |   |
| chr18.0056146980 | 0.84  | 3.11E-02 |                   |   |   |
| chr8.0008300606  | -0.90 | 3.11E-02 |                   |   |   |
| chr15.0044284871 | 0.86  | 3.11E-02 | FRMD5             |   |   |
| chr11.0071049344 | 0.76  | 3.12E-02 |                   |   |   |
| chr3.0047116517  | -0.76 | 3.13E-02 | SETD2             |   |   |
| chr11.0111316435 | -0.86 | 3.13E-02 | POU2AF1           |   |   |
| chr17.0006001954 | 1.04  | 3.13E-02 | WSCD1             |   |   |
| chr16.0087698990 | -0.90 | 3.14E-02 | JPH3              |   |   |
| chr13.0051846552 | 0.77  | 3.14E-02 | FAM124A           |   |   |
| chr18.0056046953 | -0.80 | 3.14E-02 | NEDD4L            | X |   |
| chr17.0020909292 | -1.05 | 3.14E-02 | USP22             |   |   |
| chr20.0031129482 | 1.35  | 3.14E-02 | C20orf112         |   |   |
| chr11.0118663188 | -1.12 | 3.14E-02 |                   |   |   |



|                  |       |          |                            |   |   |
|------------------|-------|----------|----------------------------|---|---|
| chr15.0073631717 | 0.97  | 3.15E-02 | HCN4, RP11-272D12.1        | X |   |
| chr5.0149566637  | -1.06 | 3.15E-02 |                            |   |   |
| chr3.0014041701  | 0.73  | 3.16E-02 | TPRXL                      |   |   |
| chr12.0050448047 | -0.77 | 3.17E-02 |                            |   |   |
| chr11.0020039824 | -0.75 | 3.17E-02 | NAV2                       |   |   |
| chr19.0013136364 | 0.97  | 3.17E-02 | NFIX                       |   |   |
| chr15.0091398642 | 1.21  | 3.17E-02 |                            |   |   |
| chr6.0057602917  | 0.99  | 3.18E-02 |                            |   |   |
| chr6.0034463322  | -0.78 | 3.18E-02 | PACSIN1                    |   |   |
| chr14.0086228692 | 0.97  | 3.18E-02 |                            |   | X |
| chr16.0058790064 | 0.92  | 3.18E-02 |                            |   |   |
| chr17.0016182623 | 0.71  | 3.19E-02 | PIGL                       |   |   |
| chr12.0123753032 | 1.83  | 3.19E-02 | CDK2AP1                    |   |   |
| chr13.0100145409 | 0.94  | 3.19E-02 |                            |   |   |
| chr20.0060061483 | 0.92  | 3.19E-02 | CDH4                       |   |   |
| chr16.0027852176 | 0.73  | 3.19E-02 | GSG1L                      |   |   |
| chr9.0134184484  | 0.75  | 3.19E-02 | PPAPDC3                    |   |   |
| chr14.0100291764 | 0.84  | 3.19E-02 | EML1                       |   |   |
| chr17.0035425610 | -1.12 | 3.19E-02 |                            |   |   |
| chr12.0123135330 | 0.99  | 3.19E-02 | HCAR1                      |   |   |
| chr18.0012466006 | 0.79  | 3.19E-02 | SPIRE1                     |   |   |
| chr9.0134177501  | 1.14  | 3.19E-02 |                            |   |   |
| chr13.0037125617 | 0.87  | 3.20E-02 |                            |   |   |
| chr5.0001359318  | 0.88  | 3.20E-02 |                            |   |   |
| chr18.0034431276 | -0.97 | 3.20E-02 | KIAA1328                   |   | X |
| chr10.0080956875 | 0.98  | 3.20E-02 | ZMIZ1                      |   |   |
| chr18.0003580666 | 0.77  | 3.20E-02 | DLGAP1, RP11-710M11.1      |   |   |
| chr15.0101700896 | 0.91  | 3.21E-02 |                            |   |   |
| chr18.0029303612 | -0.65 | 3.21E-02 |                            |   |   |
| chr22.0040127961 | 0.90  | 3.21E-02 |                            |   | X |
| chr16.0010906798 | 1.14  | 3.21E-02 | TVP23A                     |   |   |
| chr13.0114071457 | -1.12 | 3.21E-02 |                            |   |   |
| chr3.0043677568  | 0.73  | 3.21E-02 | ANO10                      |   |   |
| chr14.0071251384 | 0.80  | 3.21E-02 | MAP3K9                     |   |   |
| chr11.0132717823 | 0.93  | 3.21E-02 |                            |   |   |
| chr17.0043631042 | -0.87 | 3.21E-02 | RP11-798G7.6, RP11-798G7.7 |   | X |
| chr12.0083248478 | 0.87  | 3.21E-02 | TMTC2                      |   |   |
| chr14.0023201418 | 0.88  | 3.21E-02 | CTD-2555K7.2               |   |   |
| chr12.0006650910 | 1.16  | 3.21E-02 | IFFO1                      |   |   |
| chr3.0084228558  | 0.84  | 3.21E-02 |                            |   |   |
| chr8.0067351838  | 0.96  | 3.22E-02 | ADHFE1                     |   |   |

|                  |       |          |                          |   |   |
|------------------|-------|----------|--------------------------|---|---|
| chr18.0056064648 | 0.82  | 3.22E-02 |                          |   | X |
| chr18.0040084697 | 0.88  | 3.22E-02 | LINC00907                |   |   |
| chr12.0001414241 | 1.01  | 3.22E-02 |                          |   |   |
| chr13.0036104053 | -0.83 | 3.24E-02 | NBEA                     |   |   |
| chr20.0033566149 | 0.86  | 3.24E-02 | MYH7B                    |   |   |
| chr7.0143885174  | 0.84  | 3.24E-02 | ARHGEF35                 |   |   |
| chr15.0078122914 | -1.02 | 3.25E-02 |                          |   | X |
| chr20.0059336133 | 0.88  | 3.25E-02 |                          |   |   |
| chr20.0055066923 | 0.80  | 3.25E-02 | RTFDC1, GCNT7            |   |   |
| chr16.0029296720 | -1.00 | 3.25E-02 | SNX29P2                  |   |   |
| chr3.0052074225  | 1.20  | 3.25E-02 |                          |   |   |
| chr12.0114887448 | 0.71  | 3.26E-02 |                          |   |   |
| chr13.0042769050 | -0.86 | 3.26E-02 | DGKH                     |   |   |
| chr17.0020940382 | -1.05 | 3.26E-02 |                          |   |   |
| chr14.0077523673 | -0.74 | 3.26E-02 | RP11-7F17.5, RP11-7F17.4 |   |   |
| chr17.0027056417 | 0.84  | 3.26E-02 | NEK8                     |   |   |
| chr12.0067087331 | 0.82  | 3.27E-02 | GRIP1                    |   |   |
| chr8.0126703953  | 1.02  | 3.27E-02 |                          |   |   |
| chr2.0102623275  | -0.96 | 3.27E-02 | IL1R2                    |   |   |
| chr5.0010571406  | 0.73  | 3.27E-02 | ANKRD33B                 |   |   |
| chr20.0045457978 | -0.99 | 3.27E-02 |                          |   | X |
| chr12.0001312523 | 0.94  | 3.27E-02 |                          |   |   |
| chr11.0001245363 | 0.75  | 3.28E-02 | MUC5B                    |   |   |
| chr5.0000534067  | 0.96  | 3.28E-02 |                          |   |   |
| chr20.0006759498 | -0.98 | 3.28E-02 | BMP2                     | X |   |
| chr8.0027132793  | 0.87  | 3.28E-02 |                          |   |   |
| chr2.0037555152  | 0.80  | 3.28E-02 |                          |   |   |
| chr18.0038158241 | 1.28  | 3.28E-02 |                          |   |   |
| chr22.0018947523 | 0.87  | 3.29E-02 |                          |   |   |
| chr9.0085110033  | 0.78  | 3.30E-02 | RP11-15B24.5             |   |   |
| chr17.0036059462 | 0.99  | 3.30E-02 | HNF1B                    |   |   |
| chr12.0054366343 | 1.07  | 3.30E-02 | HOTAIR                   |   |   |
| chr2.0110781416  | 0.91  | 3.30E-02 |                          |   |   |
| chr15.0036298829 | 0.47  | 3.30E-02 | RP11-184D12.1            |   | X |
| chr11.0000732316 | -0.86 | 3.30E-02 |                          |   |   |
| chr14.0034000223 | -0.78 | 3.32E-02 | NPAS3                    |   |   |
| chr12.0050942855 | -0.64 | 3.32E-02 | DIP2B                    |   |   |
| chr13.0026508624 | 0.80  | 3.33E-02 |                          |   |   |
| chr19.0002032975 | 0.96  | 3.34E-02 | BTBD2                    |   |   |
| chr2.0010830783  | 0.97  | 3.34E-02 | RN7SL832P                |   |   |
| chr17.0016744139 | 0.81  | 3.34E-02 | KRT17P1                  |   |   |

|                  |       |          |                          |  |   |
|------------------|-------|----------|--------------------------|--|---|
| chr10.0133843269 | 0.79  | 3.34E-02 |                          |  |   |
| chr14.0080458717 | 0.78  | 3.34E-02 |                          |  |   |
| chr19.0056974990 | -0.66 | 3.34E-02 | ZNF667                   |  |   |
| chr11.0113209030 | 0.91  | 3.34E-02 | TTC12                    |  |   |
| chr2.0163392567  | 0.86  | 3.34E-02 | KCNH7                    |  |   |
| chr18.0049055189 | 0.85  | 3.35E-02 | RP11-267C16.1            |  |   |
| chr19.0005040201 | 0.71  | 3.36E-02 | KDM4B                    |  |   |
| chr5.0138906155  | 0.83  | 3.36E-02 | UBE2D2                   |  |   |
| chr8.0006631730  | 0.88  | 3.36E-02 |                          |  |   |
| chr20.0060852455 | -1.48 | 3.36E-02 | OSBPL2                   |  |   |
| chr3.0142010930  | 0.73  | 3.37E-02 |                          |  |   |
| chr17.0040699809 | -0.94 | 3.37E-02 | RP11-400F19.8, HSD17B1P1 |  |   |
| chr20.0035516795 | -1.04 | 3.37E-02 | TLDC2                    |  |   |
| chr17.0079561157 | -0.73 | 3.37E-02 | NPLOC4                   |  |   |
| chr13.0023711332 | 1.05  | 3.37E-02 |                          |  |   |
| chr13.0027300958 | 0.80  | 3.38E-02 |                          |  |   |
| chr11.0047470312 | 1.21  | 3.38E-02 | RAPSN                    |  |   |
| chr18.0057872243 | -0.61 | 3.39E-02 |                          |  |   |
| chr18.0041832689 | -0.67 | 3.39E-02 |                          |  |   |
| chr6.0035778755  | -0.90 | 3.39E-02 | LHFPL5                   |  |   |
| chr20.0036839379 | 1.39  | 3.39E-02 | KIAA1755                 |  |   |
| chr5.0000419577  | -0.92 | 3.39E-02 | AHRR                     |  |   |
| chr6.0041577098  | 0.76  | 3.40E-02 |                          |  |   |
| chr3.0070526101  | -0.95 | 3.40E-02 |                          |  | X |
| chr22.0020278589 | -0.94 | 3.40E-02 |                          |  |   |
| chr12.0130317295 | 1.01  | 3.43E-02 | TMEM132D                 |  |   |
| chr8.0144390809  | -0.68 | 3.43E-02 | TOP1MT                   |  |   |
| chr17.0034580276 | 1.58  | 3.43E-02 |                          |  |   |
| chr15.0092929384 | 0.82  | 3.43E-02 |                          |  |   |
| chr12.0125084212 | 0.82  | 3.44E-02 |                          |  |   |
| chr2.0101618347  | -1.50 | 3.44E-02 | AC016738.4, RPL31        |  |   |
| chr22.0016882915 | 0.92  | 3.45E-02 |                          |  |   |
| chr13.0053864412 | 0.94  | 3.47E-02 |                          |  |   |
| chr11.0031377518 | 0.84  | 3.48E-02 |                          |  |   |
| chr13.0034217766 | 1.31  | 3.49E-02 | RP11-141M1.3             |  |   |
| chr20.0036816189 | 1.35  | 3.49E-02 |                          |  |   |
| chr3.0073253115  | 0.75  | 3.49E-02 |                          |  |   |
| chr19.0004633885 | 0.91  | 3.49E-02 |                          |  |   |
| chr14.0055310671 | 0.89  | 3.49E-02 | GCH1                     |  |   |
| chr6.0027775525  | 0.90  | 3.49E-02 | HIST1H2BL                |  |   |
| chr16.0024360601 | -0.88 | 3.50E-02 | CACNG3                   |  | X |

|                  |       |          |                     |   |   |
|------------------|-------|----------|---------------------|---|---|
| chr12.0101992093 | 0.69  | 3.50E-02 | MYBPC1              | X |   |
| chr16.0073089170 | 0.95  | 3.50E-02 | ZFHX3               | X |   |
| chr8.0032435807  | 0.93  | 3.50E-02 | NRG1                | X |   |
| chr15.0025916524 | 1.19  | 3.50E-02 |                     |   |   |
| chr11.0007563239 | -1.17 | 3.50E-02 | PPFIBP2             |   |   |
| chr12.0015366373 | -0.93 | 3.50E-02 | RERG                |   |   |
| chr12.0085672520 | 0.91  | 3.51E-02 |                     |   |   |
| chr2.0187510417  | -0.74 | 3.51E-02 | ITGAV, AC017101.10  |   |   |
| chr18.0034981424 | 0.86  | 3.52E-02 | CELF4               |   |   |
| chr13.0025261023 | -0.88 | 3.52E-02 | ATP12A              |   |   |
| chr13.0087523944 | -0.73 | 3.52E-02 |                     |   |   |
| chr3.0085690798  | 0.79  | 3.52E-02 | CADM2               |   |   |
| chr13.0094965396 | -1.06 | 3.52E-02 |                     |   |   |
| chr14.0019584879 | -1.09 | 3.52E-02 | POTEG               |   |   |
| chr3.0182933209  | 0.94  | 3.52E-02 | MCF2L2              |   |   |
| chr20.0003253593 | -0.80 | 3.52E-02 | C20orf194           |   |   |
| chr17.0043116186 | 1.10  | 3.52E-02 | DCAKD               |   |   |
| chr9.0134177118  | 0.74  | 3.52E-02 |                     |   |   |
| chr18.0075254748 | 0.81  | 3.52E-02 | RP11-176N18.2       |   |   |
| chr12.0086658897 | -0.69 | 3.52E-02 | MGAT4C              |   |   |
| chr3.0124764584  | -0.82 | 3.52E-02 | HEG1                | X |   |
| chr3.0063474931  | 1.20  | 3.52E-02 | SYNPR, SYNPR-AS1    |   |   |
| chr12.0083294324 | -0.89 | 3.52E-02 |                     |   |   |
| chr20.0009570410 | -0.88 | 3.53E-02 | PAK7                |   | X |
| chr14.0074684538 | -1.50 | 3.53E-02 |                     |   |   |
| chr2.0037891039  | -0.68 | 3.53E-02 | CDC42EP3            |   |   |
| chr18.0009911881 | -0.55 | 3.55E-02 |                     |   |   |
| chr6.0043545539  | 0.78  | 3.55E-02 | POLH                |   |   |
| chr11.0009890439 | -0.75 | 3.55E-02 | SBF2, RP11-1H15.2   |   | X |
| chr14.0101293014 | 0.91  | 3.55E-02 | MEG3                |   |   |
| chr20.0041200406 | 0.99  | 3.56E-02 | PTPRT               |   |   |
| chr17.0001372384 | 0.91  | 3.57E-02 | MYO1C               |   |   |
| chr12.0056102222 | -1.35 | 3.58E-02 | ITGA7               | X |   |
| chr11.0078611395 | 0.83  | 3.58E-02 | TENM4               |   |   |
| chr16.0083085241 | 0.95  | 3.58E-02 |                     |   |   |
| chr12.0086907892 | -1.60 | 3.58E-02 |                     |   |   |
| chr9.0133773841  | 0.96  | 3.58E-02 |                     |   |   |
| chr15.0074468341 | 0.96  | 3.59E-02 | RP11-665J16.1, ISLR |   |   |
| chr20.0057899754 | -1.54 | 3.59E-02 | EDN3                | X |   |
| chr15.0068926667 | 0.83  | 3.60E-02 | CORO2B              |   |   |
| chr14.0068040530 | 0.89  | 3.60E-02 | PLEKHH1             |   |   |

|                  |       |          |                                       |  |   |
|------------------|-------|----------|---------------------------------------|--|---|
| chr20.0062795688 | 0.86  | 3.60E-02 | MYT1                                  |  |   |
| chr13.0099138076 | -1.05 | 3.60E-02 | STK24                                 |  |   |
| chr3.0157697371  | 0.77  | 3.60E-02 |                                       |  |   |
| chr11.0079647800 | 0.86  | 3.61E-02 |                                       |  |   |
| chr3.0069652360  | -0.81 | 3.61E-02 |                                       |  |   |
| chr15.0033687699 | 1.03  | 3.61E-02 | RYS3                                  |  |   |
| chr18.0061925980 | -0.98 | 3.62E-02 | RP11-146N18.1, RP11-909B2.1           |  |   |
| chr11.0133526342 | -1.06 | 3.62E-02 |                                       |  |   |
| chr14.0076013999 | -0.84 | 3.62E-02 |                                       |  |   |
| chr18.0010479529 | -0.99 | 3.62E-02 |                                       |  |   |
| chr12.0054425446 | -0.89 | 3.63E-02 | RP11-834C11.12, HOXC4, RP11-834C11.14 |  |   |
| chr20.0030700421 | -0.80 | 3.63E-02 | TM9SF4                                |  |   |
| chr6.0064895861  | -0.73 | 3.63E-02 | EYS                                   |  |   |
| chr2.0200709007  | 0.82  | 3.64E-02 | FTCDNL1                               |  | X |
| chr2.0029239643  | 1.01  | 3.64E-02 | FAM179A                               |  |   |
| chr15.0074468240 | 0.97  | 3.64E-02 |                                       |  |   |
| chr17.0065820540 | 0.98  | 3.66E-02 |                                       |  |   |
| chr13.0038159653 | 0.85  | 3.67E-02 | POSTN                                 |  |   |
| chr7.0157379472  | 0.65  | 3.67E-02 | PTPRN2                                |  |   |
| chr20.0059329248 | 1.03  | 3.68E-02 |                                       |  |   |
| chr16.0007362102 | 0.84  | 3.69E-02 | RBFOX1                                |  |   |
| chr3.0185230852  | -0.92 | 3.69E-02 | LIPH                                  |  |   |
| chr18.0020846541 | 0.83  | 3.69E-02 |                                       |  |   |
| chr20.0061962018 | -0.56 | 3.70E-02 | COL20A1                               |  | X |
| chr3.0005227732  | 1.01  | 3.71E-02 | AC026202.3                            |  |   |
| chr18.0074881019 | -0.89 | 3.71E-02 |                                       |  |   |
| chr2.0228610529  | 0.75  | 3.72E-02 |                                       |  |   |
| chr12.0064763138 | -0.80 | 3.72E-02 | RPS11P6, C12orf56                     |  |   |
| chr18.0057121773 | -0.68 | 3.72E-02 |                                       |  |   |
| chr12.0110906540 | 1.13  | 3.72E-02 | GPN3, FAM216A                         |  |   |
| chr17.0016607041 | 0.71  | 3.72E-02 | CCDC144A, RP11-219A15.1               |  |   |
| chr6.0116421257  | 1.40  | 3.72E-02 |                                       |  |   |
| chr9.0138695786  | 0.82  | 3.73E-02 |                                       |  |   |
| chr16.0021610035 | 1.52  | 3.74E-02 | METTL9                                |  |   |
| chr15.0101207241 | 0.93  | 3.74E-02 |                                       |  |   |
| chr13.0114004596 | 0.85  | 3.74E-02 | GRTP1                                 |  |   |
| chr3.0107987605  | 0.75  | 3.75E-02 | GPR156                                |  |   |
| chr3.0119990864  | -1.01 | 3.75E-02 | GPR156                                |  |   |
| chr14.0065692418 | -0.98 | 3.76E-02 |                                       |  |   |
| chr6.0006002032  | 0.78  | 3.76E-02 | NRN1                                  |  |   |
| chr16.0072961680 | 1.09  | 3.76E-02 |                                       |  |   |

|                  |       |          |                     |   |   |
|------------------|-------|----------|---------------------|---|---|
| chr15.0061098639 | -0.79 | 3.76E-02 | RORA                |   |   |
| chr12.0005616394 | 0.83  | 3.76E-02 |                     |   | X |
| chr13.0046244319 | -1.04 | 3.77E-02 |                     |   |   |
| chr14.0030107968 | -0.78 | 3.77E-02 | PRKD1               |   |   |
| chr12.0013475404 | 0.91  | 3.77E-02 |                     |   |   |
| chr5.0097421150  | -0.67 | 3.77E-02 |                     |   |   |
| chr17.0080427574 | 0.71  | 3.78E-02 | NARF                |   |   |
| chr5.0002753335  | -0.79 | 3.78E-02 | C5orf38             |   |   |
| chr20.0042103804 | -0.80 | 3.79E-02 |                     |   |   |
| chr14.0035050452 | 0.72  | 3.79E-02 | SNX6                |   |   |
| chr17.0066410246 | -1.08 | 3.80E-02 | ARSG, RP11-120M18.2 |   |   |
| chr15.0052013314 | 0.87  | 3.80E-02 |                     |   |   |
| chr22.0021387675 | -0.78 | 3.80E-02 | AC002472.11         |   |   |
| chr17.0001104049 | 0.79  | 3.82E-02 | ABR                 |   |   |
| chr20.0046916138 | -1.28 | 3.82E-02 |                     |   |   |
| chr9.0090919796  | 0.69  | 3.82E-02 |                     |   |   |
| chr6.0046597757  | -1.13 | 3.82E-02 | CYP39A1             |   |   |
| chr12.0051237500 | 0.84  | 3.82E-02 | TMPRSS12            |   |   |
| chr13.0107406162 | 0.78  | 3.82E-02 |                     |   |   |
| chr2.0032589400  | 0.72  | 3.82E-02 | BIRC6               |   |   |
| chr6.0123786070  | 0.67  | 3.83E-02 | TRDN, RP11-532N4.2  | X |   |
| chr20.0030437761 | -1.43 | 3.83E-02 | DUSP15, EDEM2       |   |   |
| chr13.0037521933 | 0.79  | 3.83E-02 |                     |   |   |
| chr20.0015164708 | 0.81  | 3.83E-02 |                     |   |   |
| chr20.0033803924 | 0.80  | 3.83E-02 |                     |   |   |
| chr6.0108307585  | -0.94 | 3.83E-02 |                     |   |   |
| chr16.0058802517 | 0.90  | 3.85E-02 |                     |   |   |
| chr2.0206422383  | 0.77  | 3.85E-02 | PARD3B              |   |   |
| chr19.0019550548 | -0.74 | 3.85E-02 | GATAD2A             |   |   |
| chr19.0034395854 | -1.18 | 3.86E-02 |                     |   |   |
| chr14.0068030779 | 0.81  | 3.86E-02 |                     |   |   |
| chr20.0019952933 | 0.78  | 3.86E-02 | RIN2                |   |   |
| chr18.0069465111 | 0.90  | 3.86E-02 |                     |   |   |
| chr12.0115761694 | 0.74  | 3.86E-02 |                     |   |   |
| chr18.0058082607 | -0.85 | 3.87E-02 |                     |   |   |
| chr13.0094394841 | 0.83  | 3.87E-02 |                     |   |   |
| chr12.0011069368 | -0.74 | 3.87E-02 | PRR4                |   |   |
| chr10.0047627474 | -0.94 | 3.87E-02 | ANTXRPL1            |   |   |
| chr16.0056310209 | 0.82  | 3.87E-02 | GNAO1               | X |   |
| chr14.0099473981 | 0.71  | 3.87E-02 |                     |   |   |
| chr9.0104249370  | 1.28  | 3.88E-02 | TMEM246             |   |   |

|                  |       |          |                    |  |   |
|------------------|-------|----------|--------------------|--|---|
| chr15.0070433178 | 1.03  | 3.88E-02 |                    |  |   |
| chr2.0064021225  | -0.75 | 3.89E-02 | WDPCP              |  |   |
| chr11.0024130715 | -0.63 | 3.89E-02 |                    |  |   |
| chr16.0024518034 | 0.82  | 3.89E-02 |                    |  |   |
| chr5.0150376736  | 0.72  | 3.89E-02 |                    |  |   |
| chr14.0080552094 | 0.89  | 3.89E-02 |                    |  |   |
| chr3.0012698352  | -1.00 | 3.90E-02 | RAF1               |  |   |
| chr5.0125672242  | 0.91  | 3.90E-02 |                    |  | X |
| chr11.0123461691 | 0.96  | 3.91E-02 | GRAMD1B            |  |   |
| chr2.0192842971  | 0.76  | 3.91E-02 | AC098617.1, TMEFF2 |  |   |
| chr11.0070006081 | 0.93  | 3.91E-02 | ANO1               |  |   |
| chr7.0072778744  | 1.05  | 3.91E-02 |                    |  |   |
| chr13.0106635027 | 0.89  | 3.91E-02 |                    |  |   |
| chr14.0088893480 | 0.92  | 3.91E-02 | SPATA7             |  |   |
| chr5.0013802634  | 0.78  | 3.92E-02 | DNAH5              |  |   |
| chr3.0055467569  | 0.72  | 3.92E-02 |                    |  |   |
| chr16.0061703704 | 0.91  | 3.92E-02 | CDH8               |  |   |
| chr10.0119381735 | -0.76 | 3.92E-02 |                    |  |   |
| chr12.0117066496 | -0.81 | 3.92E-02 |                    |  |   |
| chr12.0111021296 | -1.30 | 3.93E-02 |                    |  |   |
| chr11.0134399829 | 0.94  | 3.93E-02 |                    |  |   |
| chr7.0142705156  | 0.98  | 3.93E-02 |                    |  |   |
| chr11.0002124000 | 0.80  | 3.94E-02 |                    |  |   |
| chr12.0029201938 | 0.85  | 3.95E-02 |                    |  |   |
| chr12.0003140411 | 0.78  | 3.95E-02 |                    |  |   |
| chr13.0041472719 | -0.82 | 3.97E-02 | TPTE2P5            |  |   |
| chr16.0053400387 | -0.96 | 3.97E-02 | RP11-44F14.1       |  |   |
| chr12.0048360477 | -1.10 | 3.97E-02 | TMEM106C           |  |   |
| chr2.0131288961  | -0.92 | 3.97E-02 | AC013269.4         |  |   |
| chr3.0029699706  | -0.81 | 3.97E-02 | RBMS3              |  |   |
| chr6.0137017520  | -1.19 | 3.97E-02 | MAP3K5             |  |   |
| chr17.0076230868 | 0.83  | 3.98E-02 | TMEM235            |  |   |
| chr20.0062086604 | -1.94 | 3.98E-02 | KCNQ2              |  |   |
| chr13.0112732864 | -1.20 | 3.98E-02 |                    |  |   |
| chr11.0128294712 | -1.12 | 3.99E-02 |                    |  |   |
| chr7.0044621160  | 0.97  | 3.99E-02 | TMED4              |  |   |
| chr16.0069889050 | -0.67 | 4.00E-02 | WWP2               |  |   |
| chr12.0121371899 | 0.88  | 4.01E-02 |                    |  |   |
| chr5.0067769649  | -0.88 | 4.01E-02 |                    |  |   |
| chr14.0089977211 | 0.90  | 4.02E-02 | RP11-33N16.3       |  |   |
| chr16.0014591702 | -0.78 | 4.02E-02 | PARN               |  |   |

|                  |       |          |                 |  |   |
|------------------|-------|----------|-----------------|--|---|
| chr22.0038153720 | 0.85  | 4.02E-02 | NOL12, TRIOBP   |  |   |
| chr20.0021709627 | -0.84 | 4.02E-02 |                 |  |   |
| chr12.0014381690 | 0.82  | 4.02E-02 |                 |  |   |
| chr2.0027325377  | 0.84  | 4.03E-02 | CGREF1          |  |   |
| chr12.0048343861 | 0.78  | 4.03E-02 |                 |  |   |
| chr13.0068630715 | -0.79 | 4.06E-02 |                 |  |   |
| chr14.0105362383 | -0.47 | 4.06E-02 | CEP170B         |  |   |
| chr13.0113087924 | -1.10 | 4.06E-02 | SPACA7          |  |   |
| chr3.0167538268  | -0.74 | 4.06E-02 | SERPINI1        |  |   |
| chr5.0120145412  | -0.78 | 4.06E-02 |                 |  |   |
| chr15.0081041002 | 0.86  | 4.07E-02 | ABHD17C         |  |   |
| chr10.0049703673 | -0.72 | 4.07E-02 | ARHGAP22        |  |   |
| chr18.0007062524 | -1.03 | 4.08E-02 | LAMA1           |  | X |
| chr7.0095966645  | 0.79  | 4.08E-02 |                 |  |   |
| chr3.0054985490  | -1.29 | 4.08E-02 | CACNA2D3, LRTM1 |  |   |
| chr18.0011887551 | -0.93 | 4.09E-02 | MPPE1           |  |   |
| chr20.0030667631 | -0.77 | 4.09E-02 | HCK             |  | X |
| chr20.0061201229 | -1.29 | 4.10E-02 |                 |  |   |
| chr19.0015157692 | 0.77  | 4.10E-02 |                 |  |   |
| chr5.0136983239  | -0.72 | 4.10E-02 | KLHL3           |  |   |
| chr18.0043745227 | -0.80 | 4.11E-02 |                 |  |   |
| chr14.0104486538 | 0.85  | 4.14E-02 | TDRD9           |  |   |
| chr15.0070601410 | 0.91  | 4.14E-02 |                 |  |   |
| chr20.0052476982 | 0.85  | 4.14E-02 |                 |  |   |
| chr5.0057150022  | 0.90  | 4.14E-02 |                 |  |   |
| chr6.0064593503  | -0.76 | 4.14E-02 |                 |  |   |
| chr2.0239051535  | -0.77 | 4.15E-02 | KLHL30          |  |   |
| chr10.0020897233 | -0.66 | 4.15E-02 |                 |  |   |
| chr20.0059641710 | 1.19  | 4.16E-02 |                 |  | X |
| chr18.0073920398 | -0.87 | 4.16E-02 | MBP             |  |   |
| chr18.0074759150 | -0.93 | 4.16E-02 |                 |  |   |
| chr7.0128476506  | 0.83  | 4.17E-02 | FLNC            |  |   |
| chr3.0177310875  | 0.96  | 4.17E-02 | LINC00578       |  |   |
| chr12.0052735176 | 0.79  | 4.17E-02 |                 |  |   |
| chr6.0042416374  | 1.00  | 4.17E-02 | TRERF1          |  |   |
| chr16.0008943462 | 0.86  | 4.17E-02 | RP11-77H9.2     |  |   |
| chr15.0088742551 | 0.95  | 4.17E-02 |                 |  |   |
| chr22.0017715447 | -0.84 | 4.17E-02 |                 |  |   |
| chr16.0006735523 | -0.91 | 4.17E-02 | RP11-420N3.2    |  |   |
| chr18.0034823936 | -1.27 | 4.17E-02 | RP11-95O2.5     |  |   |
| chr10.0035244295 | -0.71 | 4.17E-02 |                 |  | X |



|                  |       |          |                         |  |   |
|------------------|-------|----------|-------------------------|--|---|
| chr2.0097217971  | 0.75  | 4.17E-02 | ARID5A                  |  |   |
| chr14.0100614373 | -0.53 | 4.17E-02 | DEGS2                   |  |   |
| chr6.0129931701  | 0.78  | 4.18E-02 | ARHGAP18                |  |   |
| chr5.0172685779  | 0.77  | 4.18E-02 |                         |  |   |
| chr5.0029564329  | 0.97  | 4.19E-02 |                         |  |   |
| chr14.0055604957 | 0.79  | 4.21E-02 | LGALS3                  |  |   |
| chr14.0021542358 | 0.75  | 4.21E-02 | ARHGEF40                |  | X |
| chr12.0120784045 | 0.74  | 4.22E-02 | MSI1                    |  |   |
| chr20.0057394000 | -1.31 | 4.23E-02 | GNAS-AS1                |  |   |
| chr18.0007109204 | -0.79 | 4.23E-02 |                         |  |   |
| chr19.0048481656 | -0.87 | 4.24E-02 | BSPH1                   |  |   |
| chr22.0032939718 | 0.75  | 4.24E-02 | SYN3                    |  |   |
| chr16.0089985975 | 0.76  | 4.25E-02 | MC1R, AC092143.1, TUBB3 |  |   |
| chr2.0002791603  | -0.90 | 4.25E-02 |                         |  |   |
| chr14.0045388379 | -0.72 | 4.25E-02 |                         |  |   |
| chr8.0143190895  | -1.05 | 4.26E-02 |                         |  |   |
| chr5.0002237179  | 0.78  | 4.26E-02 |                         |  |   |
| chr6.0157152467  | 0.83  | 4.26E-02 | ARID1B                  |  |   |
| chr5.0166490935  | -0.91 | 4.26E-02 |                         |  |   |
| chr21.0011090141 | 0.62  | 4.26E-02 | BAGE2                   |  |   |
| chr6.0149937814  | 0.70  | 4.26E-02 | KATNA1                  |  |   |
| chr12.0125896092 | -0.88 | 4.26E-02 | TMEM132B                |  |   |
| chr5.0134374357  | 0.79  | 4.27E-02 | C5orf66                 |  |   |
| chr15.0038773631 | -0.81 | 4.27E-02 | FAM98B                  |  |   |
| chr5.0036158752  | -1.03 | 4.27E-02 | SKP2                    |  |   |
| chr17.0036286930 | 1.72  | 4.27E-02 | TBC1D3F                 |  |   |
| chr17.0000947293 | 0.82  | 4.27E-02 |                         |  |   |
| chr11.0038706225 | 0.70  | 4.27E-02 |                         |  |   |
| chr6.0056842544  | 0.68  | 4.28E-02 | BEND6                   |  |   |
| chr3.0147130343  | 1.16  | 4.28E-02 | ZIC1                    |  |   |
| chr6.0064409774  | -0.67 | 4.28E-02 | PHF3                    |  |   |
| chr11.0019914387 | 0.75  | 4.28E-02 |                         |  |   |
| chr14.0096890099 | 0.99  | 4.28E-02 | AK7, PEBP1P1            |  |   |
| chr13.0050700606 | -1.26 | 4.29E-02 | DLEU1                   |  |   |
| chr16.0022622146 | -0.74 | 4.29E-02 | RP11-105C19.2           |  |   |
| chr5.0001857029  | -0.83 | 4.29E-02 |                         |  |   |
| chr20.0004410326 | 0.88  | 4.29E-02 |                         |  |   |
| chr6.0037591834  | 0.79  | 4.29E-02 |                         |  |   |
| chr20.0062595495 | 0.84  | 4.30E-02 | ZNF512B                 |  |   |
| chr12.0105595125 | -0.78 | 4.31E-02 | APPL2                   |  |   |
| chr14.0045712025 | 0.96  | 4.32E-02 | MIS18BP1                |  |   |

|                  |       |          |                       |   |  |
|------------------|-------|----------|-----------------------|---|--|
| chr13.0074125683 | 0.92  | 4.32E-02 | LINC00393             |   |  |
| chr15.0101230722 | 0.95  | 4.32E-02 |                       |   |  |
| chr3.0124501859  | -1.09 | 4.33E-02 | ITGB5, ITGB5-AS1      | X |  |
| chr15.0075471349 | -1.16 | 4.33E-02 |                       |   |  |
| chr2.0107872629  | 0.68  | 4.35E-02 | AC006227.1            |   |  |
| chr13.0059923263 | 0.95  | 4.36E-02 |                       |   |  |
| chr20.0019505014 | 0.94  | 4.37E-02 | SLC24A3               |   |  |
| chr15.0065254751 | -0.83 | 4.38E-02 |                       |   |  |
| chr14.0045511394 | 0.86  | 4.38E-02 | KLHL28, FAM179B       |   |  |
| chr18.0036591252 | 0.81  | 4.38E-02 |                       |   |  |
| chr14.0034925961 | 0.73  | 4.38E-02 | EGLN3, SPTSSA         |   |  |
| chr2.0021265146  | 0.78  | 4.38E-02 | APOB                  |   |  |
| chr18.0003303444 | 0.74  | 4.38E-02 | RP11-838N2.5          |   |  |
| chr6.0161034892  | -1.68 | 4.39E-02 |                       |   |  |
| chr13.0046815728 | 0.76  | 4.39E-02 | LRRC63                |   |  |
| chr12.0108923729 | 0.85  | 4.39E-02 | SART3                 |   |  |
| chr18.0035426619 | 0.80  | 4.39E-02 |                       |   |  |
| chr12.0129876394 | 0.77  | 4.39E-02 |                       |   |  |
| chr10.0097063113 | 0.82  | 4.39E-02 |                       |   |  |
| chr2.0045170583  | 0.78  | 4.40E-02 | SIX3                  |   |  |
| chr8.0010004530  | -0.66 | 4.41E-02 |                       |   |  |
| chr22.0032955536 | -0.87 | 4.41E-02 |                       |   |  |
| chr13.0078313090 | -0.51 | 4.41E-02 | SLAIN1                |   |  |
| chr12.0094075470 | 0.84  | 4.42E-02 | CRADD                 |   |  |
| chr20.0039774739 | 1.20  | 4.42E-02 | PLCG1                 |   |  |
| chr22.0045606206 | 0.81  | 4.43E-02 | KIAA0930              |   |  |
| chr11.0077903359 | -1.33 | 4.44E-02 | USP35                 |   |  |
| chr16.0048541221 | 0.72  | 4.45E-02 |                       |   |  |
| chr6.0043196488  | -0.83 | 4.46E-02 | DNPH1                 |   |  |
| chr11.0086628083 | 1.02  | 4.46E-02 | PRSS23, RP11-736K20.5 |   |  |
| chr12.0006868231 | 0.90  | 4.46E-02 | MLF2                  |   |  |
| chr9.0018487650  | 0.78  | 4.46E-02 | ADAMTSL1              |   |  |
| chr14.0020925176 | -1.06 | 4.47E-02 | APEX1                 |   |  |
| chr15.0046178808 | -0.70 | 4.47E-02 | RP11-718O11.1         |   |  |
| chr5.0156893973  | 0.74  | 4.47E-02 | ADAM19, NIPAL4        |   |  |
| chr14.0081388455 | -0.83 | 4.48E-02 | CEP128                |   |  |
| chr11.0002291427 | -0.85 | 4.48E-02 | ASCL2                 |   |  |
| chr3.0138329586  | -0.80 | 4.50E-02 | FAIM                  |   |  |
| chr16.0018418518 | -1.09 | 4.50E-02 | NPIPA8                |   |  |
| chr16.0059132785 | 0.70  | 4.51E-02 |                       |   |  |
| chr18.0036282984 | 0.95  | 4.52E-02 |                       |   |  |

|                  |       |          |               |  |   |
|------------------|-------|----------|---------------|--|---|
| chr22.0049851087 | -0.99 | 4.52E-02 | C22orf34      |  |   |
| chr20.0010823170 | 0.97  | 4.52E-02 | RP11-103J8.1  |  |   |
| chr9.0138649349  | 1.05  | 4.52E-02 | KCNT1         |  |   |
| chr12.0027218245 | 0.92  | 4.53E-02 | MED21         |  |   |
| chr13.0099687193 | 1.06  | 4.53E-02 | DOCK9         |  |   |
| chr10.0006094904 | 0.80  | 4.54E-02 | IL2RA         |  |   |
| chr18.0048045670 | 0.70  | 4.54E-02 |               |  | X |
| chr20.0061696282 | -1.34 | 4.54E-02 | RP11-305P22.9 |  |   |
| chr18.0056143957 | -1.22 | 4.54E-02 |               |  | X |
| chr20.0000545112 | 1.09  | 4.54E-02 |               |  |   |
| chr14.0035805016 | -0.76 | 4.54E-02 |               |  |   |
| chr6.0031116343  | 0.83  | 4.55E-02 | CCHCR1        |  |   |
| chr12.0103285072 | -0.86 | 4.55E-02 | PAH           |  |   |
| chr20.0004983137 | -1.36 | 4.55E-02 | SLC23A2       |  |   |
| chr15.0048366878 | 0.95  | 4.55E-02 |               |  |   |
| chr5.0013843916  | 0.78  | 4.57E-02 |               |  |   |
| chr5.0071546775  | -0.91 | 4.58E-02 | MRPS27        |  |   |
| chr5.0179126759  | 1.32  | 4.58E-02 |               |  |   |
| chr20.0042363457 | 0.85  | 4.58E-02 |               |  |   |
| chr14.0099855064 | -0.96 | 4.58E-02 |               |  |   |
| chr2.0005435898  | -0.86 | 4.59E-02 |               |  |   |
| chr12.0130962090 | 0.89  | 4.59E-02 |               |  |   |
| chr12.0114887843 | 0.62  | 4.59E-02 |               |  |   |
| chr9.0046799376  | 0.84  | 4.60E-02 |               |  |   |
| chr13.0080202808 | 1.16  | 4.60E-02 |               |  |   |
| chr13.0057713776 | 2.36  | 4.61E-02 |               |  |   |
| chr4.0108519668  | 0.62  | 4.61E-02 | PAPSS1        |  |   |
| chr12.0122523166 | 0.76  | 4.61E-02 | MLXIP         |  |   |
| chr12.0097528239 | -0.86 | 4.61E-02 | RP11-541G9.1  |  |   |
| chr3.0123392817  | -0.84 | 4.61E-02 |               |  |   |
| chr6.0150612047  | 1.01  | 4.61E-02 |               |  |   |
| chr20.0042767780 | -0.44 | 4.62E-02 | JPH2          |  |   |
| chr9.0133537741  | 1.22  | 4.62E-02 |               |  |   |
| chr2.0023812332  | 0.88  | 4.62E-02 | KLHL29        |  |   |
| chr19.0046917438 | 1.00  | 4.64E-02 |               |  |   |
| chr5.0095194629  | -1.11 | 4.64E-02 | C5orf27       |  |   |
| chr20.0040369703 | 0.82  | 4.64E-02 |               |  |   |
| chr9.0004277896  | 1.20  | 4.64E-02 | GLIS3         |  |   |
| chr22.0037898653 | -0.79 | 4.65E-02 | CARD10        |  |   |
| chr11.0070461935 | 0.72  | 4.65E-02 | SHANK2        |  |   |
| chr9.0069655629  | -0.94 | 4.65E-02 | AL445665.1    |  |   |

|                  |       |          |                |   |   |
|------------------|-------|----------|----------------|---|---|
| chr14.0104817261 | -1.49 | 4.68E-02 |                |   |   |
| chr16.0032029419 | 1.03  | 4.68E-02 | RP11-1166P10.6 |   |   |
| chr14.0095134050 | 0.96  | 4.68E-02 |                |   |   |
| chr3.0079397217  | 0.73  | 4.68E-02 | ROBO1          |   |   |
| chr2.0151525923  | 0.66  | 4.68E-02 |                |   |   |
| chr9.0006651347  | 0.67  | 4.68E-02 | RP11-390F4.6   |   |   |
| chr16.0081889624 | 0.88  | 4.68E-02 | PLCG2          |   |   |
| chr11.0096219833 | 0.77  | 4.68E-02 | JRKL, JRKL-AS1 |   |   |
| chr13.0026498399 | 0.82  | 4.68E-02 |                |   | X |
| chr3.0189791239  | -1.13 | 4.68E-02 | LEPREL1        |   |   |
| chr6.0040954533  | 0.86  | 4.68E-02 |                |   | X |
| chr16.0013107677 | 0.72  | 4.70E-02 | SHISA9         |   |   |
| chr17.0079996194 | 0.92  | 4.70E-02 | RP13-650J16.1  |   |   |
| chr6.0149094521  | -0.76 | 4.70E-02 | UST            |   |   |
| chr7.0111845429  | 0.87  | 4.70E-02 | DOCK4          |   |   |
| chr14.0091071955 | 0.84  | 4.70E-02 | TTC7B          |   |   |
| chr7.0124571125  | -0.88 | 4.70E-02 | POT1-AS1       |   |   |
| chr6.0165332638  | 0.72  | 4.71E-02 |                |   |   |
| chr2.0238320931  | 0.83  | 4.71E-02 | COL6A3         | X |   |
| chr13.0026245179 | -0.85 | 4.71E-02 |                |   |   |
| chr9.0126777284  | 0.68  | 4.71E-02 | LHX2           |   |   |
| chr13.0069678204 | 0.90  | 4.72E-02 |                |   |   |
| chr16.0068734681 | 0.83  | 4.72E-02 | CDH3           |   |   |
| chr9.0138111130  | 0.91  | 4.74E-02 | RP11-399H11.3  |   |   |
| chr18.0056037944 | -0.87 | 4.75E-02 |                |   |   |
| chr5.0046194285  | -0.86 | 4.76E-02 |                |   |   |
| chr17.0019019082 | -0.84 | 4.76E-02 |                |   |   |
| chr20.0023155959 | 0.85  | 4.76E-02 |                |   |   |
| chr20.0024664643 | 0.92  | 4.77E-02 |                |   |   |
| chr6.0135083056  | 0.69  | 4.78E-02 |                |   |   |
| chr6.0158051172  | 0.93  | 4.78E-02 | ZDHHC14        |   |   |
| chr15.0099177743 | -0.80 | 4.79E-02 |                |   | X |
| chr14.0026099101 | 1.26  | 4.80E-02 |                |   |   |
| chr9.0111559847  | 0.75  | 4.80E-02 |                |   |   |
| chr13.0100174570 | 0.80  | 4.80E-02 | TM9SF2         |   |   |
| chr13.0044948756 | 1.07  | 4.80E-02 | SERP2          |   |   |
| chr12.0127420168 | 0.89  | 4.80E-02 | RP11-575F12.1  |   |   |
| chr2.0223166989  | 0.90  | 4.80E-02 | CCDC140        |   |   |
| chr20.0047082687 | 0.89  | 4.80E-02 |                |   |   |
| chr20.0036134828 | -0.81 | 4.80E-02 | BLCAP          |   | X |
| chr18.0031894875 | 0.91  | 4.80E-02 |                |   |   |

|                  |       |          |                       |  |   |
|------------------|-------|----------|-----------------------|--|---|
| chr18.0008069950 | -1.00 | 4.80E-02 |                       |  |   |
| chr18.0073520541 | -0.52 | 4.80E-02 |                       |  |   |
| chr17.0070357736 | 0.78  | 4.80E-02 | LINC00511             |  |   |
| chr6.0114651208  | 0.72  | 4.81E-02 | RP3-399L15.3, HS3ST5  |  | X |
| chr16.0020444478 | 1.14  | 4.81E-02 | ACSM5                 |  |   |
| chr21.0043893935 | 0.67  | 4.81E-02 | RSPH1                 |  |   |
| chr11.0017593750 | -0.91 | 4.81E-02 | OTOG                  |  |   |
| chr18.0068910726 | 1.21  | 4.81E-02 |                       |  |   |
| chr2.0143885175  | 0.74  | 4.82E-02 | ARHGAP15              |  |   |
| chr12.0054441154 | 1.04  | 4.83E-02 |                       |  | X |
| chr18.0022272403 | 0.81  | 4.84E-02 |                       |  |   |
| chr18.0006837701 | 0.64  | 4.84E-02 | ARHGAP28              |  |   |
| chr12.0050507247 | -0.82 | 4.84E-02 | COX14, RP4-605O3.4    |  |   |
| chr3.0181431204  | -1.07 | 4.84E-02 | SOX2-OT, SOX2         |  |   |
| chr8.0117644009  | 0.81  | 4.85E-02 |                       |  |   |
| chr20.0052475838 | 0.83  | 4.85E-02 |                       |  |   |
| chr13.0027414220 | 1.41  | 4.85E-02 |                       |  |   |
| chr6.0167422116  | -0.99 | 4.85E-02 | FGFR1OP, RP11-517H2.6 |  |   |
| chr10.0071266674 | 0.68  | 4.85E-02 | TSPAN15               |  |   |
| chr16.0089927438 | -0.97 | 4.86E-02 | SPIRE2                |  |   |
| chr6.0169494777  | 0.87  | 4.86E-02 |                       |  |   |
| chr17.0041656132 | 1.03  | 4.86E-02 | RP11-392O1.4, ETV4    |  |   |
| chr18.0077339715 | 0.83  | 4.86E-02 | RP11-567M16.1         |  |   |
| chr14.0093191004 | -0.53 | 4.86E-02 | LGMN                  |  |   |
| chr2.0065538907  | 0.72  | 4.87E-02 | SPRED2                |  |   |
| chr2.0134057040  | 0.65  | 4.87E-02 | NCKAP5                |  |   |
| chr20.0045710639 | -0.84 | 4.87E-02 | EYA2                  |  |   |
| chr11.0011488647 | -0.68 | 4.87E-02 | GALNT18               |  |   |
| chr15.0029504631 | 0.93  | 4.87E-02 | FAM189A1              |  |   |
| chr15.0021059321 | -1.52 | 4.88E-02 | POTEB2                |  |   |
| chr5.0005255542  | 0.74  | 4.91E-02 | ADAMTS16              |  |   |
| chr5.0002831599  | 0.85  | 4.91E-02 | RP11-468D11.1         |  |   |
| chr5.0001005654  | -0.99 | 4.91E-02 | RP11-43F13.4          |  |   |
| chr6.0111172259  | -0.72 | 4.91E-02 |                       |  |   |
| chr14.0073127258 | -0.84 | 4.91E-02 | DPF3                  |  |   |
| chr19.0022857817 | 0.72  | 4.92E-02 | CTC-457E21.9          |  |   |
| chr18.0049179172 | -1.20 | 4.92E-02 |                       |  |   |
| chr6.0051719910  | -0.97 | 4.92E-02 | PKHD1                 |  | X |
| chr5.0003988100  | 0.94  | 4.92E-02 |                       |  |   |
| chr16.0003696466 | 0.97  | 4.92E-02 | DNASE1                |  |   |
| chr3.0039328066  | 0.71  | 4.92E-02 | RP11-331G2.6          |  |   |

|                  |       |          |                 |   |   |
|------------------|-------|----------|-----------------|---|---|
| chr12.0130083075 | 0.95  | 4.92E-02 |                 |   |   |
| chr16.0059568501 | 0.70  | 4.92E-02 |                 |   |   |
| chr18.0032397156 | 0.78  | 4.94E-02 | DTNA            | X | X |
| chr20.0005006235 | -0.88 | 4.94E-02 |                 |   |   |
| chr2.0150195221  | 0.75  | 4.95E-02 | LYPD6           |   |   |
| chr18.0049041058 | 0.81  | 4.95E-02 |                 |   |   |
| chr17.0001057768 | 0.93  | 4.95E-02 |                 |   |   |
| chr12.0062497446 | 0.75  | 4.96E-02 |                 |   |   |
| chr12.0002505095 | 0.82  | 4.96E-02 | CACNA1C         | X |   |
| chr18.0044221958 | -0.53 | 4.96E-02 | LOXHD1          |   |   |
| chr20.0017996650 | -0.71 | 4.97E-02 | OVOL2           |   |   |
| chr6.0115910955  | 0.83  | 4.97E-02 |                 |   |   |
| chr5.0174832325  | 0.85  | 4.97E-02 |                 |   |   |
| chr3.0189389138  | 0.67  | 4.97E-02 | TP63            |   |   |
| chr16.0071132400 | 0.78  | 4.97E-02 | HYDIN           |   |   |
| chr11.0072553556 | 0.84  | 4.98E-02 | ATG16L2, FCHSD2 |   |   |
| chr11.0120962446 | -0.78 | 4.99E-02 |                 |   |   |
